# Supplementary material for: Synthesis of spiropyridazine-benzosultams by the [4 + 2] annulation reaction of 3-substituted benzoisothiazole 1,1-dioxides with 1,2-diaza-1,3-dienes
Source: publisher site journal article supplement (doi:10.3762/bjoc.20.29), 2024-02-14

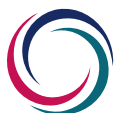

## Supporting Information

for

### **Synthesis of spiropyridazine-benzosultams by the [4 + 2] annulation reaction of 3-substituted benzoisothiazole 1,1-dioxides with 1,2-diaza-1,3-dienes**

Wenqing Hao, Long Wang, Jinlei Zhang, Dawei Teng and Guorui Cao

*Beilstein J. Org. Chem.* **2024**, *20*, 280–286. [doi:10.3762/bjoc.20.29](https://doi.org/10.3762/bjoc.20.29)

## **Experimental part, NMR and HRMS spectra**

## Table of Contents

|                                                                                                                             |         |
|-----------------------------------------------------------------------------------------------------------------------------|---------|
| 1. General information.....                                                                                                 | S2      |
| 2. General procedure for the synthesis of compound <b>3</b> and <b>4</b> .....                                              | S2–S3   |
| 3. Characterization data of compound <b>3</b> and <b>4</b> .....                                                            | S3–S11  |
| 4. Crystallographic information of <b>3aa</b> and <b>4aa</b> .....                                                          | S12–S23 |
| 5. The <sup>1</sup> H NMR, <sup>13</sup> C NMR <sup>19</sup> F NMR and HRMS spectra of compound <b>3</b> and <b>4</b> ..... | S24–S48 |
| 6. <sup>1</sup> H NMR chromatograms of compound <b>3</b> and its diastereoisomer.....                                       | S49–S55 |

## General information

All chemicals and reagents were purchased from commercial sources and used as received unless otherwise specified. Compounds **1a–c**, **2a–l** were synthesized according to the previous literature [1, 2]. All reactions were monitored by TLC. Melting points were recorded on a RY-1 microscopic melting apparatus and were uncorrected. Chromatography refers to open column chromatography on silica gel (100–200 mesh). <sup>1</sup>H NMR spectra were recorded on 500 MHz and <sup>13</sup>C NMR spectra were recorded on 125 MHz by using a Bruker Avance 500M spectrometer. Chemical shifts were reported in parts per million (δ) relative to tetramethylsilane (TMS). Mass spectra were performed on an Ultima Global spectrometer with an ESI source. The X-ray single-crystal diffraction was performed on Saturn 724+ instrument.

## General procedure for the synthesis of spirohydrazine-benzosultams

### (**3aa** was taken as the example)

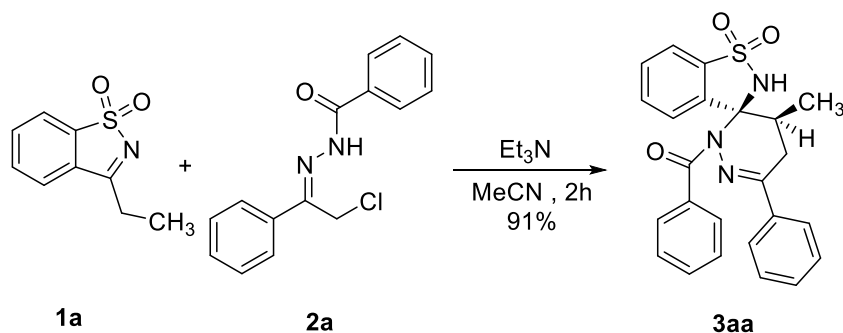

Triethylamine (0.15 g, 1.54 mmol, 2.00 equiv) was added dropwise into the 3-ethylbenzo[d]isothiazole 1,1-dioxide (**1a**, 0.15 g, 0.77 mmol, 1.00 equiv) dissolved in MeCN (7.7 mL). The resulting mixture was stirred for 5 min at room temperature and then α-chloro-β-phenylhydrazide (**2a**) (0.31 g, 1.15 mmol, 1.50 equiv) was added slowly into the reaction system. The reaction mixture was stirred at room temperature for 2 h and the progress of reaction was monitored continuously by TLC with ethyl acetate/petroleum ether (3:1) eluent system. Concentrated under reduced pressure and purified by column chromatography to obtain anticipated product **3aa** (0.30 g, 91%).

## General procedure for the synthesis of 1,2-benzothiazin-3,3-disubstituted-4-one **4aa**

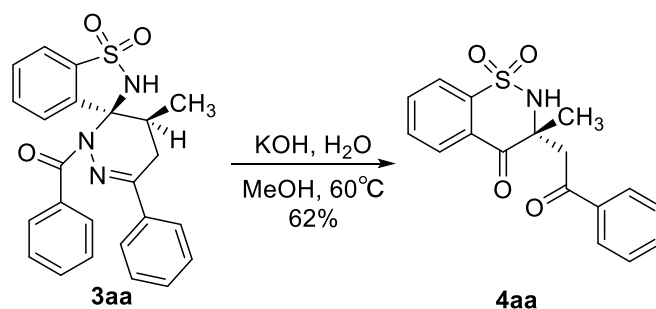

A mixture of compound **3aa** (150 mg, 0.35 mmol, 1.00 equiv), KOH (39 mg, 0.70 mmol, 2.50 equiv), H<sub>2</sub>O (12.6 mg, 0.70 mmol, 2.00 equiv) were dissolved in MeOH (11.0 mL). The reaction mixture was stirred at 60 °C for 12 h and the progress of reaction was monitored continuously by TLC. Concentrated under reduced pressure and purified by column chromatography with petroleum ether/ethyl acetate (8:1) to obtain 1,2-benzothiazin-3,3-disubstituted-4-one **4aa** (71.7 mg, 62%) as white solid.

## References

1. Liu, T.; Feng, X.; Du, H. *Tetrahedron. Lett.*, **2022**, 111, 154202. doi: 10.1016/j.tetlet.2022.154202
2. Chen, B.; Chu, W. D.; Liu, Q. Z. *RSC. Adv.*, **2019**, 9, 1487-1490. doi: 10.1039/C8RA08909D

## Characterization data of compound 3 and 4

1) ((3*R*\*,4'*S*'\*)-4'-Methyl-1,1-dioxido-6'-phenyl-4',5'-dihydro-2*H*,2'*H*-spiro[benzo[*d*]isothiazole-3,3'-pyridazin]-2'-yl)(phenyl)methanone (**3aa**).

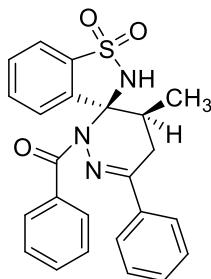

Yield: 91%. White solid; m.p.:179-180°C; <sup>1</sup>H NMR (500 MHz, CDCl<sub>3</sub>) δ 7.88 (d, *J* = 7.5 Hz, 1H), 7.79-7.77 (m, 2H), 7.65-7.56 (m, 4H), 7.51-7.48 (m, 1H), 7.42-7.34 (m, 6H), 5.06 (s, 1H), 2.94 (dd, *J* = 17.0, 4.0 Hz, 1H), 2.66-2.60 (m, 1H), 2.58-2.52 (m, 1H), 0.95 (d, *J* = 6.5 Hz, 3H); <sup>13</sup>C NMR (125 MHz, CDCl<sub>3</sub>) δ 170.7, 147.0, 140.2, 136.3, 136.0, 134.6, 134.1, 131.5, 130.4, 130.2, 130.0, 128.7, 127.7, 125.6, 121.8, 121.1, 77.0, 36.3, 27.9, 14.7; HRMS (ESI-TOF<sup>+</sup>): *m/z* calculated for C<sub>24</sub>H<sub>21</sub>N<sub>3</sub>O<sub>3</sub>S, [M+Na]<sup>+</sup>: 454.1201, found: 454.1201.

2) ((3*R*\*,4'*S*'\*)-4'-Methyl-1,1-dioxido-6'-(*p*-tolyl)-4',5'-dihydro-2*H*,2'*H*-spiro[benzo[*d*]isothiazole-3,3'-pyridazin]-2'-yl)(phenyl)methanone (**3ab**)

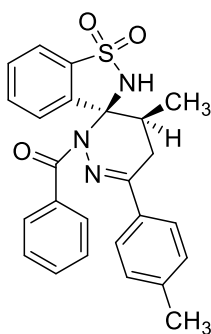

Yield: 85%. White solid; m.p.:136-138°C; <sup>1</sup>H NMR (500 MHz, DMSO) δ 8.80 (s, 1H), 7.83 (d, *J* = 8.0 Hz, 1H), 7.69-7.66 (m, 2H), 7.63-7.60 (m, 3H), 7.51-7.48 (m, 1H), 7.45-7.42 (m, 4H), 7.16 (d, *J* = 8.0 Hz, 2H), 2.98 (dd, *J* = 18.0, 4.5 Hz, 1H), 2.72-2.67 (m, 1H), 2.46-2.43 (m, 1H), 2.28 (s, 3H), 0.69 (d, *J* = 6.5 Hz, 3H); <sup>13</sup>C NMR (125 MHz, DMSO) δ 169.3, 146.0, 139.6, 138.9, 136.1, 136.0, 133.7, 133.4, 130.4, 129.6, 129.2, 129.0, 127.4, 125.2, 121.8, 120.6, 75.5, 34.9, 27.0, 20.8, 13.9; HRMS (ESI-TOF<sup>+</sup>): *m/z* calculated for C<sub>25</sub>H<sub>23</sub>N<sub>3</sub>O<sub>3</sub>S, [M+Na]<sup>+</sup>: 468.1358, found: 468.1358.

3) ((3*R*\*,4'*S*'\*)-6'-(4-Methoxyphenyl)-4'-methyl-1,1-dioxido-4',5'-dihydro-2*H*,2'*H*-spiro[benzo[*d*]isothiazole-3,3'-pyridazin]-2'-yl)(phenyl)methanone (**3ac**)

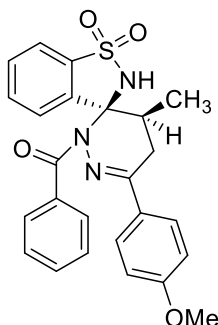

Yield: 83%. White solid; m.p.:136-138°C; <sup>1</sup>H NMR (500 MHz, DMSO) δ 8.78 (s, 1H), 7.83 (d, *J* = 7.5 Hz, 1H), 7.69-7.61 (m, 5H), 7.51-7.42 (m, 5H), 6.91 (d, *J* = 9.0 Hz, 2H), 3.75 (s, 3H), 2.97 (dd, *J* = 17.5, 4.5 Hz, 1H), 2.71-2.66 (m, 1H), 2.48-2.41 (m, 1H), 0.69 (d, *J* = 6.5 Hz, 3H); <sup>13</sup>C NMR (125 MHz, DMSO) δ 169.2, 160.2, 145.7, 139.7, 136.2, 136.0, 133.4, 130.4, 129.6, 129.2, 128.9, 127.4, 126.8, 121.7, 120.6, 113.8, 75.4, 55.2, 34.9, 27.0, 13.9; HRMS (ESI-TOF<sup>+</sup>): *m/z* calculated for C<sub>25</sub>H<sub>23</sub>N<sub>3</sub>O<sub>4</sub>S, [M+Na]<sup>+</sup>: 484.1307, found: 484.1301.

4) ((3*R*\*,4'*S*'\*)-6'-(4-Fluorophenyl)-4'-methyl-1,1-dioxido-4',5'-dihydro-2*H*,2'*H*-spiro[benzo[*d*]isothiazole-3,3'-pyridazin]-2'-yl)(phenyl)methanone (**3ad**)

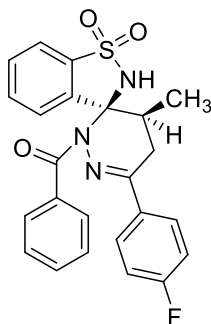

Yield: 93%. White solid; m.p.:200-202°C; <sup>1</sup>H NMR (500 MHz, DMSO) δ 8.79 (s, 1H), 7.84 (d, *J* = 7.6 Hz, 1H), 7.69-7.68 (m, 2H), 7.63-7.56 (m, 5H), 7.52-7.43 (m, 3H), 7.20 (t, *J* = 8.7 Hz, 2H), 3.00 (dd, *J* = 17.8, 4.2 Hz, 1H), 2.72-2.70 (m, 1H), 2.48-2.45 (m, 1H), 0.69 (d, *J* = 6.4 Hz, 3H); <sup>13</sup>C NMR (125 MHz, CDCl<sub>3</sub>) δ 169.3, 162.7 (d, <sup>1</sup>*J*<sub>C-F</sub>=246.3 Hz), 145.2, 139.4, 136.0, 133.4, 132.9, 130.6, 129.7, 129.2, 127.5, 121.8, 120.6, 115.5, 115.3, 75.4, 34.8, 27.1, 13.9; <sup>19</sup>F NMR (376 MHz, DMSO) δ -111.93; HRMS (ESI-TOF<sup>+</sup>): *m/z* calculated for C<sub>24</sub>H<sub>20</sub>FN<sub>3</sub>O<sub>3</sub>S, [M+Na]<sup>+</sup>: 472.1107, found: 472.1109.

5) ((3*R*\*,4'*S*'\*)-6'-(4-Chlorophenyl)-4'-methyl-1,1-dioxido-4',5'-dihydro-2*H*,2'*H*-spiro[benzo[*d*]isothiazole-3,3'-pyridazin]-2'-yl)(phenyl)methanone (**3ae**)

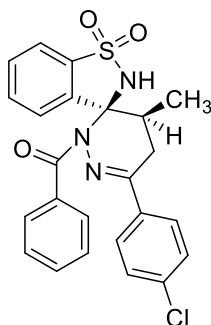

Yield: 91%. White solid; m.p.:144-146°C; <sup>1</sup>H NMR (500 MHz, CDCl<sub>3</sub>) δ 7.86 (d, *J* = 7.5 Hz, 1H), 7.75 (d, *J* = 7.5 Hz, 2H), 7.65-7.57 (m, 2H), 7.51-7.48 (m, 3H), 7.42 – 7.36 (m, 3H), 7.30 (d, *J* = 8.5 Hz, 2H), 5.16 (s, 1H), 2.89 (dd, *J* = 16.5, 3.0 Hz, 1H), 2.63-2.57 (m, 1H), 2.56-2.52 (m, 1H), 0.94 (d, *J* = 6.0 Hz, 3H); <sup>13</sup>C NMR (125 MHz, CDCl<sub>3</sub>) δ 170.6, 145.8, 140.0, 136.2, 135.8, 134.6, 134.1, 131.5, 130.4, 130.3, 128.9, 127.7, 126.9, 121.8, 121.1, 36.3, 27.8, 14.6; HRMS (ESI-TOF+): *m/z* calculated for C<sub>24</sub>H<sub>20</sub>ClN<sub>3</sub>O<sub>3</sub>S, [M+Na]<sup>+</sup>: 488.0812, found: 488.0808.

6) ((3*R*\*,4'*S*'\*)-6'-(4-Bromophenyl)-4'-methyl-1,1-dioxido-4',5'-dihydro-2*H*,2'*H*-spiro[benzo[*d*]isothiazole-3,3'-pyridazin]-2'-yl)(phenyl)methanone (**3af**)

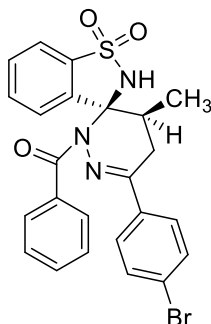

Yield: 90%. White solid; m.p.:152-154°C; <sup>1</sup>H NMR (500 MHz, CDCl<sub>3</sub>) δ 7.86 (d, *J* = 7.5 Hz, 1H), 7.75 (d, *J* = 7.5 Hz, 2H), 7.65-7.57 (m, 2H), 7.51-7.45 (m, 3H), 7.42-7.36 (m, 5H), 5.14 (s, 1H), 2.88 (dd, *J* = 17.0, 3.5 Hz, 1H), 2.63-2.57 (m, 1H), 2.56-2.51 (m, 1H), 0.94 (d, *J* = 6.5 Hz, 3H); <sup>13</sup>C NMR (125 MHz, CDCl<sub>3</sub>) δ 170.6, 145.9, 140.0, 136.3, 135.0, 134.6, 134.1, 131.9, 131.5, 130.3, 127.7, 127.1, 124.2, 121.8, 121.1, 36.3, 27.8, 14.6; HRMS (ESI-TOF+): *m/z* calculated for C<sub>24</sub>H<sub>20</sub>BrN<sub>3</sub>O<sub>3</sub>S, [M+Na]<sup>+</sup>: 532.0306, found: 532.0300.

7) ((3*R*\*,4'*S*'\*)-4'-Methyl-6'-(4-nitrophenyl)-1,1-dioxido-4',5'-dihydro-2*H*,2'*H*-spiro[benzo[*d*]isothiazole-3,3'-pyridazin]-2'-yl)(phenyl)methanone (**3ag**)

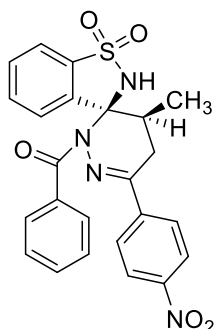

Yield: 94%. White solid; m.p.:210-212°C; <sup>1</sup>H NMR (500 MHz, DMSO) δ 8.86 (s, 1H), 8.22 (d, *J* = 9.0 Hz, 2H), 7.86 (d, *J* = 7.5 Hz, 1H), 7.76 (d, *J* = 9.0 Hz, 2H), 7.71-7.63 (m, 5H), 7.55-7.52 (m, 1H), 7.48-7.45 (m, 2H), 3.08 (dd, *J* = 18.0, 4.5 Hz, 1H), 2.80-2.75 (m, 1H), 2.57-2.54 (m, 1H), 0.71 (d, *J* = 6.5 Hz, 3H); <sup>13</sup>C NMR (125 MHz, DMSO) δ 169.3, 147.5, 144.4, 142.4, 139.1, 136.0, 135.5, 133.5, 130.9, 129.8, 129.3, 127.6, 126.3, 123.8, 121.8, 120.7, 75.5, 34.7, 27.1, 13.8; HRMS (ESI-TOF+): *m/z* calculated for C<sub>24</sub>H<sub>20</sub>N<sub>4</sub>O<sub>5</sub>S, [M+Na]<sup>+</sup>:499.1052, found: 499.1056.

8) ((3*R*\*,4'*S*'\*)-4'-Methyl-1,1-dioxido-6'-phenyl-4',5'-dihydro-2*H*,2'*H*-spiro[benzo[*d*]isothiazole-3,3'-pyridazin]-2'-yl)(*p*-tolyl)methanone (**3ah**)

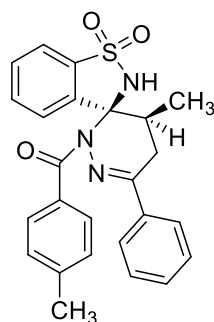

Yield: 86%. White solid; m.p.:194-196°C; <sup>1</sup>H NMR (500 MHz, DMSO) δ 8.78 (s, 1H), 7.83 (d, *J* = 7.0 Hz, 1H), 7.66 (s, 2H), 7.60-7.56 (m, 5H), 7.37 (s, 3H), 7.25 (d, *J* = 7.0 Hz, 2H), 2.99 (d, *J* = 17.5 Hz, 1H), 2.71-2.70 (m, 1H), 2.37 (s, 3H), 0.69 (d, *J* = 5.5 Hz, 3H); <sup>13</sup>C NMR (125 MHz, DMSO) δ 169.1, 145.8, 140.5, 139.6, 136.5, 136.0, 133.4, 133.0, 129.6, 129.3, 128.5, 128.0, 125.3, 121.7, 120.6, 75.5, 34.9, 27.2, 21.1, 13.9; HRMS (ESI-TOF+): *m/z* calculated for C<sub>25</sub>H<sub>23</sub>N<sub>3</sub>O<sub>3</sub>S, [M+Na]<sup>+</sup>:468.1358, found: 468.1355.



9) (4-Methoxyphenyl)((3*R*\*,4'*S*'\*)-4'-methyl-1,1-dioxido-6'-phenyl-4',5'-dihydro-2*H*,2'*H*-spiro[benzo[*d*]isothiazole-3,3'-pyridazin]-2'-yl)methanone (**3ai**)

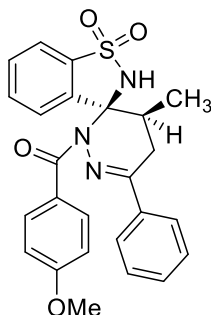

Yield: 85%. White solid; m.p.:192-194°C; <sup>1</sup>H NMR (500 MHz, DMSO) δ 8.75 (s, 1H), 7.82 (d, *J* = 7.5 Hz, 1H), 7.67-7.60 (m, 7H), 7.39-7.37 (m, 3H), 6.98 (d, *J* = 8.5 Hz, 2H), 3.82 (s, 3H), 2.99 (dd, *J* = 17.8, 4.3 Hz, 1H), 2.74-.69 (m, 1H), 0.69 (d, *J* = 6.4 Hz, 3H); <sup>13</sup>C NMR (125 MHz, DMSO) δ 168.6, 161.2, 145.5, 139.6, 136.5, 136.0, 133.4, 131.9, 129.5, 129.2, 128.5, 127.6, 125.3, 121.7, 120.6, 112.7, 75.5, 55.3, 34.9, 27.2, 14.0; HRMS (ESI-TOF+): *m/z* calculated for C<sub>25</sub>H<sub>23</sub>N<sub>3</sub>O<sub>4</sub>S, [M+Na]<sup>+</sup>:484.1307, found: 484.1306.

10) (4-Fluorophenyl)((3*R*\*,4'*S*'\*)-4'-methyl-1,1-dioxido-6'-phenyl-4',5'-dihydro-2*H*,2'*H*-spiro[benzo[*d*]isothiazole-3,3'-pyridazin]-2'-yl)methanone (**3aj**)

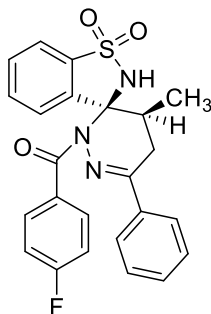

Yield: 92%. White solid; m.p.:176-178°C; <sup>1</sup>H NMR (500 MHz, DMSO) δ 8.79 (s, 1H), 7.84 (d, *J* = 7.7 Hz, 1H), 7.74-7.67 (m, 4H), 7.63-7.60 (m, 1H), 7.57-7.55 (m, 2H), 7.38-7.37 (m, 3H), 7.29 (t, *J* = 8.8 Hz, 2H), 3.01 (dd, *J* = 17.8, 4.5 Hz, 1H), 2.74-2.70 (m, 1H), 0.69 (d, *J* = 6.5 Hz, 3H); <sup>13</sup>C NMR (125 MHz, DMSO) δ 168.2, 163.2 (d, <sup>1</sup>*J*<sub>C-F</sub>=293.3 Hz), 146.3, 139.4, 136.3, 136.0, 133.4, 132.3, 132.1, 132.0, 129.7, 129.4, 128.5, 125.3, 121.8, 120.6, 114.5, 114.4, 75.5, 34.8, 27.1, 13.9; <sup>19</sup>F NMR (376 MHz, DMSO) δ -109.44; HRMS (ESI-TOF+): *m/z* calculated for C<sub>24</sub>H<sub>20</sub>FN<sub>3</sub>O<sub>3</sub>S, [M+Na]<sup>+</sup>: 472.1107, found: 472.1104.

11) (4-Chlorophenyl)((3*R*\*,4'*S*'\*)-4'-methyl-1,1-dioxido-6'-phenyl-4',5'-dihydro-2*H*,2'*H*-spiro[benzo[*d*]isothiazole-3,3'-pyridazin]-2'-yl)methanone (**3ak**)

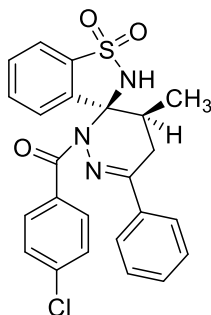

Yield: 88%. White solid; m.p.:188-190°C; <sup>1</sup>H NMR (500 MHz, DMSO) δ 8.80 (s, 1H), 7.84 (d, *J* = 7.5 Hz, 1H), 7.70-7.62 (m, 5H), 7.55-7.52 (m, 4H), 7.38 (s, 3H), 3.01 (d, *J* = 17.5 Hz, 1H), 2.71-2.70 (m, 1H), 0.69 (d, *J* = 6.0 Hz, 3H); <sup>13</sup>C NMR (125 MHz, DMSO) δ 168.2, 146.6, 139.4, 136.2, 135.9, 135.2, 134.8, 133.5, 131.2, 129.7, 129.4, 128.5, 127.6, 125.3, 121.8, 120.6, 75.5, 34.8, 27.1, 13.9; HRMS (ESI-TOF+): *m/z* calculated for C<sub>24</sub>H<sub>20</sub>ClN<sub>3</sub>O<sub>3</sub>S, [M+Na]<sup>+</sup>: 488.0812, found: 488.0805.

12) (4-Bromophenyl)((3*R*\*,4'*S*'\*)-4'-methyl-1,1-dioxido-6'-phenyl-4',5'-dihydro-2*H*,2'*H*-spiro[benzo[*d*]isothiazole-3,3'-pyridazin]-2'-yl)methanone (**3al**)

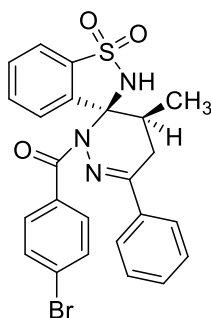

Yield: 88%. White solid; m.p.:184-186°C; <sup>1</sup>H NMR (500 MHz, DMSO) δ 8.80 (s, 1H), 7.84 (d, *J* = 7.7 Hz, 1H), 7.70-7.66 (m, 4H), 7.63-7.55 (m, 5H), 7.39-7.38 (m, 3H), 3.01 (dd, *J* = 17.8, 4.2 Hz, 1H), 2.73-2.69 (m, 1H), 0.69 (d, *J* = 6.4 Hz, 3H); <sup>13</sup>C NMR (125 MHz, DMSO) δ 168.3, 146.6, 139.4, 136.2, 135.9, 135.2, 133.5, 131.4, 130.5, 129.7, 129.4, 128.5, 125.3, 124.1, 121.8, 120.6, 75.5, 34.8, 27.1, 13.9; HRMS (ESI-TOF+): *m/z* calculated for C<sub>24</sub>H<sub>20</sub>BrN<sub>3</sub>O<sub>3</sub>S, [M+Na]<sup>+</sup>: 532.0306, found: 532.0313.

13) ((3*R*\*,4'*S*'\*)-6'-(3-Chloro-4-methoxyphenyl)-4'-methyl-1,1-dioxido-4',5'-dihydro-2*H*,2'*H*-spiro[benzo[*d*]isothiazole-3,3'-pyridazin]-2'-yl)(phenyl)methanone (**3am**)

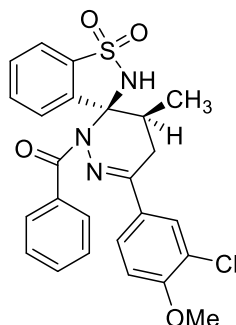

Yield: 86%. White solid; m.p.:190-192°C; <sup>1</sup>H NMR (500 MHz, CDCl<sub>3</sub>) δ 7.87 (d, *J* = 7.5 Hz, 1H), 7.76 (d, *J* = 7.6 Hz, 2H), 7.64-7.57 (m, 3H), 7.51-7.48 (m, 1H), 7.43-7.36 (m, 4H), 6.87 (d, *J* = 8.7 Hz, 1H), 3.90 (s, 3H), 2.86 (d, *J* = 13.5 Hz, 1H), 2.60-2.51 (m, 2H), 0.94 (d, *J* = 6.0 Hz, 3H); <sup>13</sup>C NMR (125 MHz, DMSO) δ 169.2, 144.6, 139.5, 136.1, 135.9, 133.4, 130.5, 129.8, 129.7, 129.2, 127.4, 126.7, 125.5, 121.8, 121.2, 120.7, 112.6, 75.4, 56.3, 34.9, 26.8, 13.9; HRMS (ESI-TOF+): *m/z* calculated for C<sub>25</sub>H<sub>22</sub>ClN<sub>3</sub>O<sub>4</sub>S, [M+Na]<sup>+</sup>:518.0917, found: 518.0914.

14) (*R*'\*)-(4',4'-Dimethyl-1,1-dioxido-6'-phenyl-4',5'-dihydro-2*H*,2'*H*-spiro[benzo[*d*]isothiazole-3,3'-pyridazin]-2'-yl)(phenyl)methanone (**3ba**)

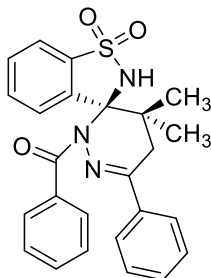

Yield: 40%. White solid; m.p.:242-244°C; <sup>1</sup>H NMR (500 MHz, DMSO) δ 8.85 (s, 1H), 7.87-7.86 (m, 1H), 7.64-7.63 (m, 5H), 7.53-7.45 (m, 5H), 7.36-7.35(m, 3H), 2.82 (s, 2H), 1.24 (s, 3H), 0.86 (s, 3H); <sup>13</sup>C NMR (125 MHz, DMSO) δ 170.0, 145.7, 137.3, 136.7, 136.3, 135.9, 132.2, 130.8, 129.7, 129.4, 129.3, 128.4, 127.6, 125.4, 124.2, 120.9, 78.2, 36.9, 34.9, 23.8, 23.0; HRMS (ESI-TOF+): *m/z* calculated for C<sub>25</sub>H<sub>23</sub>N<sub>3</sub>O<sub>3</sub>S, [M+Na]<sup>+</sup>:468.1358, found: 468.1351.

15) ((3*R*\*,4*S*\*)-1,1-Dioxido-6'-phenyl-4'-propyl-4',5'-dihydro-2*H*,2'*H*-spiro[benzo[*d*]isothiazole-3,3'-pyridazin]-2'-yl)(phenyl)methanone (**3ca**)

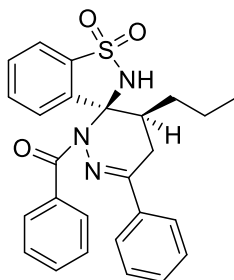

Yield: 92%. White solid; m.p.:174-176°C; <sup>1</sup>H NMR (500 MHz, DMSO) δ 8.82 (s, 1H), 7.84 (d, *J* = 7.4 Hz, 1H), 7.72-7.57 (m, 7H), 7.50-7.43 (m, 3H), 7.35 (s, 3H), 3.07 (d, *J* = 14.3 Hz, 1H), 2.61 (s, 1H), 2.46-2.43 (m, 1H), 1.36-1.28 (m, 2H), 1.04-1.03 (m, 1H), 0.69-0.67 (m, 4H); <sup>13</sup>C NMR (125 MHz, DMSO) δ 169.4, 145.7, 139.5, 136.5, 136.3, 136.1, 133.4, 130.5, 129.7, 129.2, 128.4, 127.4, 125.3, 121.9, 120.6, 75.4, 30.1, 24.8, 18.8, 13.9; HRMS (ESI-TOF+): *m/z* calculated for C<sub>26</sub>H<sub>25</sub>N<sub>3</sub>O<sub>3</sub>S, [M+Na]<sup>+</sup>:482.1514, found: 482.1511.

16) (*R*\*)-3-Methyl-3-(2-oxo-2-phenylethyl)-2,3-dihydro-4*H*-benzo[*e*][1,2]thiazin-4-one 1,1-dioxide (**4aa**)

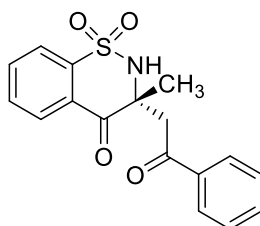

Yield: 62%. White solid; m.p.:156-158°C; <sup>1</sup>H NMR (500 MHz, DMSO) δ 8.69 (s, 1H), 8.05 (d, *J* = 7.9 Hz, 1H), 7.93-7.86 (m, 5H), 7.64 (t, *J* = 7.3 Hz, 1H), 7.50 (t, *J* = 7.6 Hz, 2H), 3.87 (dd, *J* = 85.0, 18.5 Hz, 2H), 1.70 (s, 3H); <sup>13</sup>C NMR (125 MHz, DMSO) δ 196.0, 195.1, 141.5, 135.6, 134.2, 133.6, 132.8, 129.7, 128.6, 128.2, 128.2, 122.1, 63.9, 51.4, 26.1; HRMS (ESI-TOF+): *m/z* calculated for C<sub>17</sub>H<sub>15</sub>NO<sub>4</sub>S, [M+Na]<sup>+</sup>:352.0619, found: 352.0611.

## Crystallographic information of 3aa and 4aa

Table S1. The crystal data and structure refinement for **3aa**

| Identification code                | 3aa                                                             |
|------------------------------------|-----------------------------------------------------------------|
| Empirical formula                  | C <sub>24</sub> H <sub>21</sub> N <sub>3</sub> O <sub>3</sub> S |
| Formula weight                     | 431.50                                                          |
| Temperature/K                      | 170.00(10)                                                      |
| Crystal system                     | triclinic                                                       |
| Space group                        | P-1                                                             |
| a/Å                                | 7.6579(2)                                                       |
| b/Å                                | 8.0465(2)                                                       |
| c/Å                                | 17.9509(4)                                                      |
| α/°                                | 77.190(2)                                                       |
| β/°                                | 80.016(2)                                                       |
| γ/°                                | 88.400(2)                                                       |
| Volume/Å <sup>3</sup>              | 1062.19(5)                                                      |
| Z                                  | 2                                                               |
| ρ <sub>calc</sub> /cm <sup>3</sup> | 1.349                                                           |
| μ/mm <sup>-1</sup>                 | 0.184                                                           |
| F(000)                             | 452.0                                                           |
| Crystal size/mm <sup>3</sup>       | 0.25 × 0.23 × 0.2                                               |
| Radiation                          | MoKα (λ = 0.71073)                                              |
| 2θ range for data collection/°     | 4.724 to 61.346                                                 |
| Index ranges                       | -8 ≤ h ≤ 10, -9 ≤ k ≤ 11, -23 ≤ l ≤ 23                          |
| Reflections collected              | 15701                                                           |
| Independent reflections            | 5582 [R <sub>int</sub> = 0.0231, R <sub>sigma</sub> = 0.0284]   |
| Data/restraints/parameters         | 5582/0/285                                                      |
| Goodness-of-fit on F <sup>2</sup>  | 1.070                                                           |
| Final R indexes [I >= 2σ (I)]      | R <sub>1</sub> = 0.0384, wR <sub>2</sub> = 0.0976               |
| Final R indexes [all data]         | R <sub>1</sub> = 0.0479, wR <sub>2</sub> = 0.1027               |

Table S2. Fractional atomic coordinates ( $\times 10^4$ ) and equivalent isotropic displacement parameters ( $\text{\AA}^2 \times 10^3$ ) for **3aa**.  $U_{\text{eq}}$  is defined as 1/3 of the trace of the orthogonalised  $U_{\text{ij}}$  tensor.

| Atom | X          | y          | z          | U(eq)    |
|------|------------|------------|------------|----------|
| S8   | 3035.4(4)  | 6742.5(4)  | 5508.6(2)  | 29.99(9) |
| O22  | 2353.3(12) | 7201.5(11) | 7386.6(6)  | 31.2(2)  |
| O24  | 3243.7(14) | 6262.6(14) | 4770.4(6)  | 43.1(3)  |
| O25  | 3742.7(14) | 8369.5(13) | 5493.5(7)  | 47.4(3)  |
| N10  | 2836.3(14) | 4352.9(12) | 7535.0(6)  | 25.5(2)  |
| N11  | 4098.9(14) | 3256.5(13) | 7848.6(6)  | 26.8(2)  |
| N9   | 3780.2(14) | 5224.9(13) | 6145.0(6)  | 26.2(2)  |
| C21  | 2684.1(15) | 5861.1(15) | 7802.3(7)  | 25.3(2)  |
| C26  | 2843.3(16) | 5740.3(16) | 8627.1(7)  | 27.2(3)  |
| C2   | 699.9(16)  | 5245.5(16) | 6650.3(8)  | 27.6(3)  |
| C12  | 4674.0(17) | 2004.6(15) | 7539.4(7)  | 28.4(3)  |
| C1   | 2411.5(16) | 4315.3(15) | 6769.3(7)  | 25.1(2)  |
| C7   | 842.1(16)  | 6509.4(16) | 5988.6(8)  | 27.7(3)  |
| C15  | 6159.3(17) | 1056.8(15) | 7864.3(8)  | 30.8(3)  |
| C14  | 2254.3(18) | 2413.6(16) | 6755.7(8)  | 31.0(3)  |
| C6   | -590.1(18) | 7478.2(18) | 5766.3(9)  | 35.3(3)  |
| C27  | 2183(2)    | 4364.5(19) | 9216.4(9)  | 37.8(3)  |
| C13  | 3994.2(19) | 1528.2(16) | 6882.7(8)  | 32.9(3)  |
| C31  | 3538.8(18) | 7141.1(18) | 8814.7(8)  | 34.2(3)  |
| C16  | 7283.3(19) | 92.4(18)   | 7429.8(9)  | 38.0(3)  |
| C3   | -947.4(17) | 4892.0(19) | 7123.3(9)  | 36.3(3)  |
| C20  | 6517(2)    | 1175.7(19) | 8582.0(9)  | 39.6(3)  |
| C17  | 8747(2)    | -700.0(19) | 7703.0(10) | 44.0(4)  |

|     |             |            |            |         |
|-----|-------------|------------|------------|---------|
| C5  | -2226.9(19) | 7104(2)    | 6234.4(10) | 43.2(4) |
| C23 | 1683(2)     | 2141.3(19) | 6022.1(9)  | 39.9(3) |
| C19 | 7979(2)     | 378(2)     | 8853.2(10) | 48.0(4) |
| C18 | 9106(2)     | -556.3(19) | 8407.0(10) | 46.0(4) |
| C4  | -2391.4(18) | 5838(2)    | 6903.2(11) | 44.8(4) |
| C30 | 3584(2)     | 7153(2)    | 9579.4(9)  | 45.4(4) |
| C28 | 2204(2)     | 4410(2)    | 9980.4(9)  | 48.3(4) |
| C29 | 2906(2)     | 5795(2)    | 10158.9(9) | 49.3(4) |

Table S3. Anisotropic Displacement Parameters ( $\text{\AA}^2 \times 10^3$ ) for **3aa**. The Anisotropic displacement factor exponent takes the form:  $-2 \pi^2 [h^2 a^* 2U_{11} + 2hka^* b^* U_{12} + \dots]$

| Atom | U11       | U22       | U33       | U23       | U13       | U12      |
|------|-----------|-----------|-----------|-----------|-----------|----------|
| S8   | 26.20(17) | 27.31(17) | 32.99(18) | -3.06(12) | -0.99(12) | 5.20(12) |
| O22  | 35.1(5)   | 23.9(4)   | 37.7(5)   | -10.0(4)  | -11.4(4)  | 6.8(4)   |
| O24  | 43.4(6)   | 53.1(6)   | 28.4(5)   | -5.3(5)   | -1.5(4)   | 18.6(5)  |
| O25  | 37.8(6)   | 26.4(5)   | 69.9(8)   | 1.3(5)    | -1.8(5)   | -2.2(4)  |
| N10  | 28.3(5)   | 21.3(5)   | 28.0(5)   | -7.8(4)   | -5.0(4)   | 3.9(4)   |
| N11  | 27.5(5)   | 21.5(5)   | 30.1(6)   | -5.0(4)   | -3.2(4)   | 3.4(4)   |
| N9   | 21.7(5)   | 25.3(5)   | 30.1(6)   | -6.1(4)   | -0.8(4)   | 4.1(4)   |
| C21  | 20.7(6)   | 23.9(6)   | 32.4(7)   | -10.2(5)  | -2.4(5)   | 2.4(4)   |
| C26  | 23.0(6)   | 28.3(6)   | 30.5(6)   | -10.1(5)  | -1.7(5)   | 5.2(5)   |
| C2   | 22.4(6)   | 29.4(6)   | 34.5(7)   | -14.5(5)  | -4.4(5)   | -0.8(5)  |
| C12  | 32.9(7)   | 20.1(6)   | 29.6(6)   | -4.7(5)   | 0.4(5)    | 1.3(5)   |
| C1   | 24.8(6)   | 23.4(6)   | 27.1(6)   | -7.7(5)   | -1.9(4)   | -1.2(4)  |
| C7   | 23.4(6)   | 29.9(6)   | 33.6(7)   | -14.0(5)  | -6.1(5)   | 3.2(5)   |
| C15  | 33.3(7)   | 18.7(6)   | 37.4(7)   | -4.2(5)   | -0.7(5)   | 2.3(5)   |
| C14  | 36.8(7)   | 23.5(6)   | 33.3(7)   | -8.9(5)   | -3.7(5)   | -3.4(5)  |
| C6   | 33.2(7)   | 37.9(7)   | 43.1(8)   | -20.0(6)  | -16.5(6)  | 10.1(6)  |
| C27  | 39.1(8)   | 34.7(7)   | 37.0(8)   | -9.7(6)   | 3.2(6)    | -1.1(6)  |
| C13  | 45.9(8)   | 20.3(6)   | 33.5(7)   | -9.4(5)   | -5.7(6)   | 4.2(5)   |

|     |          |          |          |          |          |         |
|-----|----------|----------|----------|----------|----------|---------|
| C31 | 37.2(7)  | 32.0(7)  | 35.1(7)  | -10.6(6) | -6.9(6)  | 0.6(5)  |
| C16 | 38.9(8)  | 28.9(7)  | 46.1(9)  | -12.7(6) | -1.8(6)  | 6.4(6)  |
| C3  | 25.8(7)  | 39.4(8)  | 44.6(8)  | -16.1(6) | 1.6(5)   | -7.3(5) |
| C20 | 44.8(8)  | 34.0(7)  | 39.2(8)  | -8.2(6)  | -6.7(6)  | 12.2(6) |
| C17 | 38.1(8)  | 31.4(7)  | 59.1(10) | -10.8(7) | 0.6(7)   | 9.0(6)  |
| C5  | 25.7(7)  | 51.0(9)  | 65.5(11) | -32.8(8) | -18.1(7) | 9.5(6)  |
| C23 | 48.2(9)  | 34.7(7)  | 42.5(8)  | -17.4(6) | -11.1(6) | -2.5(6) |
| C19 | 52.2(10) | 45.6(9)  | 46.0(9)  | -6.1(7)  | -15.6(7) | 14.4(7) |
| C18 | 37.7(8)  | 33.7(8)  | 61.0(11) | -0.2(7)  | -8.1(7)  | 10.3(6) |
| C4  | 19.5(6)  | 54.7(10) | 66.7(11) | -31.7(8) | -0.7(6)  | -4.5(6) |
| C30 | 52.6(9)  | 48.6(9)  | 42.1(9)  | -20.7(7) | -13.3(7) | 0.3(7)  |
| C28 | 56.5(10) | 48.6(9)  | 32.8(8)  | -3.0(7)  | 4.2(7)   | 1.1(7)  |
| C29 | 58.8(10) | 60.5(11) | 31.2(8)  | -16.4(7) | -7.6(7)  | 6.6(8)  |

Table S4. Bond lengths for **3aa**.

| Atom | Atom | Length/Å   | Atom | Atom | Length/Å   |
|------|------|------------|------|------|------------|
| S8   | O24  | 1.4424(11) | C1   | C14  | 1.5441(17) |
| S8   | O25  | 1.4237(11) | C7   | C6   | 1.3914(18) |
| S8   | N9   | 1.6401(11) | C15  | C16  | 1.3963(18) |
| S8   | C7   | 1.7444(13) | C15  | C20  | 1.386(2)   |
| O22  | C21  | 1.2156(15) | C14  | C13  | 1.5215(19) |
| N10  | N11  | 1.3968(14) | C14  | C23  | 1.5188(19) |
| N10  | C21  | 1.3954(15) | C6   | C5   | 1.382(2)   |
| N10  | C1   | 1.4733(16) | C27  | C28  | 1.383(2)   |
| N11  | C12  | 1.2866(16) | C31  | C30  | 1.381(2)   |
| N9   | C1   | 1.4703(16) | C16  | C17  | 1.384(2)   |
| C21  | C26  | 1.4881(17) | C3   | C4   | 1.389(2)   |
| C26  | C27  | 1.3881(19) | C20  | C19  | 1.383(2)   |
| C26  | C31  | 1.3899(18) | C17  | C18  | 1.369(2)   |
| C2   | C1   | 1.5150(17) | C5   | C4   | 1.381(3)   |



|     |     |            |     |     |          |
|-----|-----|------------|-----|-----|----------|
| C2  | C7  | 1.3721(19) | C19 | C18 | 1.394(2) |
| C2  | C3  | 1.3909(18) | C30 | C29 | 1.373(2) |
| C12 | C15 | 1.4832(18) | C28 | C29 | 1.373(2) |
| C12 | C13 | 1.4938(19) |     |     |          |

Table S5. Bond angles for **3aa**.

| Atom | Atom | Atom | Angle/°    | Atom | Atom | Atom | Angle/°    |
|------|------|------|------------|------|------|------|------------|
| O24  | S8   | N9   | 109.80(6)  | N9   | C1   | C14  | 112.56(10) |
| O24  | S8   | C7   | 111.67(6)  | C2   | C1   | C14  | 111.32(10) |
| O25  | S8   | O24  | 115.71(7)  | C2   | C7   | S8   | 110.54(9)  |
| O25  | S8   | N9   | 112.00(6)  | C2   | C7   | C6   | 123.06(13) |
| O25  | S8   | C7   | 111.31(6)  | C6   | C7   | S8   | 126.37(11) |
| N9   | S8   | C7   | 94.38(6)   | C16  | C15  | C12  | 120.07(13) |
| N11  | N10  | C1   | 120.73(9)  | C20  | C15  | C12  | 121.13(12) |
| C21  | N10  | N11  | 112.67(9)  | C20  | C15  | C16  | 118.72(13) |
| C21  | N10  | C1   | 120.44(10) | C13  | C14  | C1   | 109.54(10) |
| C12  | N11  | N10  | 119.94(11) | C23  | C14  | C1   | 113.01(11) |
| C1   | N9   | S8   | 114.88(8)  | C23  | C14  | C13  | 111.60(11) |
| O22  | C21  | N10  | 121.11(11) | C5   | C6   | C7   | 117.42(14) |
| O22  | C21  | C26  | 121.56(11) | C28  | C27  | C26  | 119.86(14) |
| N10  | C21  | C26  | 117.25(10) | C12  | C13  | C14  | 111.12(11) |
| C27  | C26  | C21  | 122.70(12) | C30  | C31  | C26  | 120.19(14) |
| C27  | C26  | C31  | 119.28(13) | C17  | C16  | C15  | 120.64(15) |
| C31  | C26  | C21  | 117.75(12) | C4   | C3   | C2   | 118.33(15) |
| C7   | C2   | C1   | 114.37(11) | C19  | C20  | C15  | 120.40(14) |
| C7   | C2   | C3   | 119.15(12) | C18  | C17  | C16  | 120.32(14) |
| C3   | C2   | C1   | 126.43(13) | C4   | C5   | C6   | 120.20(13) |
| N11  | C12  | C15  | 114.87(12) | C20  | C19  | C18  | 120.22(16) |
| N11  | C12  | C13  | 124.61(12) | C17  | C18  | C19  | 119.69(14) |

|     |     |     |            |     |     |     |            |
|-----|-----|-----|------------|-----|-----|-----|------------|
| C15 | C12 | C13 | 120.48(11) | C5  | C4  | C3  | 121.82(14) |
| N10 | C1  | C2  | 110.71(10) | C29 | C30 | C31 | 120.08(15) |
| N10 | C1  | C14 | 106.06(10) | C29 | C28 | C27 | 120.38(15) |
| N9  | C1  | N10 | 110.76(10) | C30 | C29 | C28 | 120.20(15) |
| N9  | C1  | C2  | 105.53(10) |     |     |     |            |

Table S6. Hydrogen bonds for **3aa**.

| D  | H  | A                | d(D-H)/Å  | d(H-A)/Å  | d(D-A)/Å   | D-H-A/°   |
|----|----|------------------|-----------|-----------|------------|-----------|
| N9 | H9 | O24 <sup>1</sup> | 0.824(18) | 2.146(18) | 2.9577(15) | 168.5(17) |

<sup>1</sup>1-X,1-Y,1-Z

Table S7. Hydrogen Atom Coordinates (Å × 10<sup>4</sup>) and Isotropic Displacement Parameters (Å<sup>2</sup> × 10<sup>3</sup>) for **3aa**.

| Atom | x        | y        | z       | U(eq) |
|------|----------|----------|---------|-------|
| H14  | 1342.12  | 1896.76  | 7193.99 | 37    |
| H6   | -451.79  | 8343.57  | 5320.2  | 42    |
| H27  | 1726.85  | 3414.21  | 9097.62 | 45    |
| H13A | 3815.53  | 303.34   | 6993.32 | 39    |
| H13B | 4866.8   | 1845.15  | 6413.18 | 39    |
| H31  | 3975.34  | 8072.92  | 8424.24 | 41    |
| H16  | 7046.07  | -18.54   | 6952.18 | 46    |
| H3   | -1078.81 | 4043.53  | 7575.49 | 44    |
| H20  | 5768.46  | 1795.49  | 8882.94 | 48    |
| H17  | 9489.81  | -1333.12 | 7406.87 | 53    |
| H5   | -3220.25 | 7707.59  | 6098.58 | 52    |
| H23A | 527.99   | 2614.46  | 5986.91 | 60    |
| H23B | 1644.67  | 942.73   | 6036.99 | 60    |
| H23C | 2516.41  | 2694.61  | 5578.57 | 60    |
| H19  | 8211.01  | 465.63   | 9334.81 | 58    |
| H18  | 10097.89 | -1079.53 | 8586.75 | 55    |
| H4   | -3499.53 | 5612.47  | 7214.7  | 54    |

|     |          |          |          |       |
|-----|----------|----------|----------|-------|
| H30 | 4073.15  | 8082.32  | 9701.94  | 55    |
| H28 | 1739.36  | 3497.41  | 10375.5  | 58    |
| H29 | 2923.17  | 5813.51  | 10673.82 | 59    |
| H9  | 4570(20) | 4680(20) | 5934(10) | 46(5) |

Table S8. The crystal data and structure refinement for **4aa**

|                                    |                                                               |
|------------------------------------|---------------------------------------------------------------|
| Identification code                | 4aa                                                           |
| Empirical formula                  | C <sub>17</sub> H <sub>15</sub> NO <sub>4</sub> S             |
| Formula weight                     | 329.36                                                        |
| Temperature/K                      | 169.97(10)                                                    |
| Crystal system                     | monoclinic                                                    |
| Space group                        | Cc                                                            |
| a/Å                                | 14.3259(2)                                                    |
| b/Å                                | 12.33000(10)                                                  |
| c/Å                                | 10.74620(10)                                                  |
| α/°                                | 90                                                            |
| β/°                                | 125.6130(10)                                                  |
| γ/°                                | 90                                                            |
| Volume/Å <sup>3</sup>              | 1543.17(3)                                                    |
| Z                                  | 4                                                             |
| ρ <sub>calc</sub> /cm <sup>3</sup> | 1.418                                                         |
| μ/mm <sup>-1</sup>                 | 2.047                                                         |
| F(000)                             | 688.0                                                         |
| Crystal size/mm <sup>3</sup>       | 0.25 × 0.18 × 0.15                                            |
| Radiation                          | Cu Kα (λ = 1.54178)                                           |
| 2θ range for data collection/°     | 10.448 to 150.88                                              |
| Index ranges                       | -17 ≤ h ≤ 15, -15 ≤ k ≤ 15, -13 ≤ l ≤ 13                      |
| Reflections collected              | 9397                                                          |
| Independent reflections            | 2351 [R <sub>int</sub> = 0.0203, R <sub>sigma</sub> = 0.0158] |
| Data/restraints/parameters         | 2351/2/213                                                    |

|                                             |                           |
|---------------------------------------------|---------------------------|
| Goodness-of-fit on F2                       | 1.065                     |
| Final R indexes [ $I \geq 2\sigma(I)$ ]     | R1 = 0.0253, wR2 = 0.0651 |
| Final R indexes [all data]                  | R1 = 0.0253, wR2 = 0.0652 |
| Largest diff. peak/hole / e Å <sup>-3</sup> | 0.19/-0.33                |

Table S9. Fractional atomic coordinates ( $\times 10^4$ ) and equivalent isotropic displacement parameters ( $\text{Å}^2 \times 10^3$ ) for **4aa**.  $U_{\text{eq}}$  is defined as 1/3 of of the trace of the orthogonalised  $U_{\text{ij}}$  tensor.

| Atom | X          | y          | z          | U(eq)     |
|------|------------|------------|------------|-----------|
| S1   | 8174.8(4)  | 5836.5(3)  | 7118.3(4)  | 23.69(13) |
| O1   | 8862.6(14) | 6382.0(12) | 6740.9(19) | 33.3(4)   |
| O2   | 8419.8(15) | 6026.1(14) | 8596.2(18) | 36.1(4)   |
| O3   | 5910.0(15) | 4165.3(12) | 2829.9(17) | 30.0(4)   |
| O4   | 4983.7(13) | 4535.7(11) | 4843.8(16) | 26.5(3)   |
| N1   | 6830.9(15) | 6133.8(13) | 5853.8(19) | 21.5(3)   |
| C1   | 6271.9(19) | 5787.4(15) | 4239(2)    | 21.1(4)   |
| C2   | 6489.5(18) | 4583.8(16) | 4094(2)    | 22.6(4)   |
| C3   | 7424(2)    | 3961.0(17) | 5443(2)    | 24.6(4)   |
| C4   | 7514(2)    | 2853.9(17) | 5274(3)    | 32.8(5)   |
| C5   | 8376(3)    | 2247.4(18) | 6485(3)    | 39.9(6)   |
| C6   | 9167(2)    | 2730.0(19) | 7891(3)    | 39.7(5)   |
| C7   | 9104(2)    | 3823.9(19) | 8095(3)    | 32.2(5)   |
| C8   | 8233.2(19) | 4433.8(17) | 6864(2)    | 23.7(4)   |
| C9   | 6708(2)    | 6479.4(18) | 3484(3)    | 29.4(4)   |
| C10  | 4979.2(18) | 5973.4(15) | 3378(2)    | 22.8(4)   |
| C11  | 4413.0(18) | 5236.6(15) | 3884(2)    | 21.7(4)   |
| C12  | 3166.4(18) | 5353.3(15) | 3170(2)    | 22.9(4)   |
| C13  | 2496(2)    | 6139.5(17) | 2059(2)    | 28.7(4)   |
| C14  | 1333(2)    | 6198.6(19) | 1396(3)    | 33.0(5)   |
| C15  | 824(2)     | 5495(2)    | 1835(3)    | 31.7(5)   |

|     |         |            |         |         |
|-----|---------|------------|---------|---------|
| C16 | 1492(2) | 4713(2)    | 2957(3) | 38.5(5) |
| C17 | 2647(2) | 4642.2(19) | 3609(3) | 32.6(5) |

Table S10. Anisotropic Displacement Parameters ( $\text{\AA}^2 \times 10^3$ ) for **4aa**. The Anisotropic displacement factor exponent takes the form:  $-2 \pi^2 [h^2 a^2 U_{11} + 2hka^* b^* U_{12} + \dots]$

| Atom | U11      | U22      | U33      | U23       | U13      | U12      |
|------|----------|----------|----------|-----------|----------|----------|
| S1   | 16.4(2)  | 26.2(2)  | 24.1(2)  | -4.53(18) | 9.35(18) | 0.33(18) |
| O1   | 22.1(8)  | 30.5(7)  | 45.0(9)  | -3.2(6)   | 18.3(7)  | -4.6(6)  |
| O2   | 26.4(9)  | 47.9(9)  | 23.4(8)  | -8.4(6)   | 8.5(7)   | 7.5(7)   |
| O3   | 32.4(9)  | 30.4(8)  | 25.1(8)  | -6.2(5)   | 15.5(7)  | -3.9(6)  |
| O4   | 22.3(8)  | 26.2(6)  | 24.2(7)  | 4.2(6)    | 9.8(6)   | 1.0(6)   |
| N1   | 18.0(9)  | 24.5(7)  | 21.5(8)  | -3.8(6)   | 11.2(7)  | -0.4(7)  |
| C1   | 19.2(10) | 22.3(9)  | 19.2(10) | -0.7(6)   | 9.7(8)   | -0.9(7)  |
| C2   | 23.6(10) | 24.3(9)  | 23.7(10) | -3.5(7)   | 16.0(9)  | -3.6(8)  |
| C3   | 28.0(11) | 23.7(9)  | 27.6(10) | -0.3(7)   | 19.3(9)  | 0.4(8)   |
| C4   | 43.5(13) | 24.3(10) | 37.6(11) | 0.3(8)    | 27.6(11) | 0.7(9)   |
| C5   | 53.2(16) | 24.1(10) | 48.8(14) | 7.3(10)   | 33.3(13) | 8.6(11)  |
| C6   | 41.2(14) | 34.3(12) | 43.2(13) | 15.3(10)  | 24.5(11) | 14.1(10) |
| C7   | 26.6(12) | 36.6(11) | 29.6(11) | 5.9(9)    | 14.3(9)  | 5.0(10)  |
| C8   | 21.4(10) | 25.7(8)  | 26.9(11) | 3.2(7)    | 15.7(8)  | 4.2(8)   |
| C9   | 32.5(12) | 29.3(10) | 30.5(10) | 0.1(8)    | 20.7(9)  | -4.7(9)  |
| C10  | 18.8(11) | 22.9(9)  | 22.7(10) | 2.1(7)    | 9.9(9)   | 0.2(7)   |
| C11  | 20.4(10) | 21.3(8)  | 18.8(8)  | -2.1(7)   | 8.8(7)   | -1.7(7)  |
| C12  | 19.8(10) | 25.0(9)  | 20.5(9)  | -2.0(7)   | 9.8(8)   | -1.8(7)  |
| C13  | 25.5(11) | 26.7(10) | 31.8(11) | 4.3(8)    | 15.4(10) | 1.2(8)   |
| C14  | 23.6(11) | 35.7(11) | 32.8(11) | 5.9(9)    | 12.4(9)  | 5.7(9)   |
| C15  | 19.8(11) | 42.2(11) | 31.5(11) | -1.6(9)   | 14.0(9)  | 1.5(9)   |
| C16  | 27.3(12) | 49.1(13) | 39.7(12) | 9.9(10)   | 19.9(11) | -2.2(11) |
| C17  | 24.6(11) | 38.2(12) | 30.5(11) | 9.4(9)    | 13.5(9)  | 1.2(9)   |

Table S11. Bond lengths for **4aa**.

| Atom | Atom | Length/Å   | Atom | Atom | Length/Å |
|------|------|------------|------|------|----------|
| S1   | O1   | 1.4328(17) | C4   | C5   | 1.381(3) |
| S1   | O2   | 1.4321(17) | C5   | C6   | 1.388(4) |
| S1   | N1   | 1.6250(19) | C6   | C7   | 1.378(3) |
| S1   | C8   | 1.761(2)   | C7   | C8   | 1.396(3) |
| O3   | C2   | 1.219(2)   | C10  | C11  | 1.515(3) |
| O4   | C11  | 1.223(2)   | C11  | C12  | 1.484(3) |
| N1   | C1   | 1.489(3)   | C12  | C13  | 1.397(3) |
| C1   | C2   | 1.543(3)   | C12  | C17  | 1.398(3) |
| C1   | C9   | 1.538(3)   | C13  | C14  | 1.381(3) |
| C1   | C10  | 1.531(3)   | C14  | C15  | 1.382(3) |
| C2   | C3   | 1.491(3)   | C15  | C16  | 1.398(3) |
| C3   | C4   | 1.393(3)   | C16  | C17  | 1.373(3) |
| C3   | C8   | 1.398(3)   |      |      |          |

Table S12. Bond angles for **4aa**.

| Atom | Atom | Atom | Angle/°    | Atom | Atom | Atom | Angle/°    |
|------|------|------|------------|------|------|------|------------|
| O1   | S1   | N1   | 109.42(9)  | C5   | C4   | C3   | 120.5(2)   |
| O1   | S1   | C8   | 108.32(9)  | C4   | C5   | C6   | 120.6(2)   |
| O2   | S1   | O1   | 118.19(10) | C7   | C6   | C5   | 120.3(2)   |
| O2   | S1   | N1   | 107.25(9)  | C6   | C7   | C8   | 118.8(2)   |
| O2   | S1   | C8   | 109.25(10) | C3   | C8   | S1   | 119.68(15) |
| N1   | S1   | C8   | 103.42(9)  | C7   | C8   | S1   | 118.61(17) |
| C1   | N1   | S1   | 118.76(13) | C7   | C8   | C3   | 121.7(2)   |
| N1   | C1   | C2   | 112.98(16) | C11  | C10  | C1   | 113.94(16) |
| N1   | C1   | C9   | 110.34(16) | O4   | C11  | C10  | 119.45(18) |
| N1   | C1   | C10  | 107.56(16) | O4   | C11  | C12  | 121.13(17) |
| C9   | C1   | C2   | 108.20(16) | C12  | C11  | C10  | 119.39(17) |
| C10  | C1   | C2   | 109.12(16) | C13  | C12  | C11  | 122.04(18) |

|     |    |    |            |     |     |     |            |
|-----|----|----|------------|-----|-----|-----|------------|
| C10 | C1 | C9 | 108.55(17) | C13 | C12 | C17 | 119.2(2)   |
| O3  | C2 | C1 | 118.23(18) | C17 | C12 | C11 | 118.75(18) |
| O3  | C2 | C3 | 120.57(18) | C14 | C13 | C12 | 120.0(2)   |
| C3  | C2 | C1 | 121.12(17) | C13 | C14 | C15 | 120.6(2)   |
| C4  | C3 | C2 | 118.46(19) | C14 | C15 | C16 | 119.6(2)   |
| C4  | C3 | C8 | 118.1(2)   | C17 | C16 | C15 | 120.1(2)   |
| C8  | C3 | C2 | 123.47(18) | C16 | C17 | C12 | 120.5(2)   |

Table S13. Torsion angles for **4aa**.

| A  | B   | C   | D   | Angle/°         | A   | B  | C   | D   | Angle/°         |
|----|-----|-----|-----|-----------------|-----|----|-----|-----|-----------------|
| S1 | N1  | C1  | C2  | 48.8(2)         | C2  | C3 | C8  | C7  | -<br>179.25(19) |
| S1 | N1  | C1  | C9  | -72.42(19)      | C3  | C4 | C5  | C6  | 0.0(4)          |
| S1 | N1  | C1  | C10 | 169.34(12)      | C4  | C3 | C8  | S1  | 178.51(16)      |
| O1 | S1  | N1  | C1  | 63.91(16)       | C4  | C3 | C8  | C7  | -0.7(3)         |
| O1 | S1  | C8  | C3  | -90.06(18)      | C4  | C5 | C6  | C7  | -0.2(4)         |
| O1 | S1  | C8  | C7  | 89.22(18)       | C5  | C6 | C7  | C8  | -0.1(4)         |
| O2 | S1  | N1  | C1  | -<br>166.75(14) | C6  | C7 | C8  | S1  | -<br>178.66(19) |
| O2 | S1  | C8  | C3  | 139.95(17)      | C6  | C7 | C8  | C3  | 0.6(3)          |
| O2 | S1  | C8  | C7  | -40.8(2)        | C8  | S1 | N1  | C1  | -51.34(16)      |
| O3 | C2  | C3  | C4  | -9.0(3)         | C8  | C3 | C4  | C5  | 0.4(3)          |
| O3 | C2  | C3  | C8  | 169.56(19)      | C9  | C1 | C2  | O3  | -70.6(2)        |
| O4 | C11 | C12 | C13 | -<br>179.21(18) | C9  | C1 | C2  | C3  | 106.2(2)        |
| O4 | C11 | C12 | C17 | -0.2(3)         | C9  | C1 | C10 | C11 | 173.01(16)      |
| N1 | S1  | C8  | C3  | 25.99(18)       | C10 | C1 | C2  | O3  | 47.3(2)         |
| N1 | S1  | C8  | C7  | -<br>154.74(17) | C10 | C1 | C2  | C3  | -<br>135.87(18) |

|    |     |     |     |            |     |     |     |     |            |
|----|-----|-----|-----|------------|-----|-----|-----|-----|------------|
| N1 | C1  | C2  | O3  | 166.93(18) | C10 | C11 | C12 | C13 | -1.3(3)    |
| N1 | C1  | C2  | C3  | -16.3(3)   | C10 | C11 | C12 | C17 | 177.73(18) |
| N1 | C1  | C10 | C11 | -67.6(2)   | C11 | C12 | C13 | C14 | 178.27(19) |
| C1 | C2  | C3  | C4  | 174.33(19) | C11 | C12 | C17 | C16 | -179.0(2)  |
| C1 | C2  | C3  | C8  | -7.2(3)    | C12 | C13 | C14 | C15 | 0.8(3)     |
| C1 | C10 | C11 | O4  | -3.7(3)    | C13 | C12 | C17 | C16 | 0.1(3)     |
| C1 | C10 | C11 | C12 | 178.37(16) | C13 | C14 | C15 | C16 | -0.3(4)    |
| C2 | C1  | C10 | C11 | 55.3(2)    | C14 | C15 | C16 | C17 | -0.4(4)    |
| C2 | C3  | C4  | C5  | 179.0(2)   | C15 | C16 | C17 | C12 | 0.5(4)     |
| C2 | C3  | C8  | S1  | 0.0(3)     | C17 | C12 | C13 | C14 | -0.7(3)    |

Table S14. Hydrogen Atom Coordinates ( $\text{\AA} \times 10^4$ ) and Isotropic Displacement Parameters ( $\text{\AA}^2 \times 10^3$ ) for **4aa**.

| Atom | x        | y        | z        | U(eq) |
|------|----------|----------|----------|-------|
| H1   | 6500(30) | 5970(20) | 6230(30) | 25(7) |
| H4   | 6988.56  | 2520.51  | 4338.32  | 39    |
| H5   | 8427.35  | 1508.94  | 6358.19  | 48    |
| H6   | 9742.99  | 2312.93  | 8699.59  | 48    |
| H7   | 9631.14  | 4150.11  | 9035.33  | 39    |
| H9A  | 6586.96  | 7233.16  | 3571.62  | 44    |
| H9B  | 6295.84  | 6288.24  | 2421.97  | 44    |
| H9C  | 7512.52  | 6348.71  | 3986.62  | 44    |
| H10A | 4850.3   | 6721.14  | 3521.42  | 27    |
| H10B | 4613.84  | 5864.38  | 2292.99  | 27    |
| H13  | 2833.27  | 6622.84  | 1765.19  | 34    |
| H14  | 888.06   | 6716.97  | 647.12   | 40    |
| H15  | 40.55    | 5540.58  | 1387.71  | 38    |
| H16  | 1154.89  | 4240.1   | 3261.34  | 46    |
| H17  | 3087.5   | 4117.16  | 4348.64  | 39    |



## The $^1\text{H}$ NMR, $^{13}\text{C}$ NMR, $^{19}\text{F}$ NMR and HRMS spectra of compound 3 and 4

1) ((3*R*\*,4*S*\*)-4'-Methyl-1,1-dioxido-6'-phenyl-4',5'-dihydro-2*H*,2'*H*-spiro[benzo[*d*]isothiazole-3,3'-pyridazin]-2'-yl)(phenyl)methanone (**3aa**).

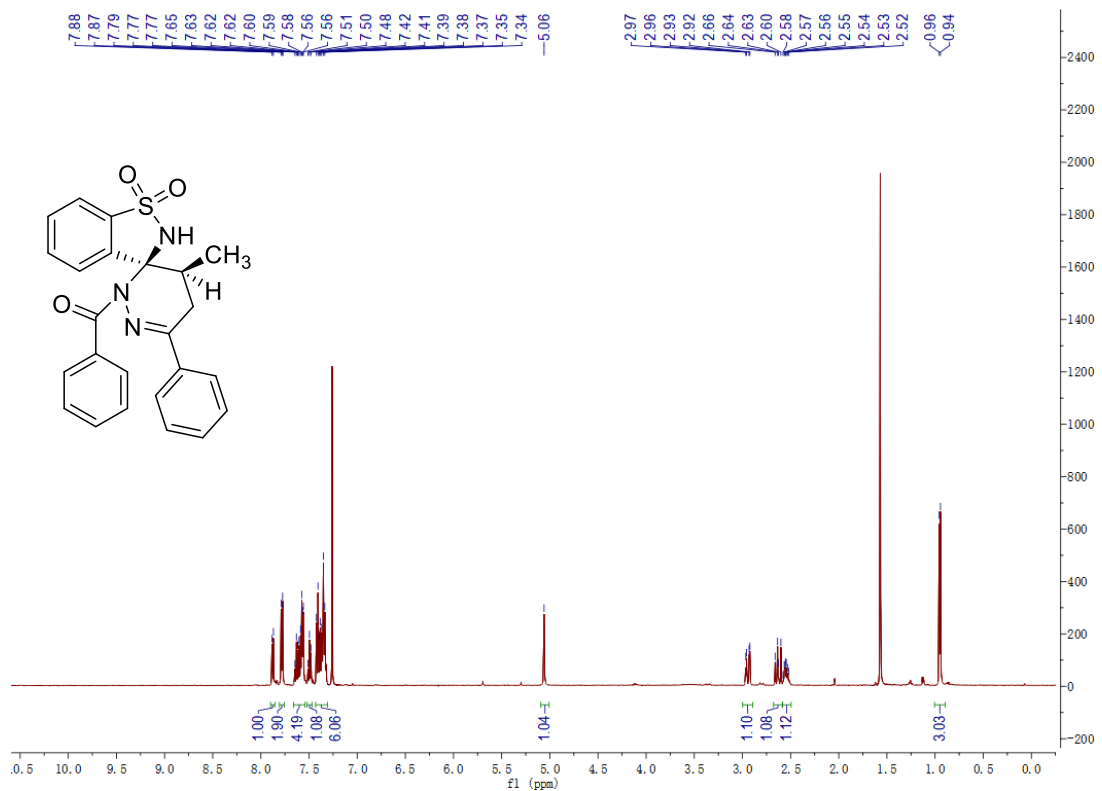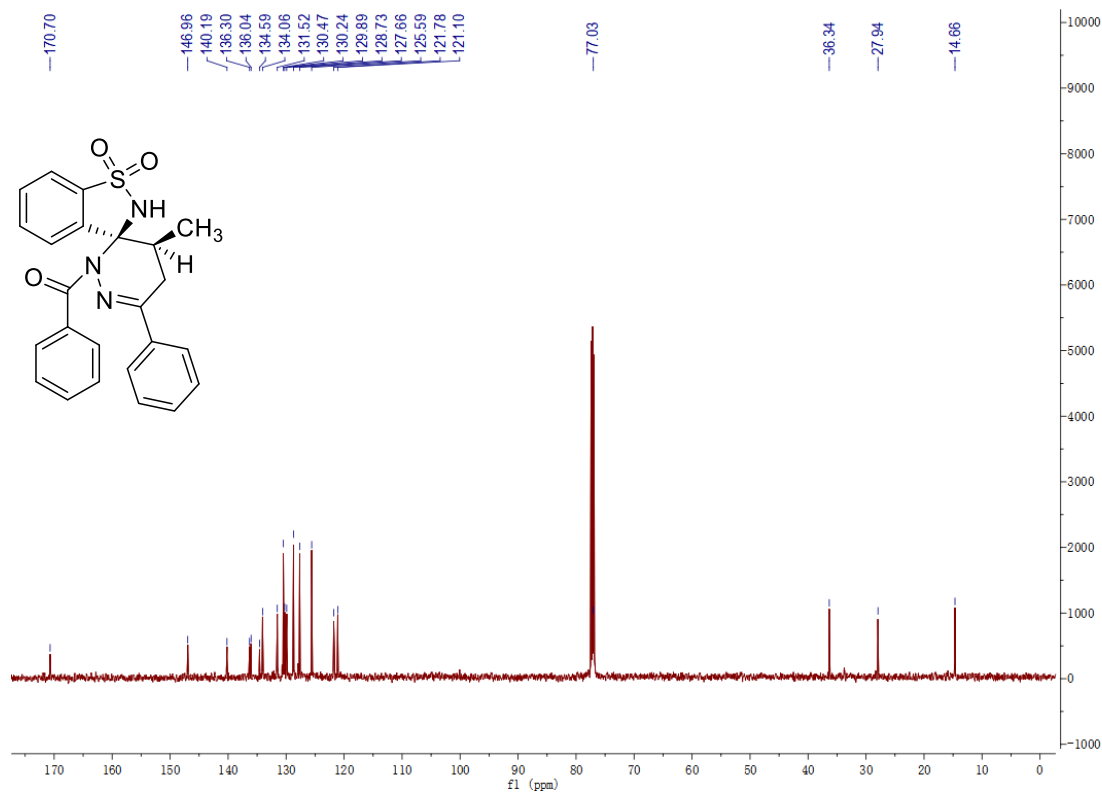

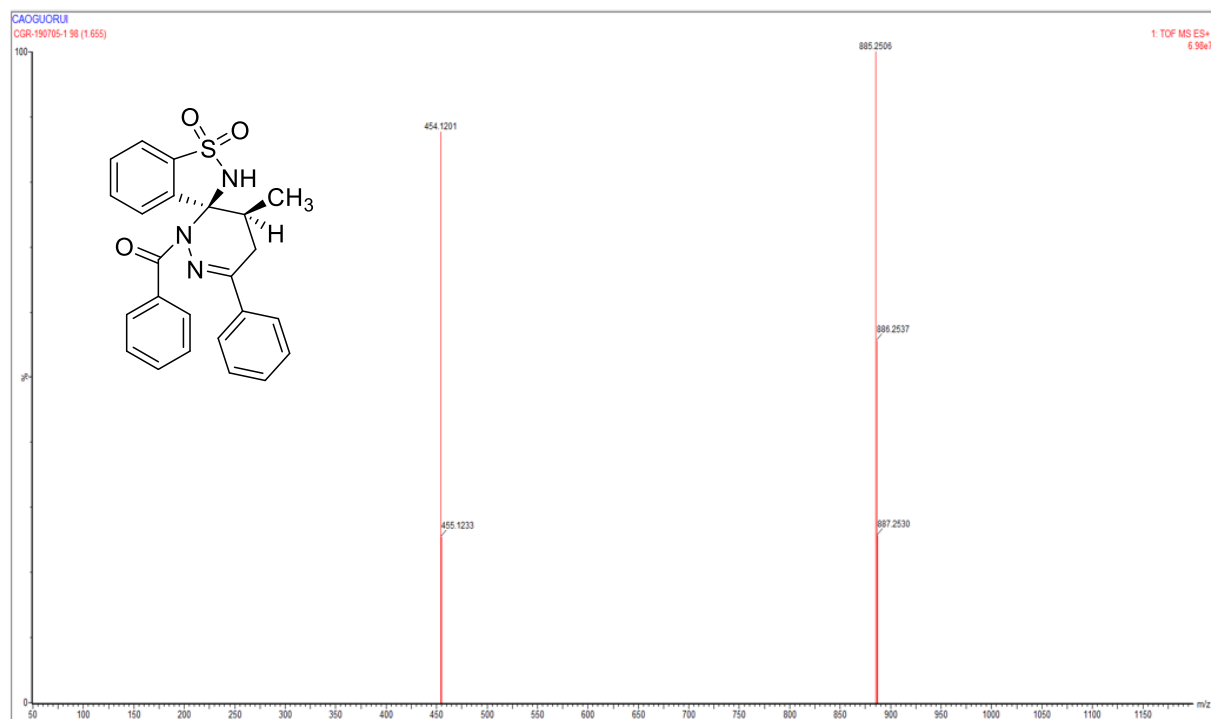

2) ((3*R*\*,4'*S*'\*)-4'-Methyl-1,1-dioxido-6'-(*p*-tolyl)-4',5'-dihydro-2*H*,2'*H*-spiro[benzo[*d*]isothiazole-3,3'-pyridazin]-2'-yl)(phenyl)methanone (**3ab**)

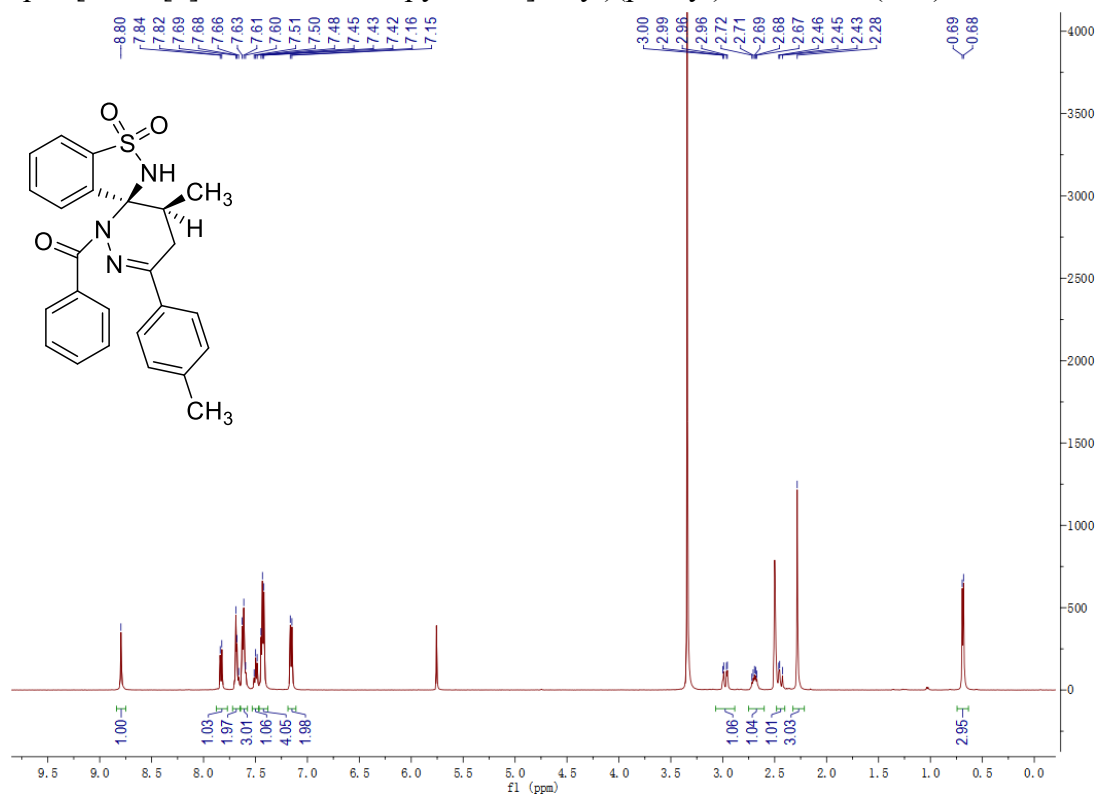

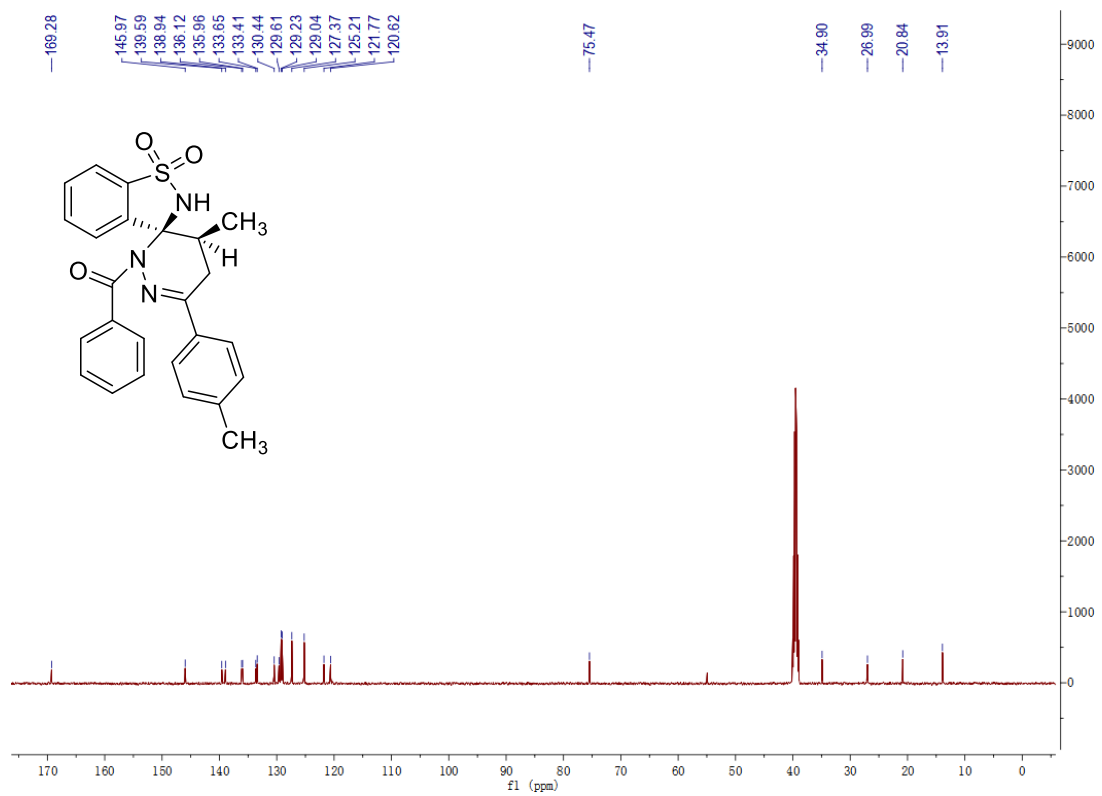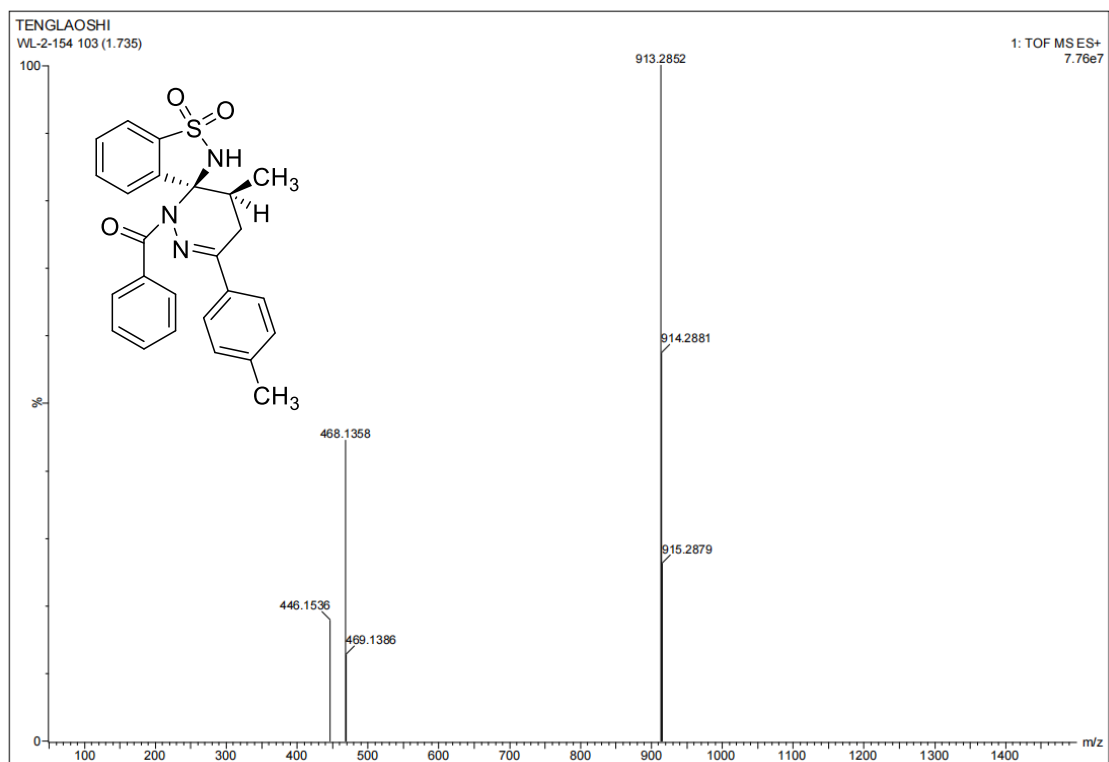

3) ((3*R*\*,4'*S*'\*)-6'-(4-Methoxyphenyl)-4'-methyl-1,1-dioxido-4',5'-dihydro-2*H*,2'*H*-spiro[benzo[*d*]isothiazole-3,3'-pyridazin]-2'-yl)(phenyl)methanone (**3ac**)

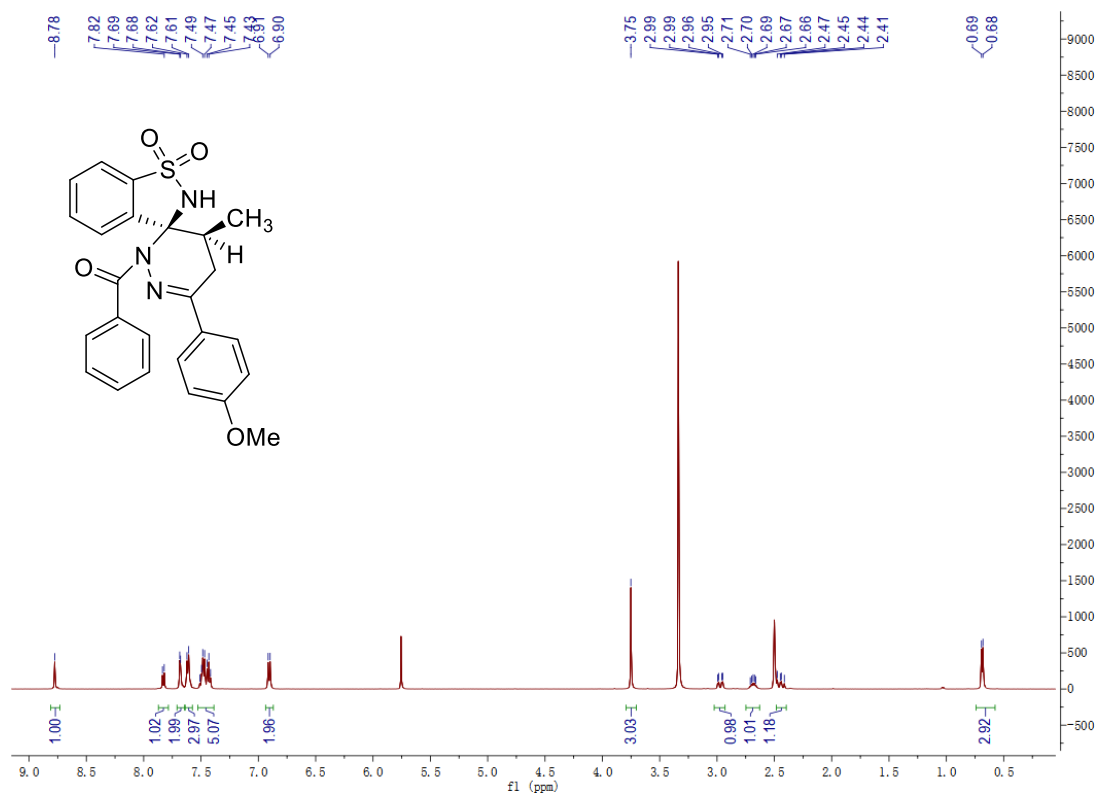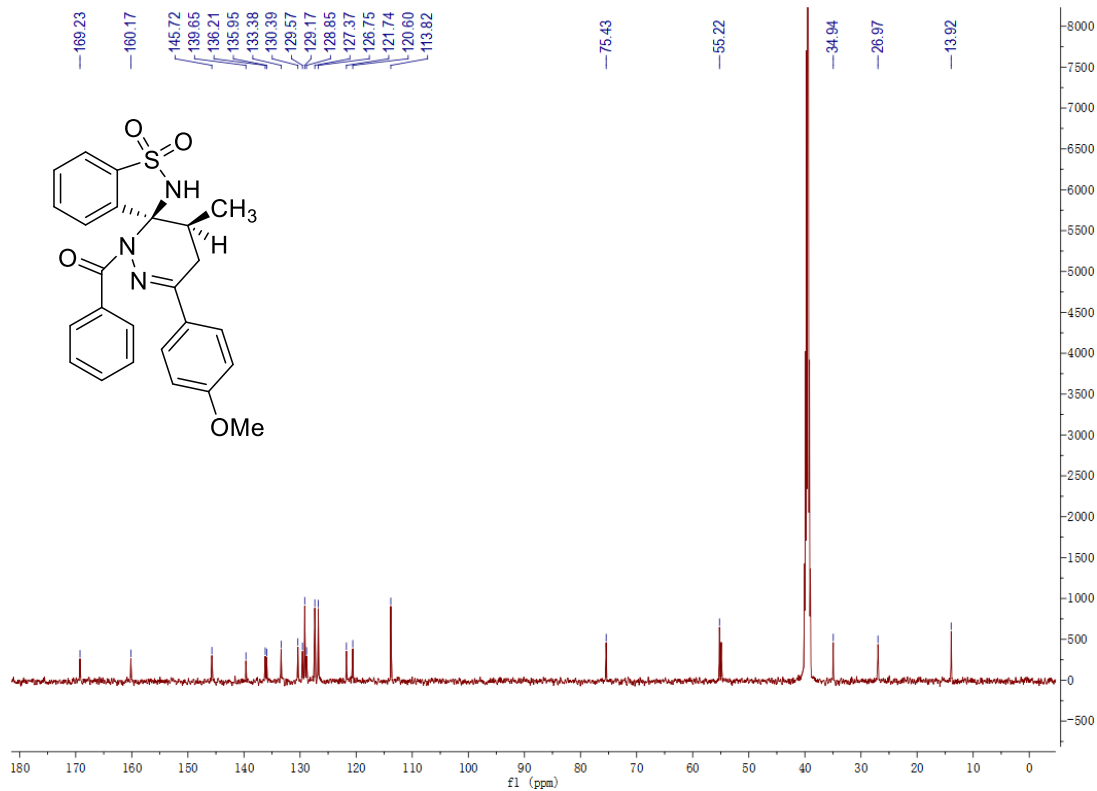

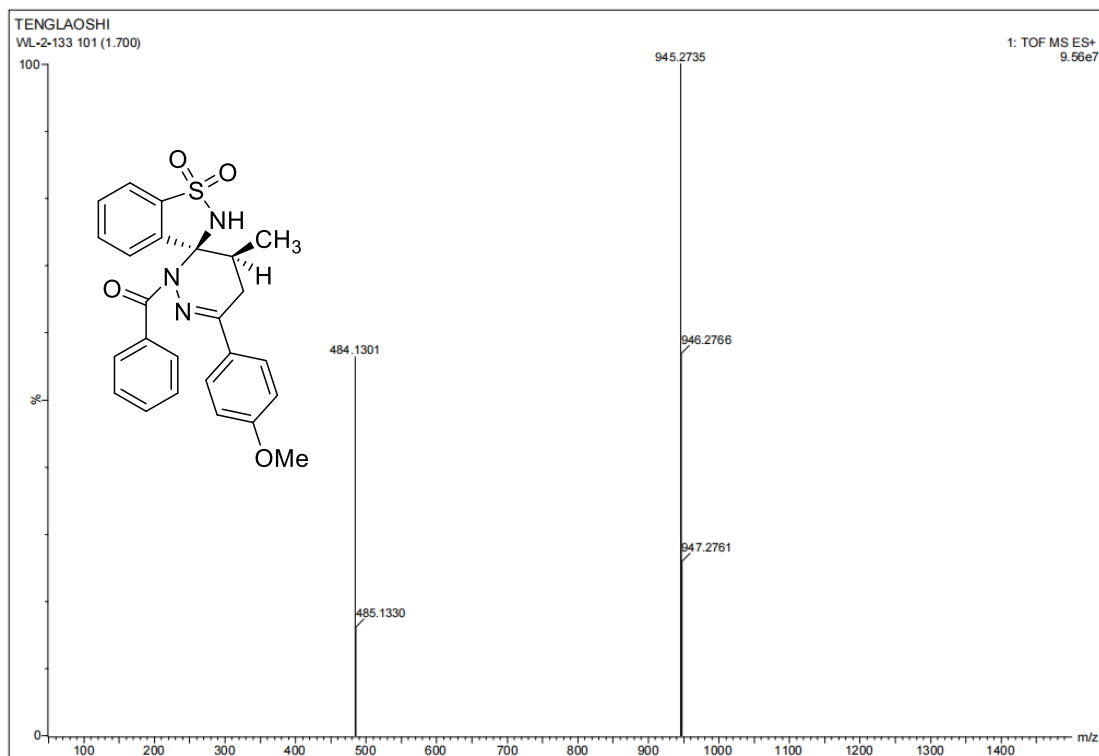

4) ((3*R*\*,4*S*'\*)-6'-(4-Fluorophenyl)-4'-methyl-1,1-dioxido-4',5'-dihydro-2*H*,2'*H*-spiro[benzo[*d*]isothiazole-3,3'-pyridazin]-2'-yl)(phenyl)methanone (**3ad**)

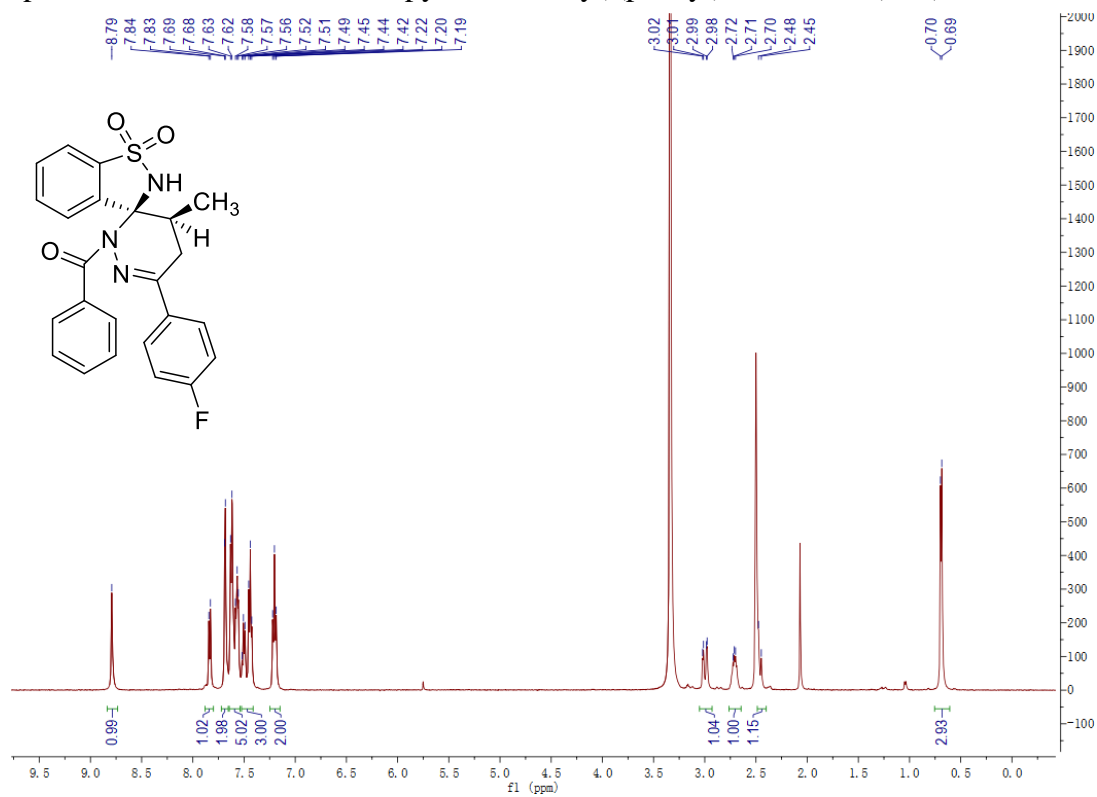

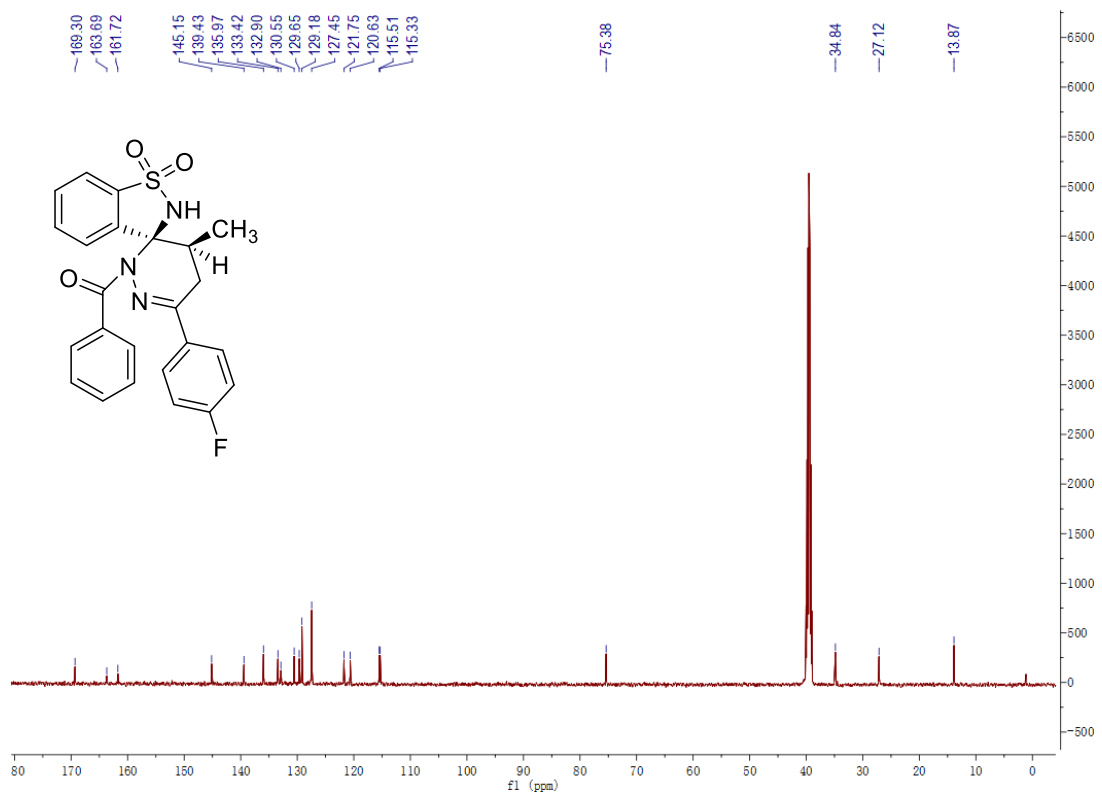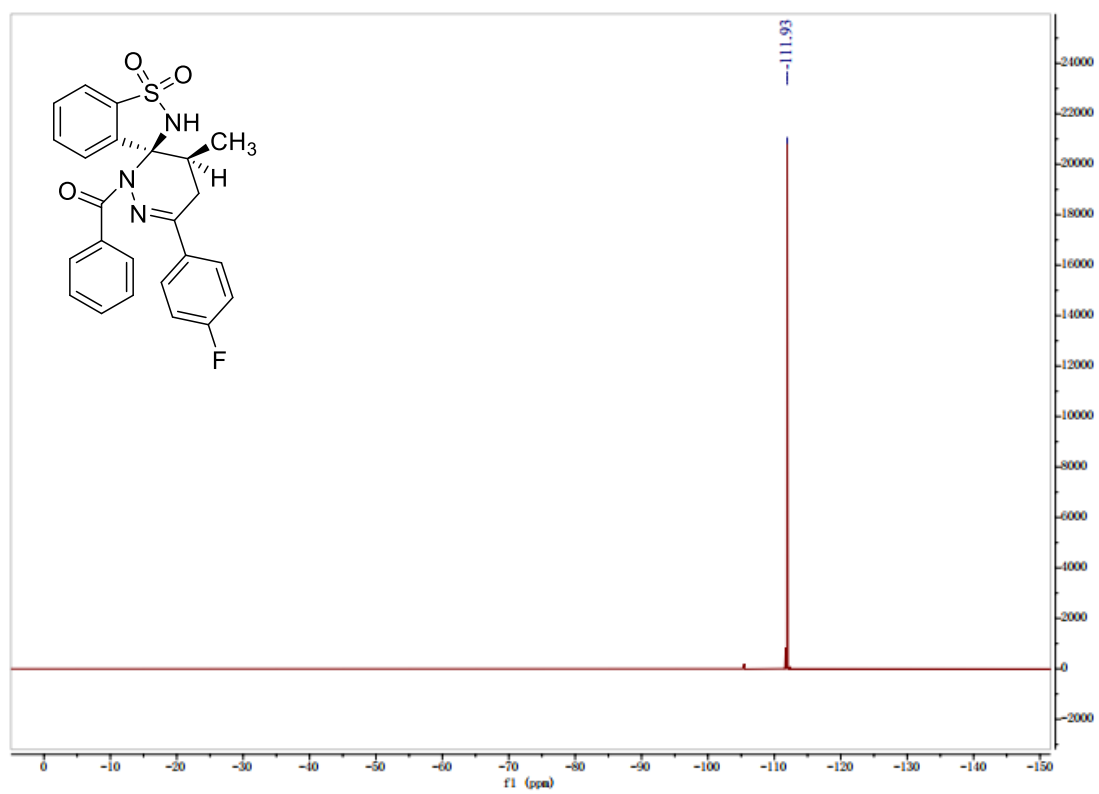

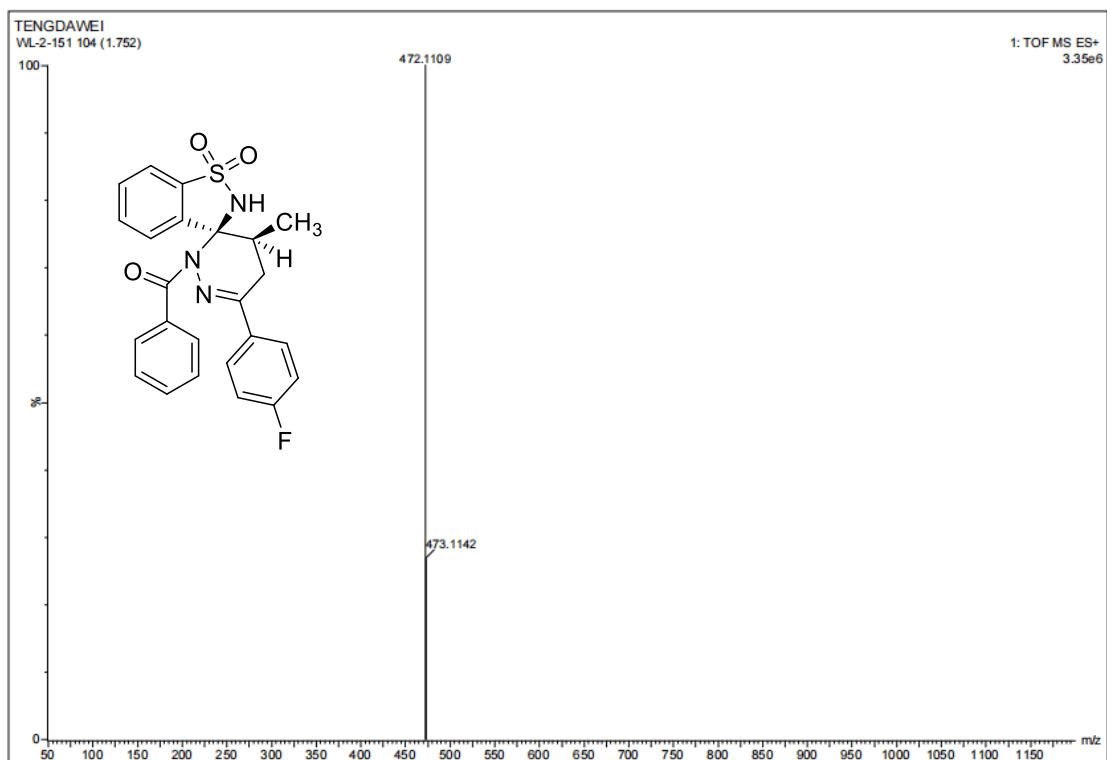

5) ((3*R*\*,4*S*\*)-6'-(4-Chlorophenyl)-4'-methyl-1,1-dioxido-4',5'-dihydro-2*H*,2'*H*-spiro[benzo[*d*]isothiazole-3,3'-pyridazin]-2'-yl)(phenyl)methanone (**3ae**)

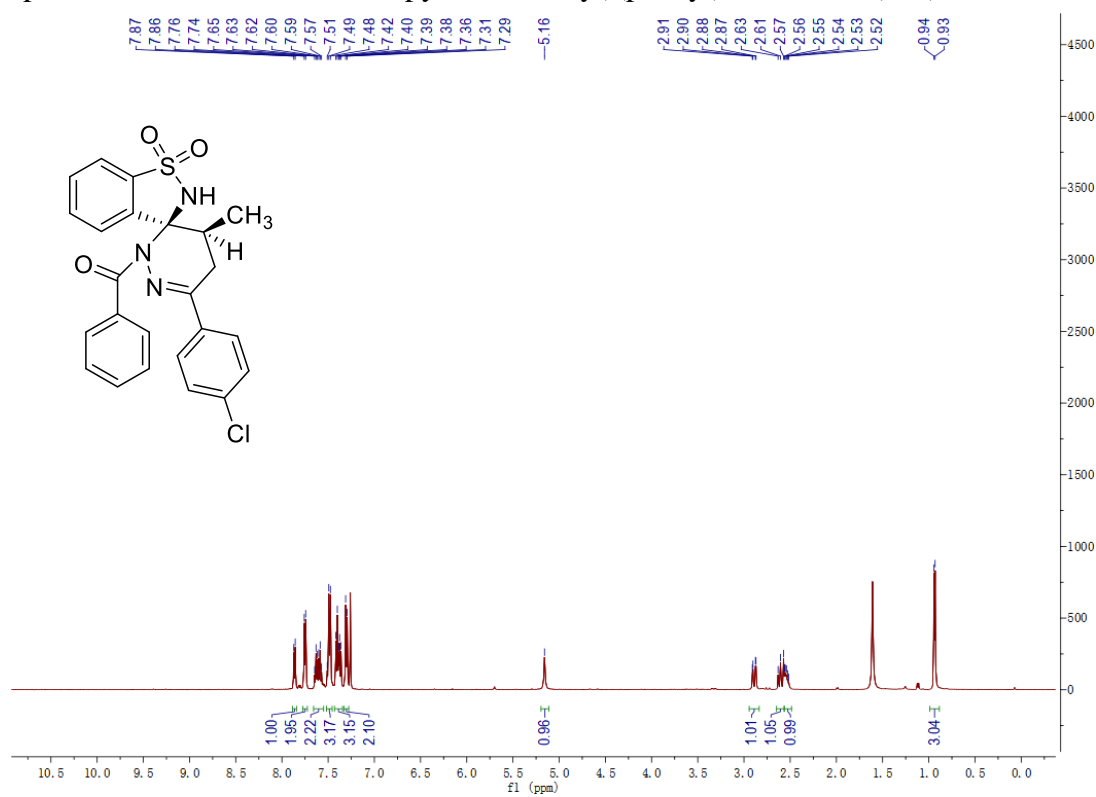

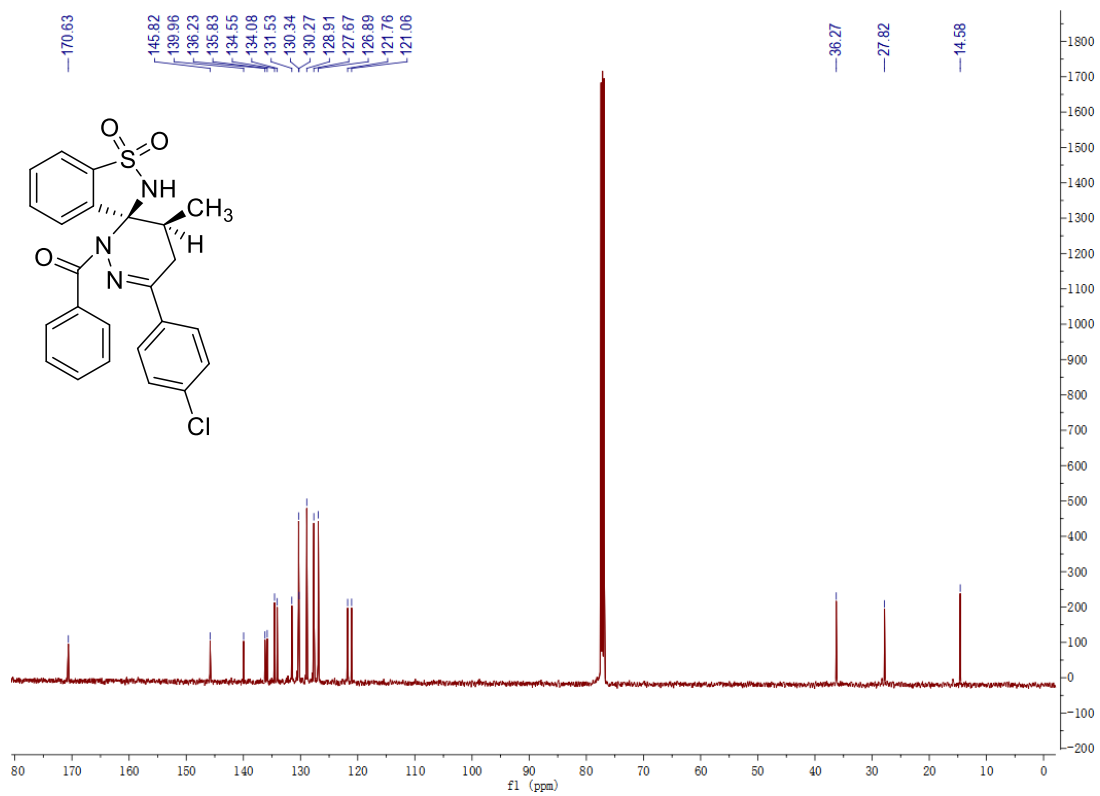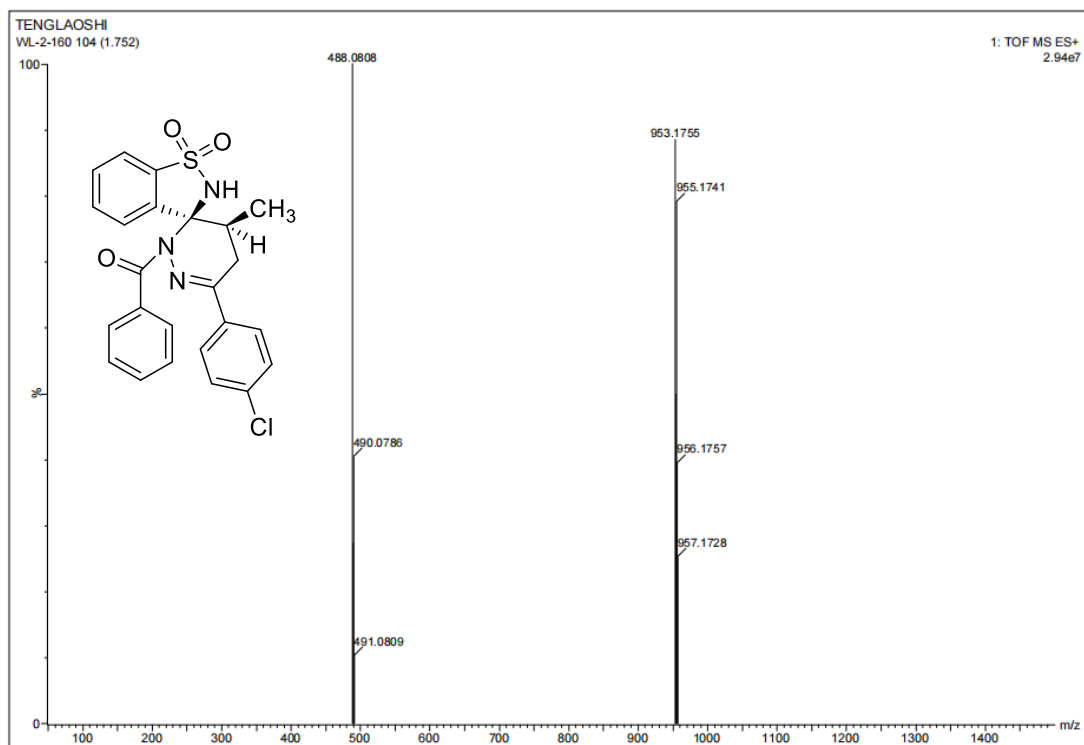



6) ((3*R*\*,4*S*'\*)-6'-(4-Bromophenyl)-4'-methyl-1,1-dioxido-4',5'-dihydro-2*H*,2'*H*-spiro[benzo[*d*]isothiazole-3,3'-pyridazin]-2'-yl)(phenyl)methanone (**3af**)

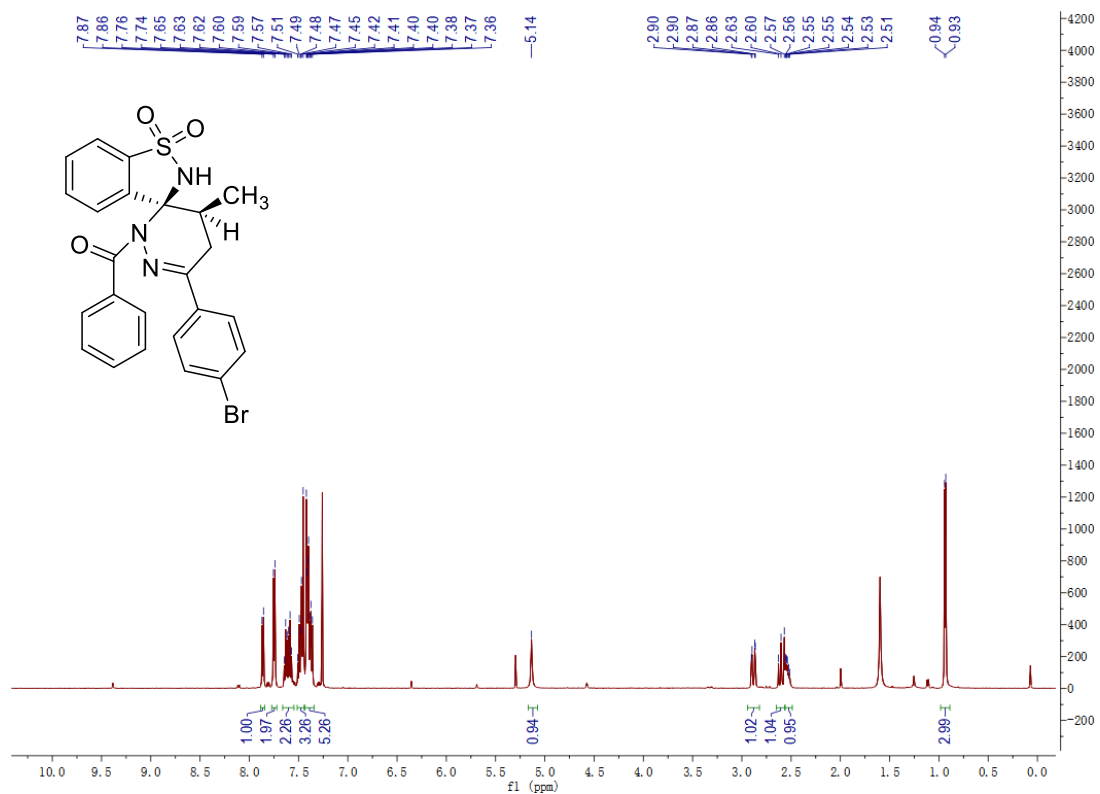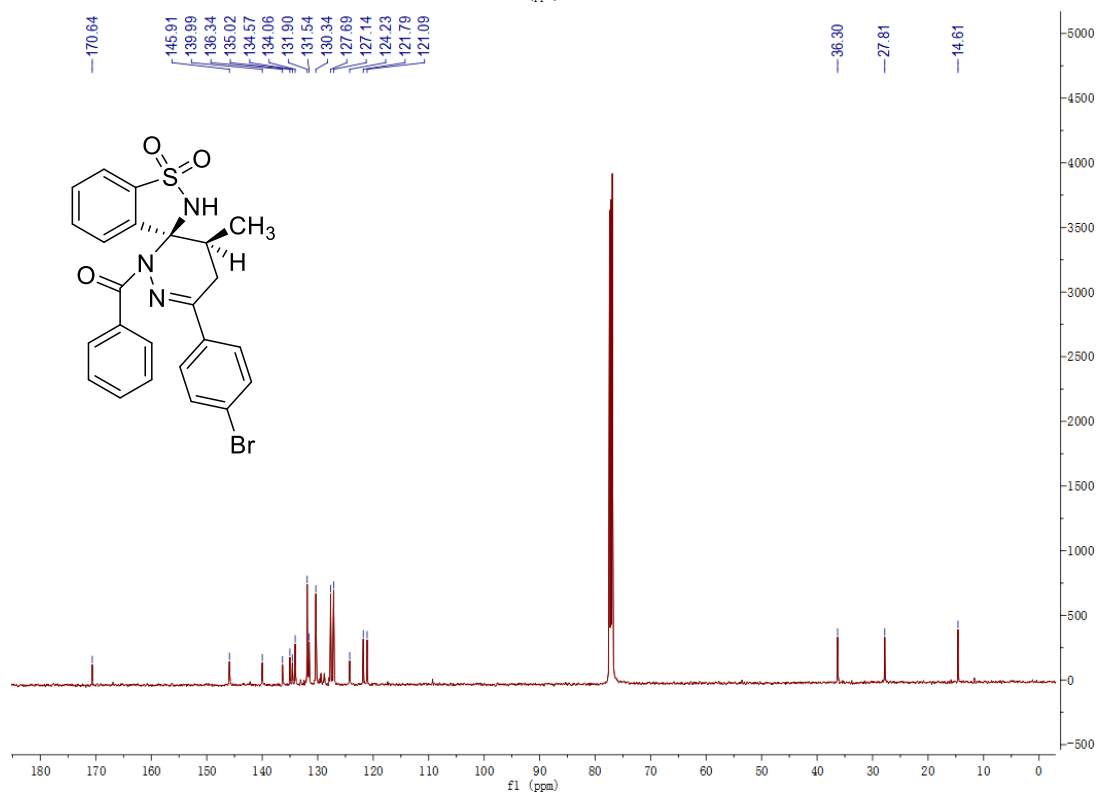

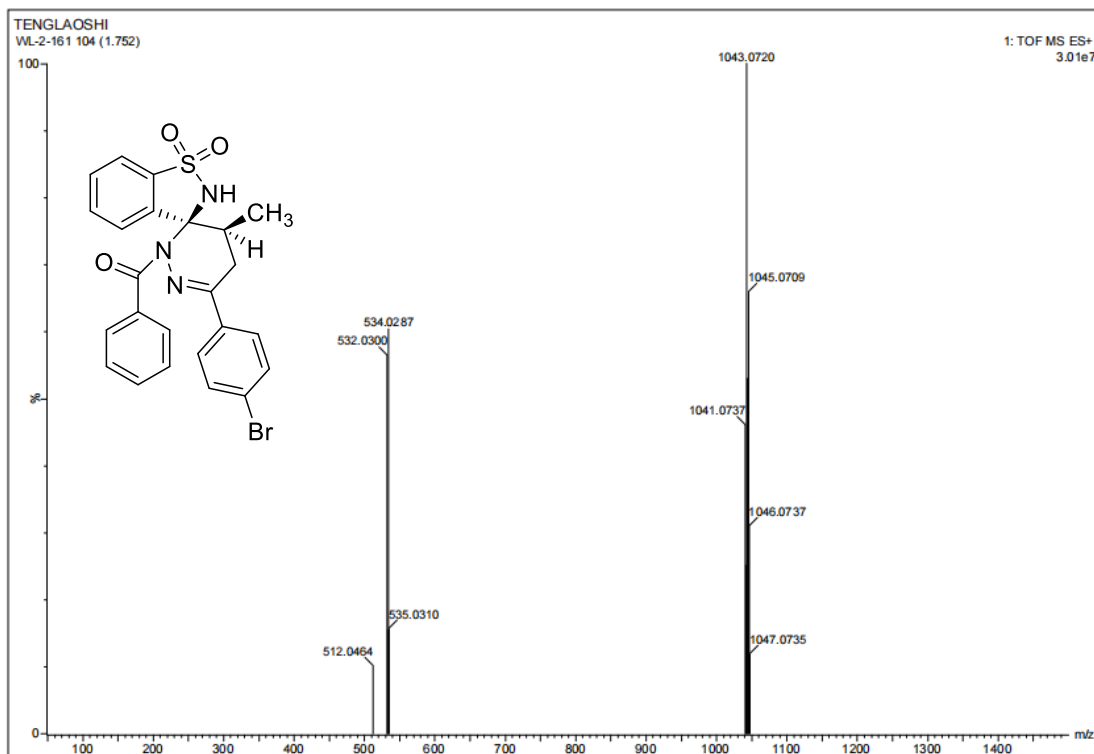

7) ((3*R*\*,4*S*\*)-4'-Methyl-6'-(4-nitrophenyl)-1,1-dioxido-4',5'-dihydro-2*H*,2'*H*-spiro[benzo[*d*]isothiazole-3,3'-pyridazin]-2'-yl)(phenyl)methanone (**3ag**)

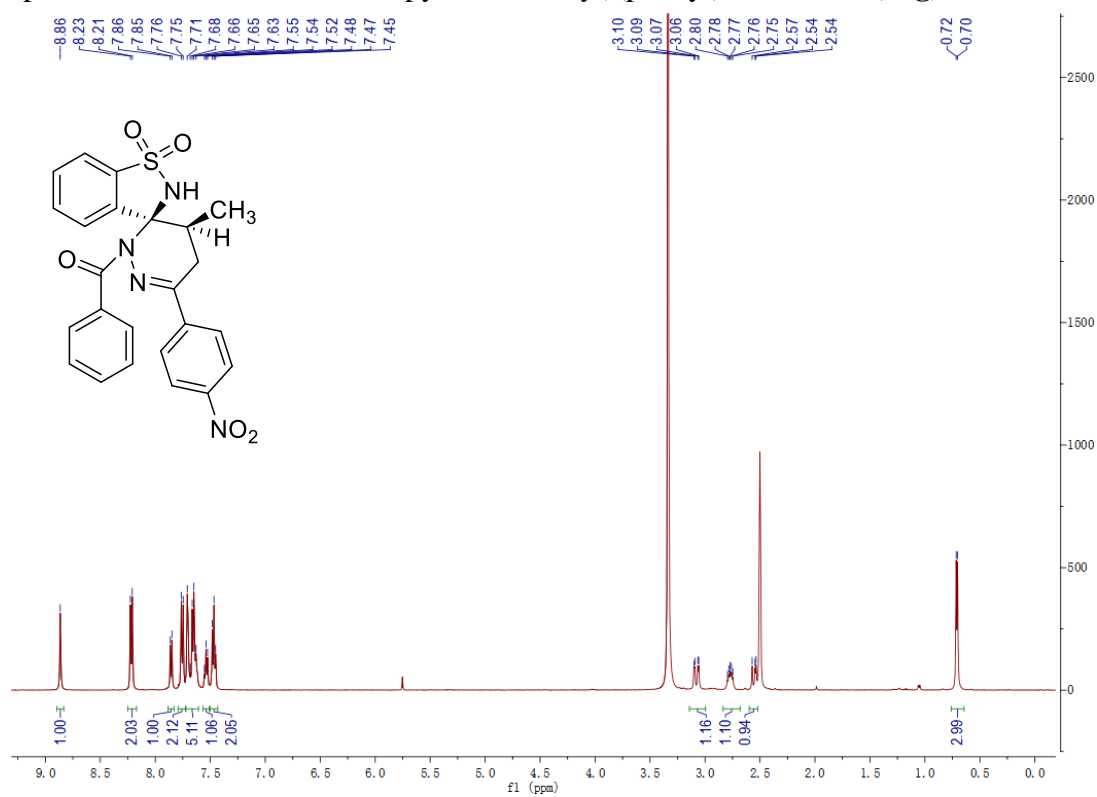

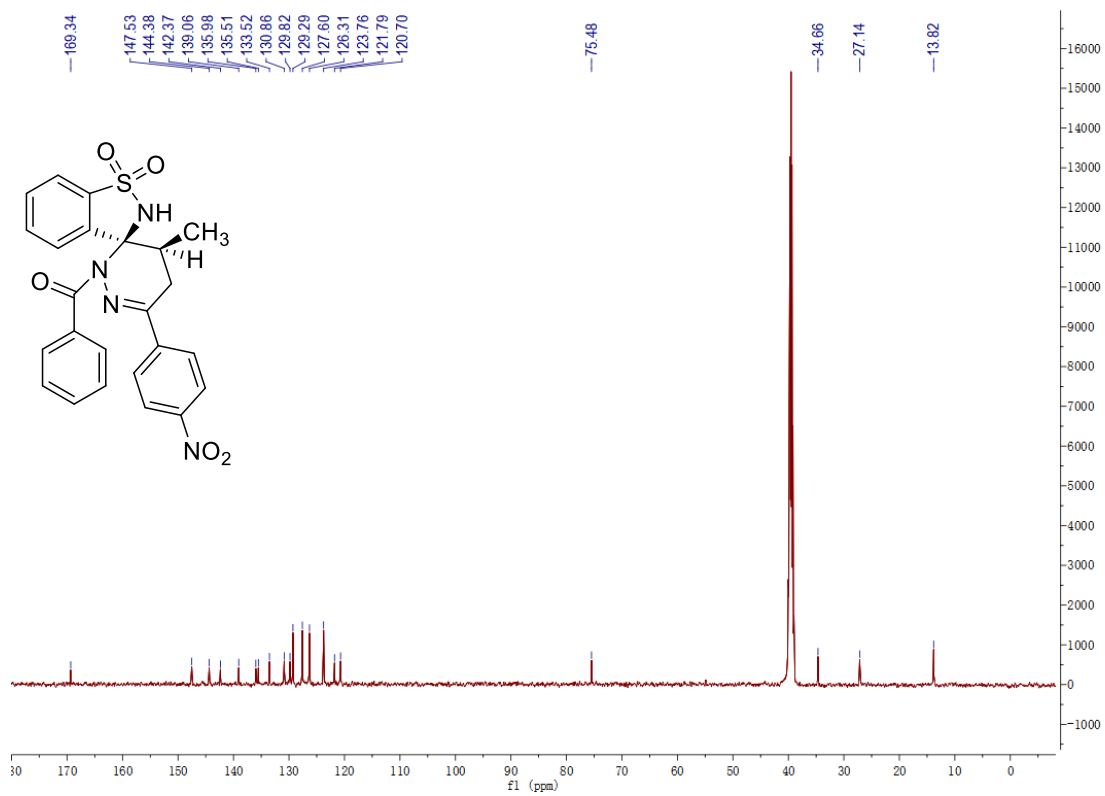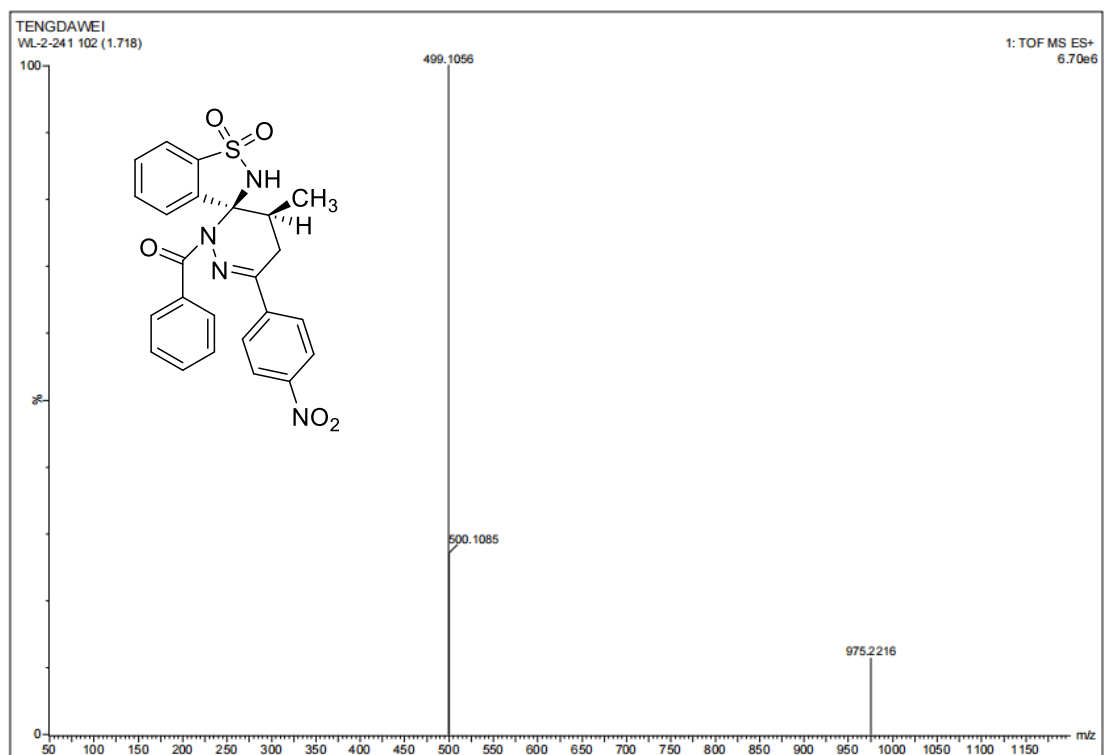

8) ((3*R*\*,4*S*'-4'-Methyl-1,1-dioxido-6'-phenyl-4',5'-dihydro-2*H*,2'*H*-spiro[benzo[*d*]isothiazole-3,3'-pyridazin]-2'-yl)(*p*-tolyl)methanone (**3ah**)

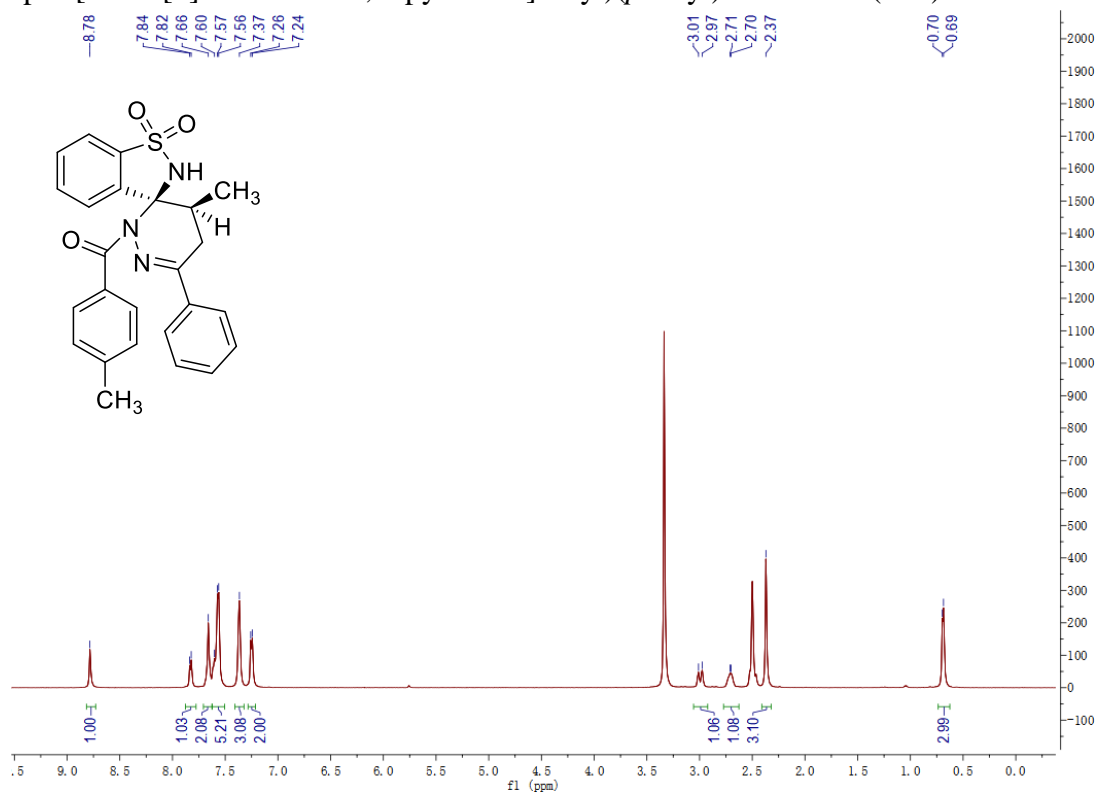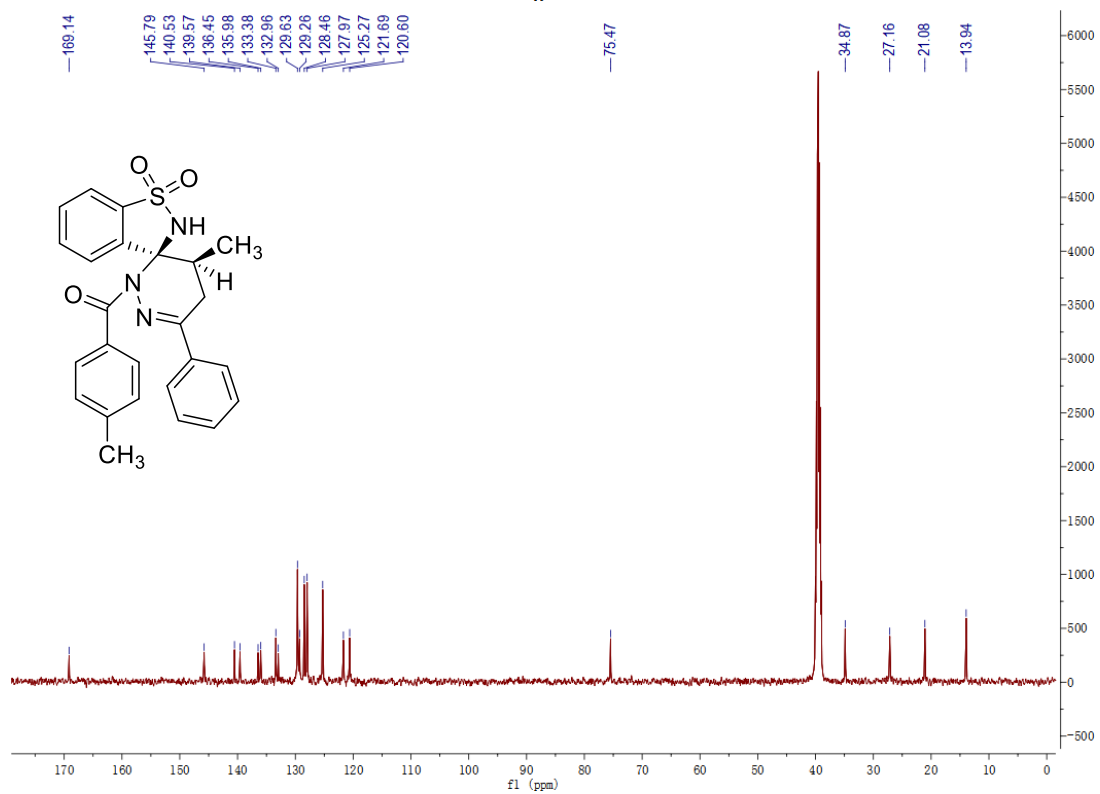

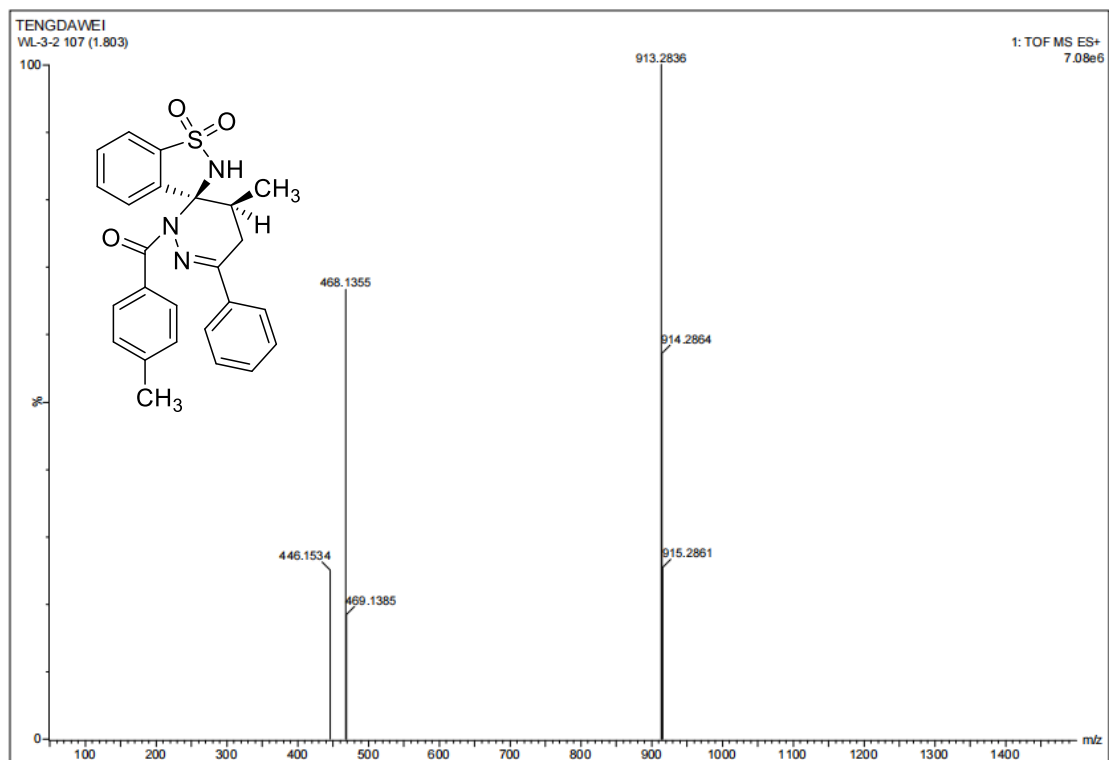

9) (4-Methoxyphenyl)((3*R*\*,4'*S*'\*)-4'-methyl-1,1-dioxido-6'-phenyl-4',5'-dihydro-2*H*,2'*H*-spiro[benzo[*d*]isothiazole-3,3'-pyridazin]-2'-yl)methanone (**3ai**)

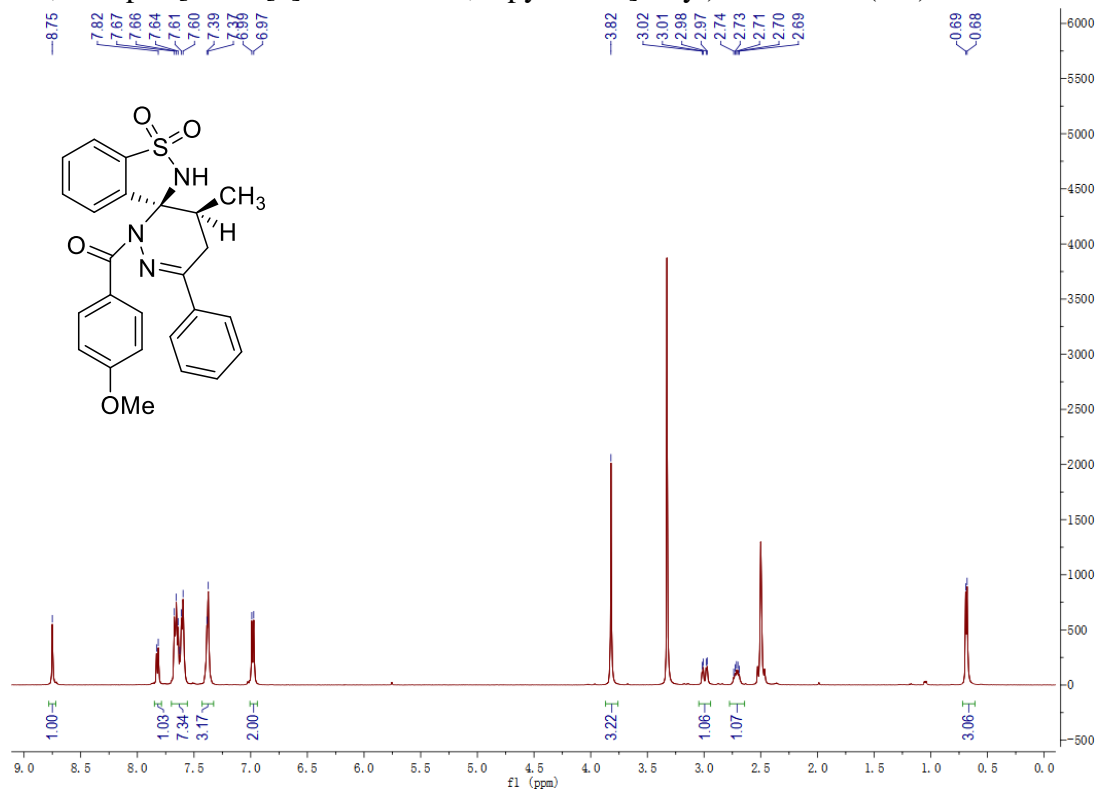

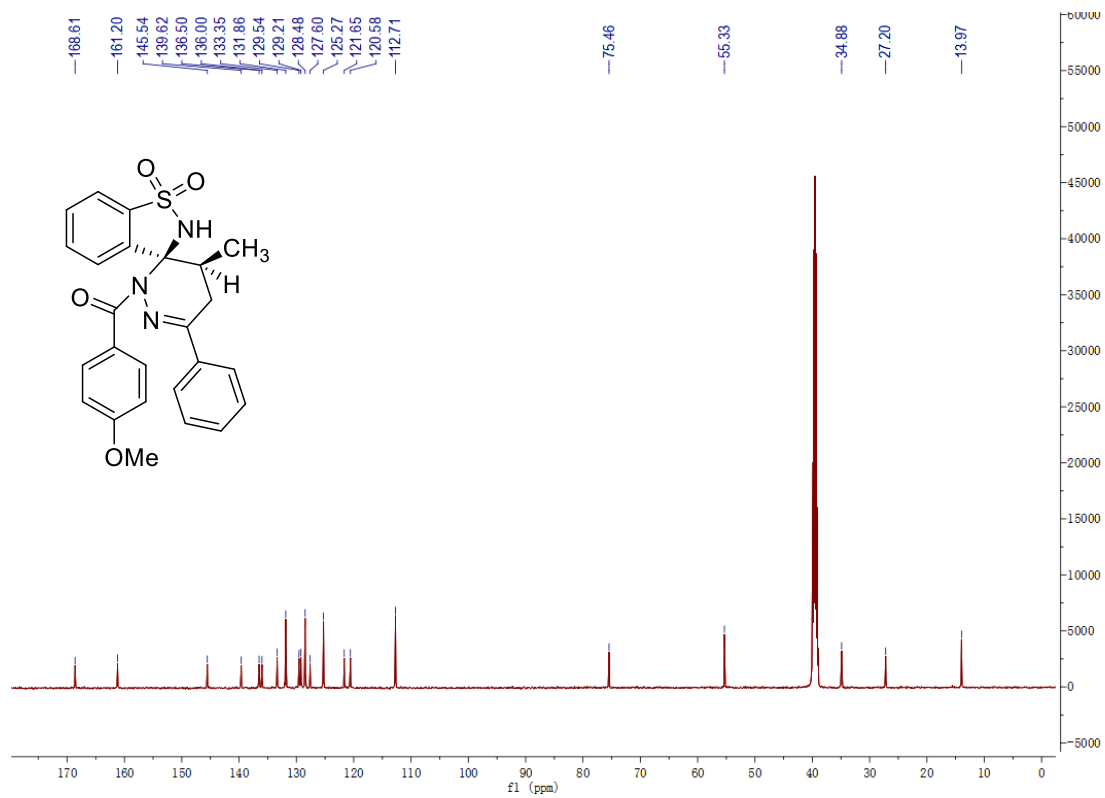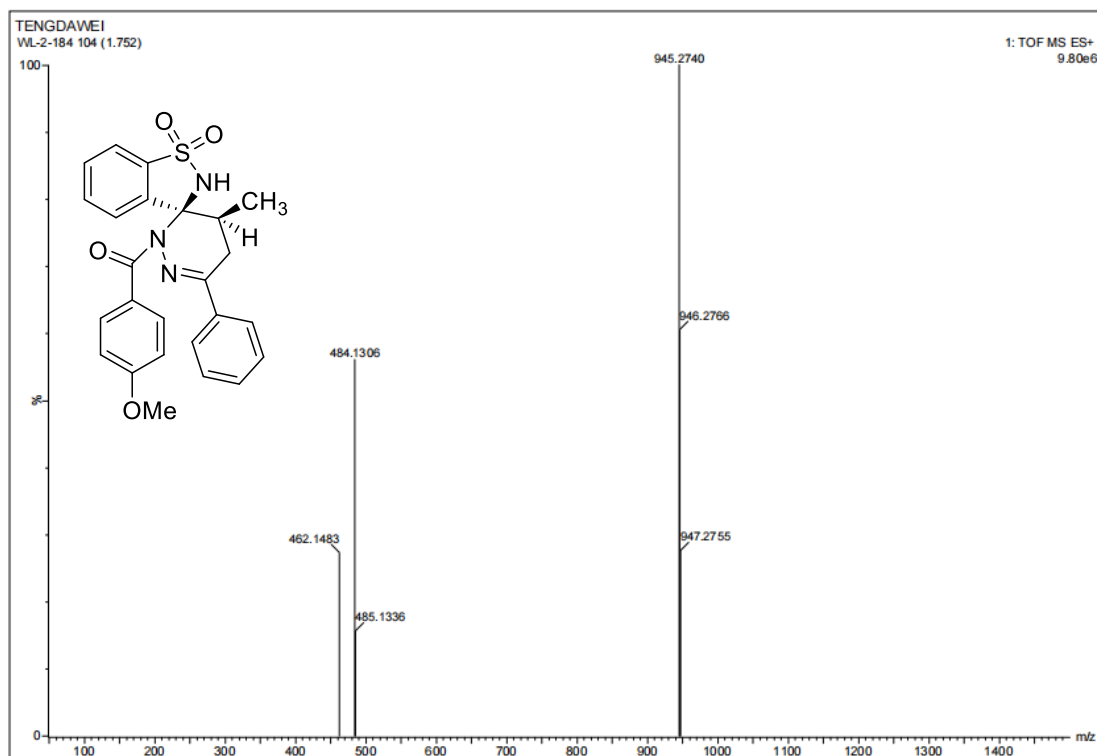

10) (4-Fluorophenyl)((3*R*\*,4'*S*'\*)-4'-methyl-1,1-dioxido-6'-phenyl-4',5'-dihydro-2*H*,2'*H*-spiro[benzo[*d*]isothiazole-3,3'-pyridazin]-2'-yl)methanone (**3aj**)

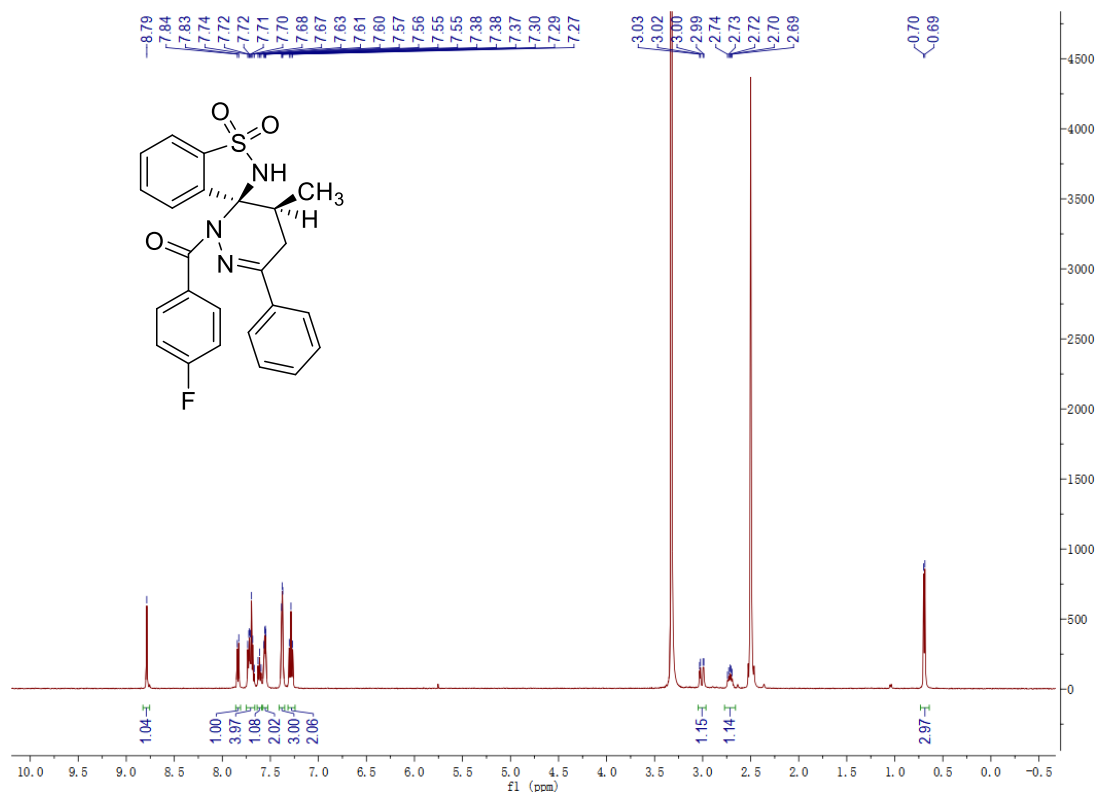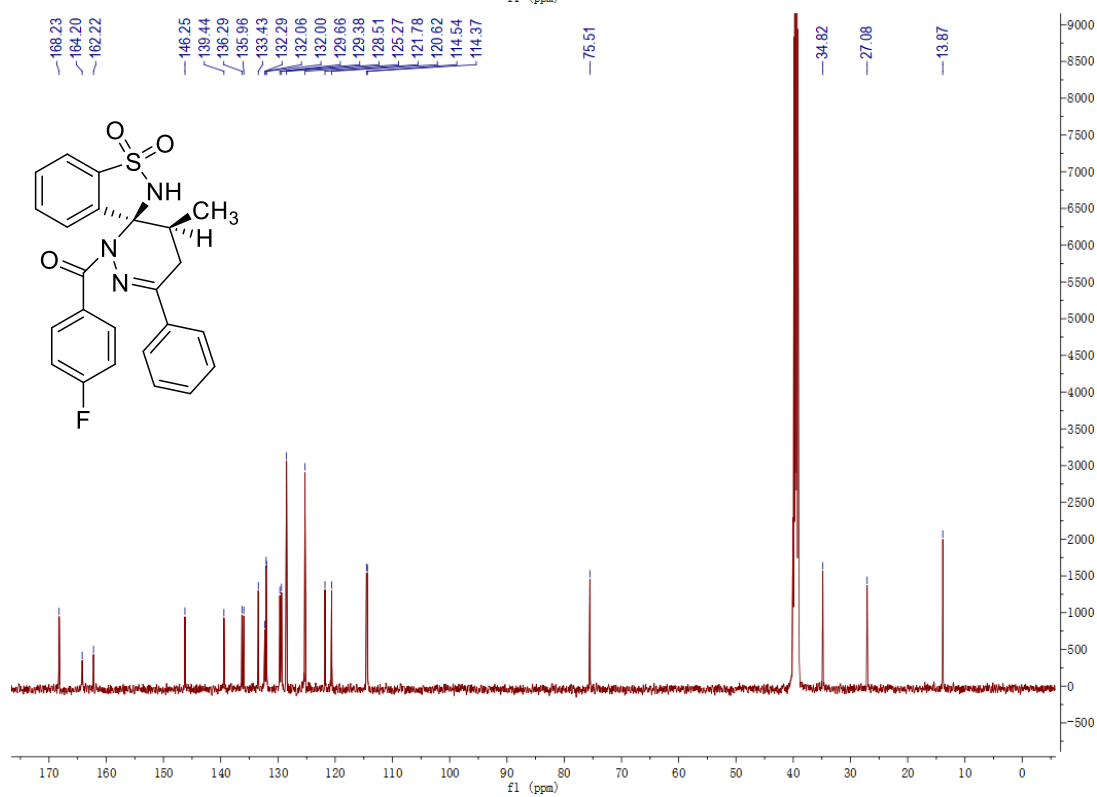

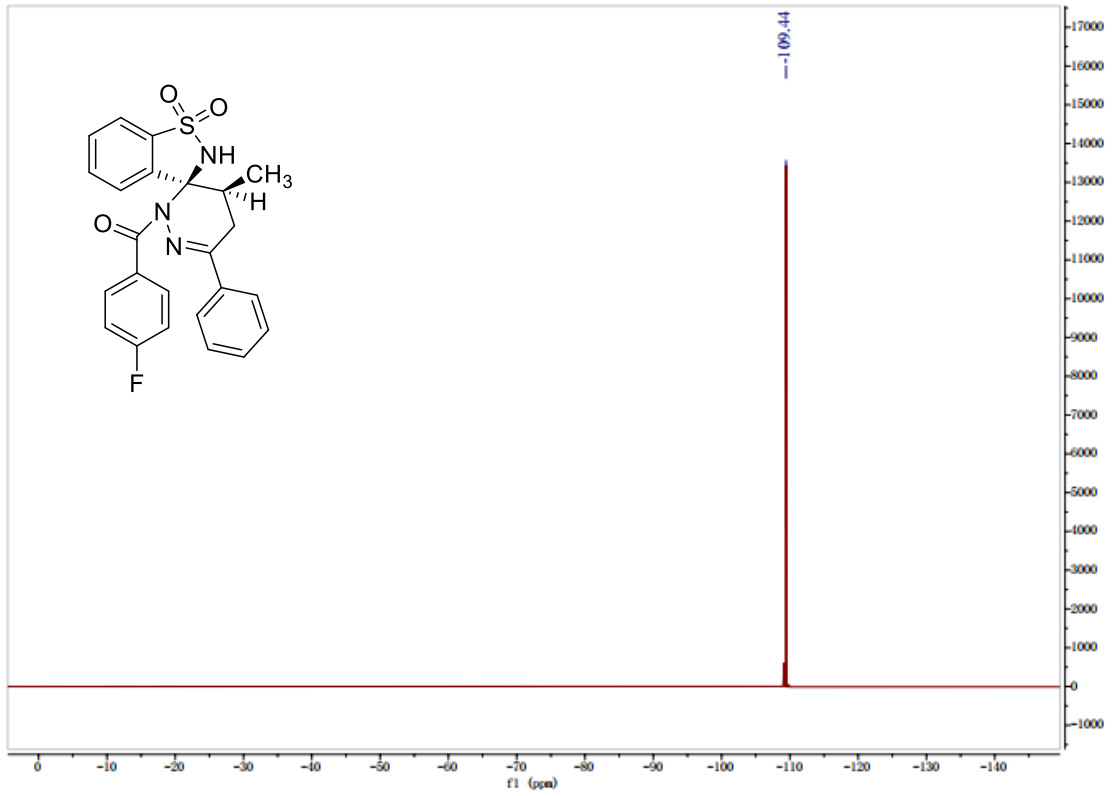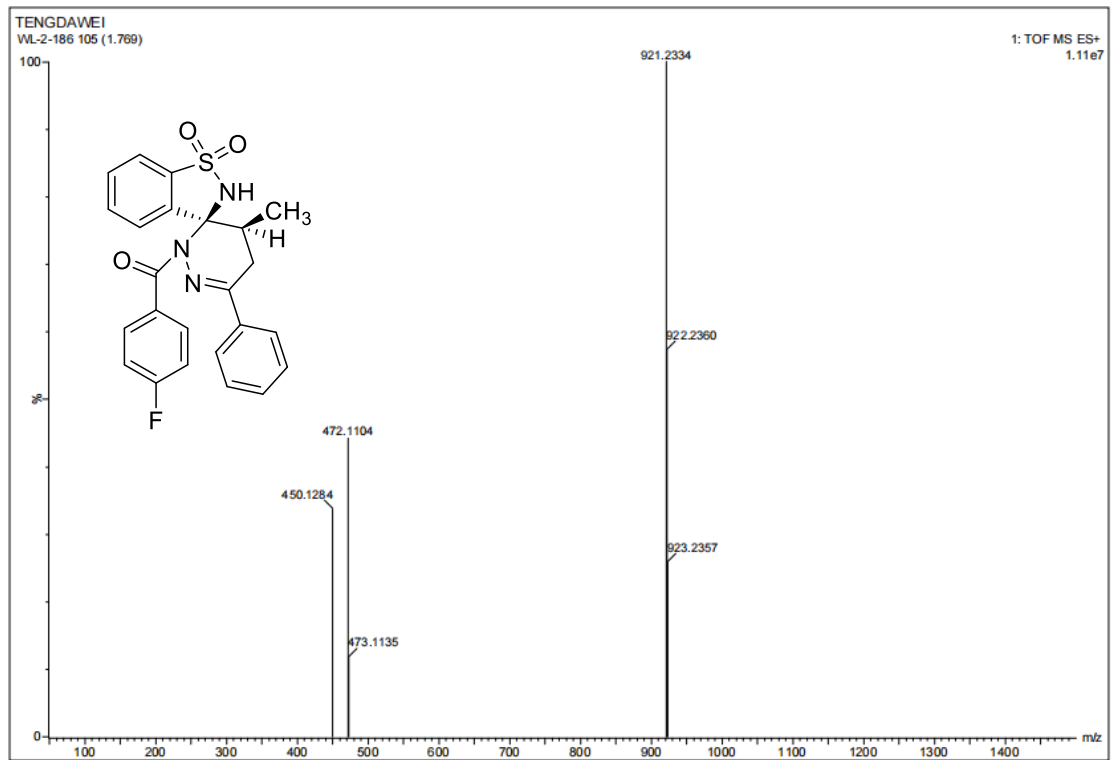



11) (4-Chlorophenyl)((3*R*\*,4'*S*'\*)-4'-methyl-1,1-dioxido-6'-phenyl-4',5'-dihydro-2*H*,2'*H*-spiro[benzo[*d*]isothiazole-3,3'-pyridazin]-2'-yl)methanone (**3ak**)

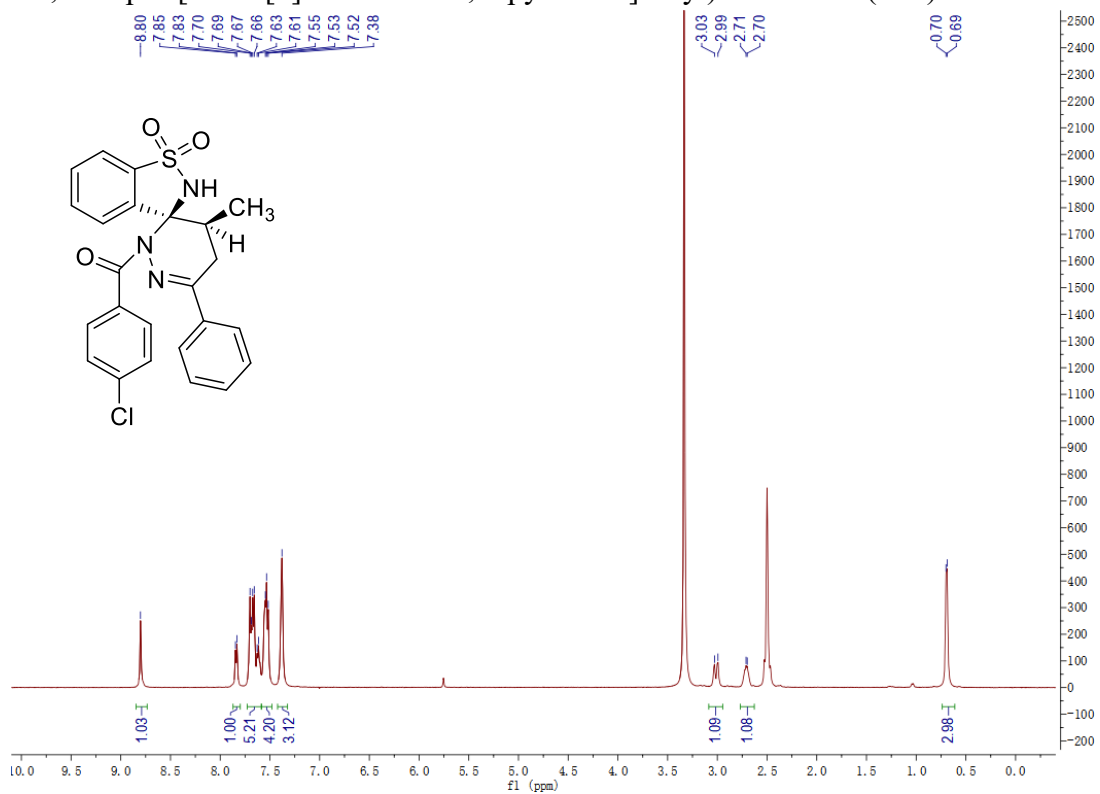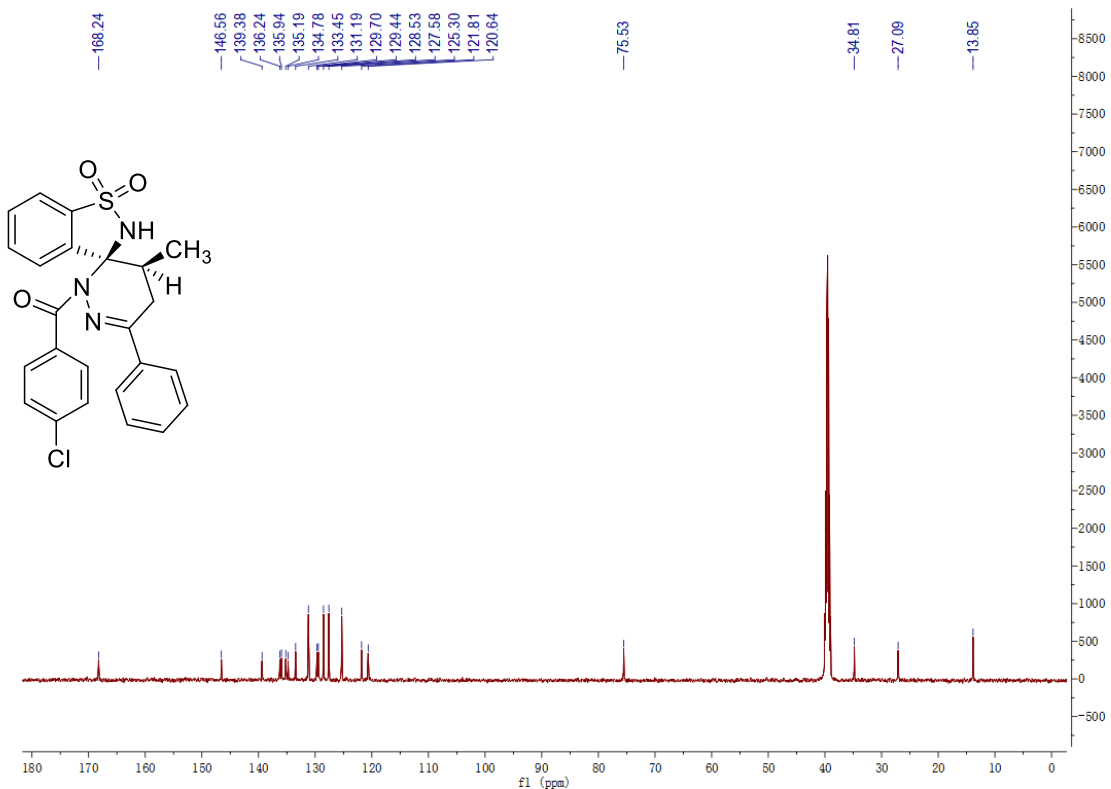

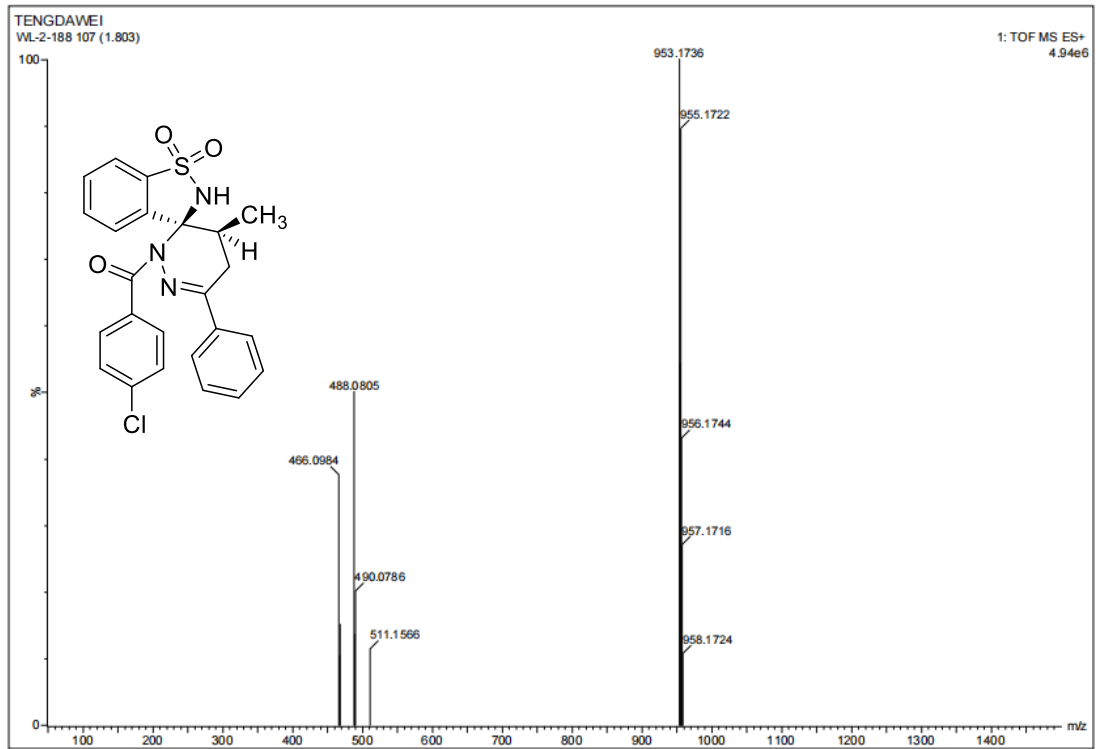

12) (4-Bromophenyl)((3*R*\*,4*S*\*)-4'-methyl-1,1-dioxido-6'-phenyl-4',5'-dihydro-2*H*,2'*H*-spiro[benzo[*d*]isothiazole-3,3'-pyridazin]-2'-yl)methanone (**3al**)

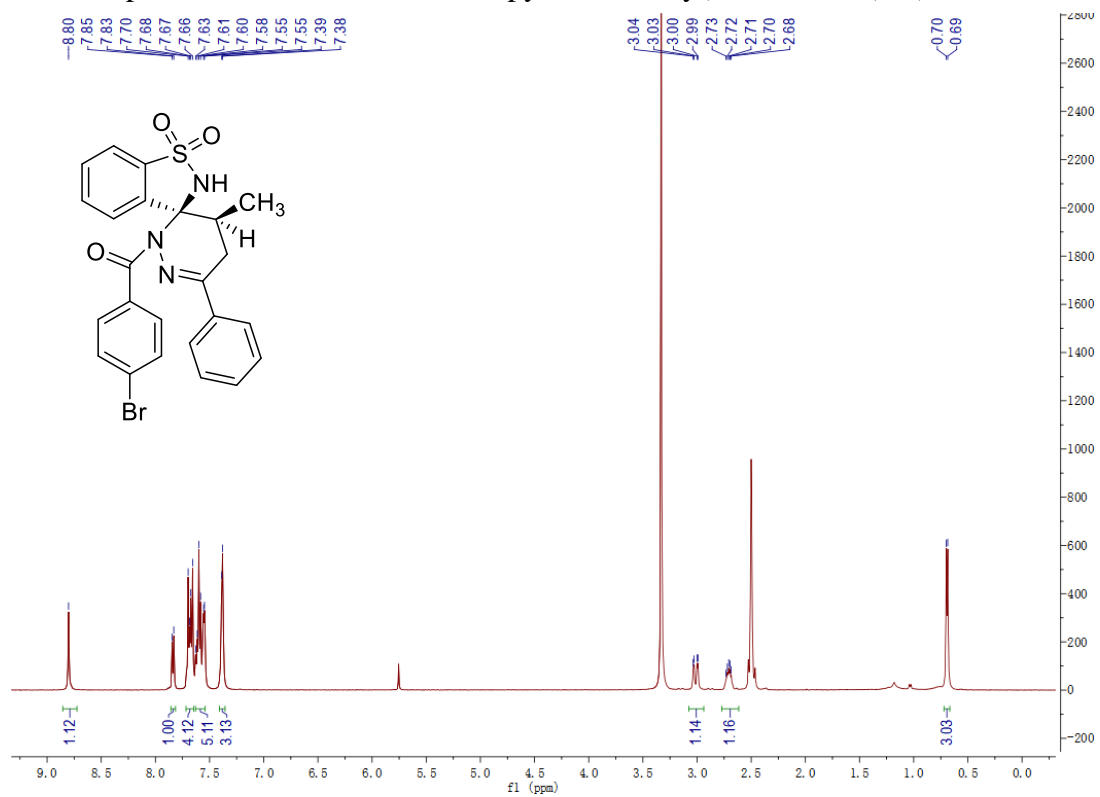

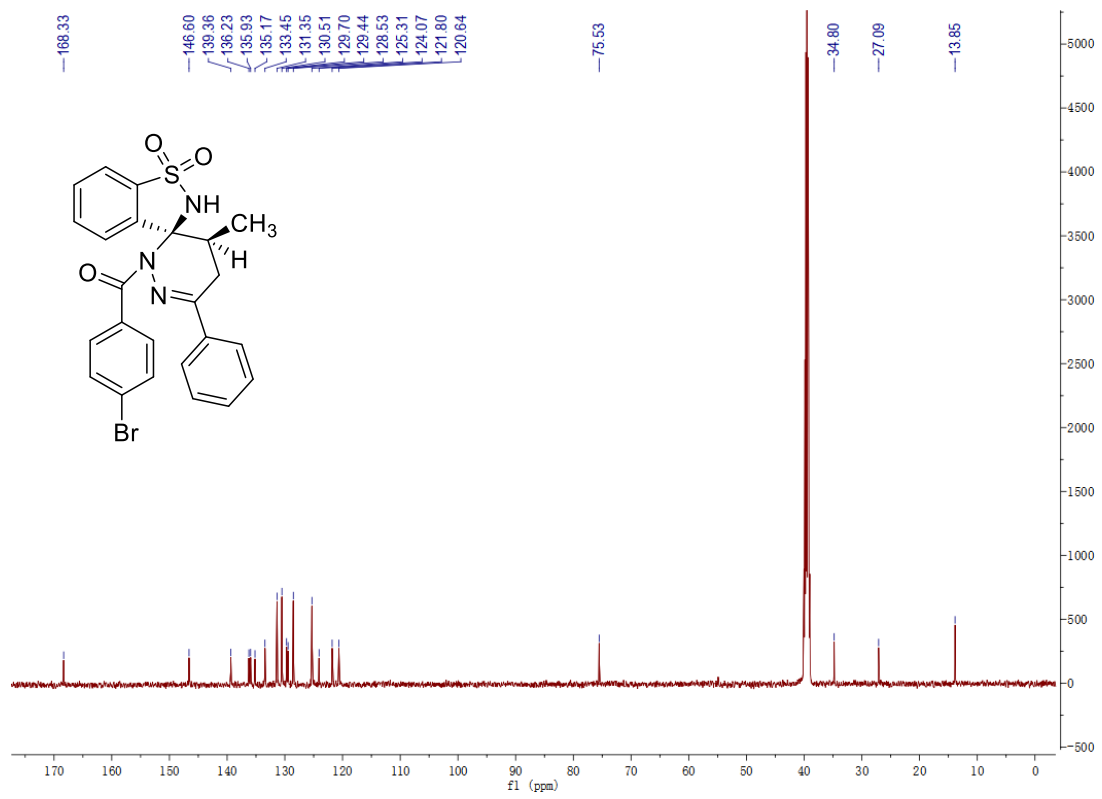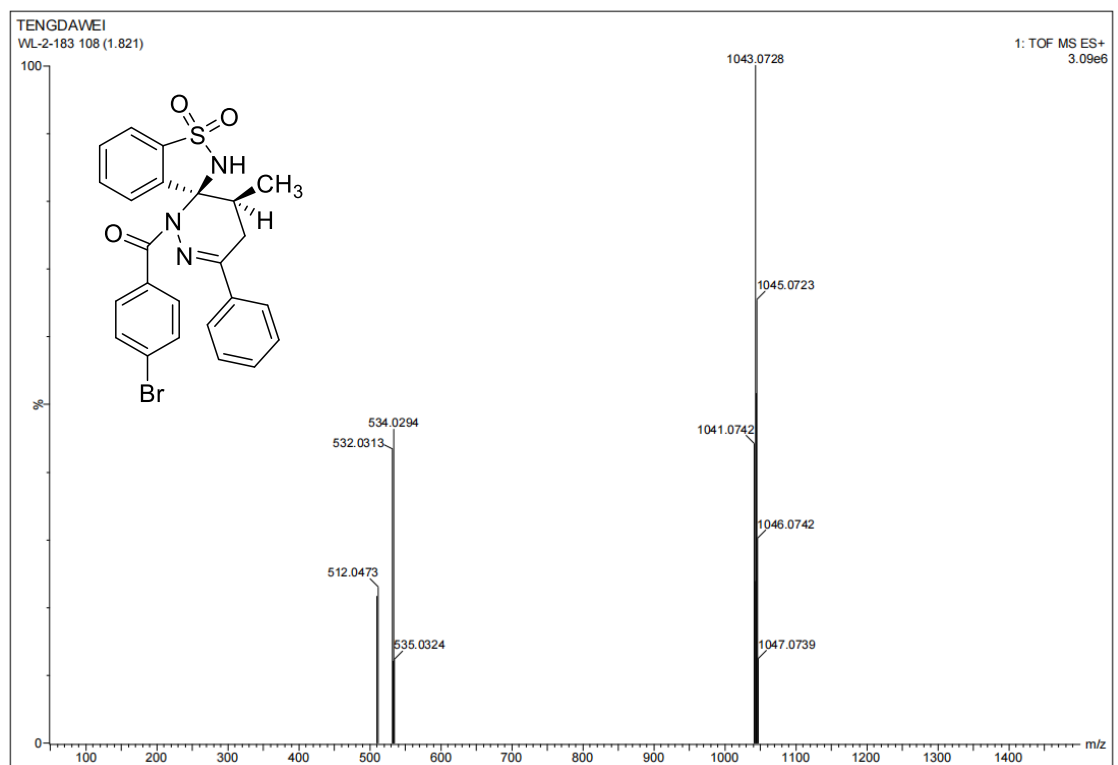

13) ((3*R*\*,4'*S*'\*)-6'-(3-Chloro-4-methoxyphenyl)-4'-methyl-1,1-dioxido-4',5'-dihydro-2*H*,2'*H*-spiro[benzo[*d*]isothiazole-3,3'-pyridazin]-2'-yl)(phenyl)methanone (**3am**)

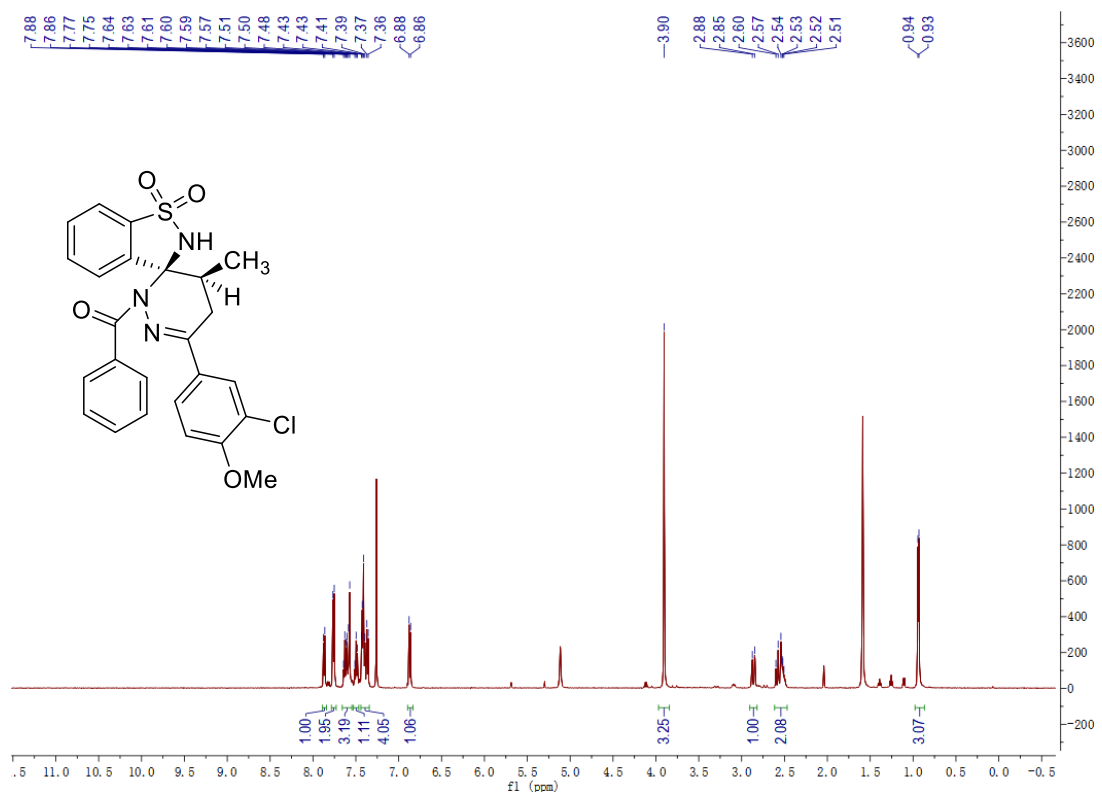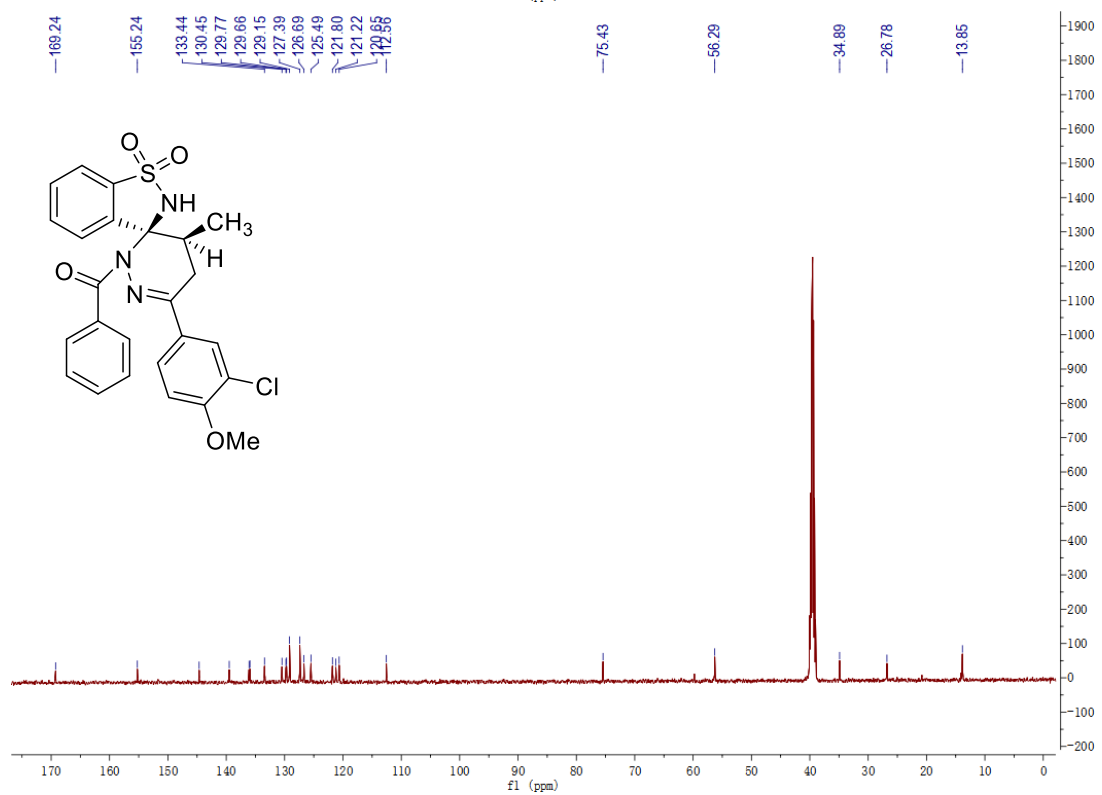

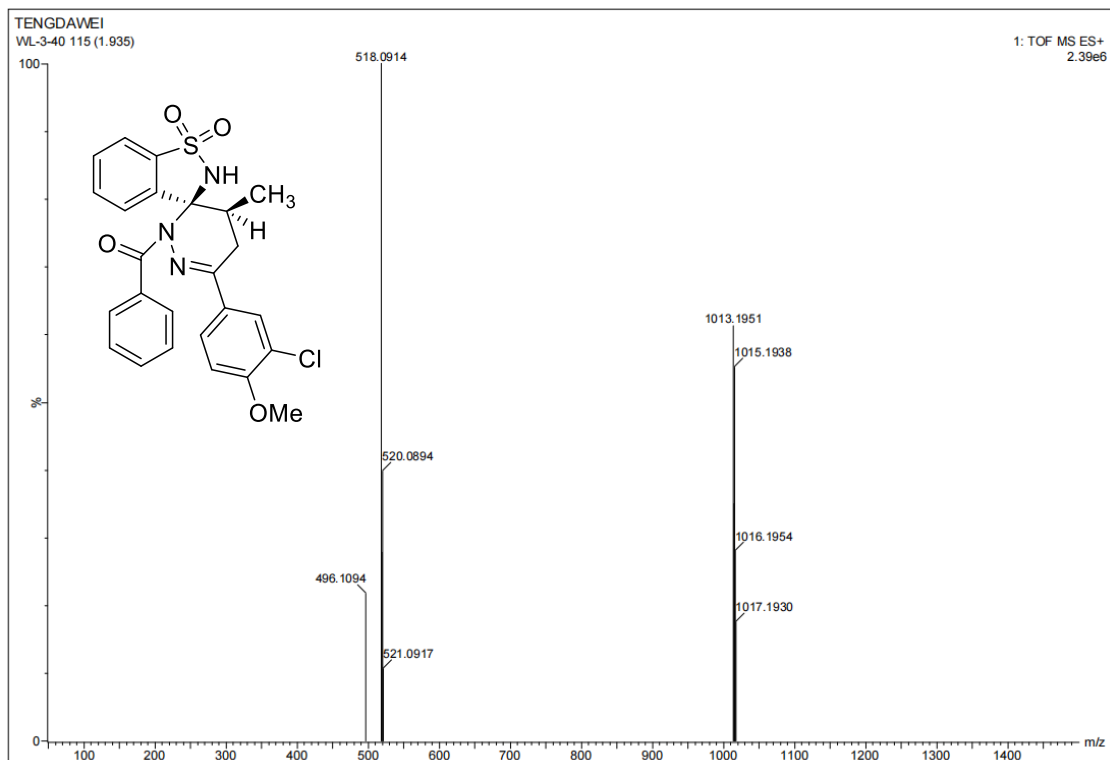

14) (*R*\*)-(4',4'-Dimethyl-1,1-dioxido-6'-phenyl-4',5'-dihydro-2*H*,2'*H*-spiro[benzo[*d*]isothiazole-3,3'-pyridazin]-2'-yl)(phenyl)methanone (**3ba**)

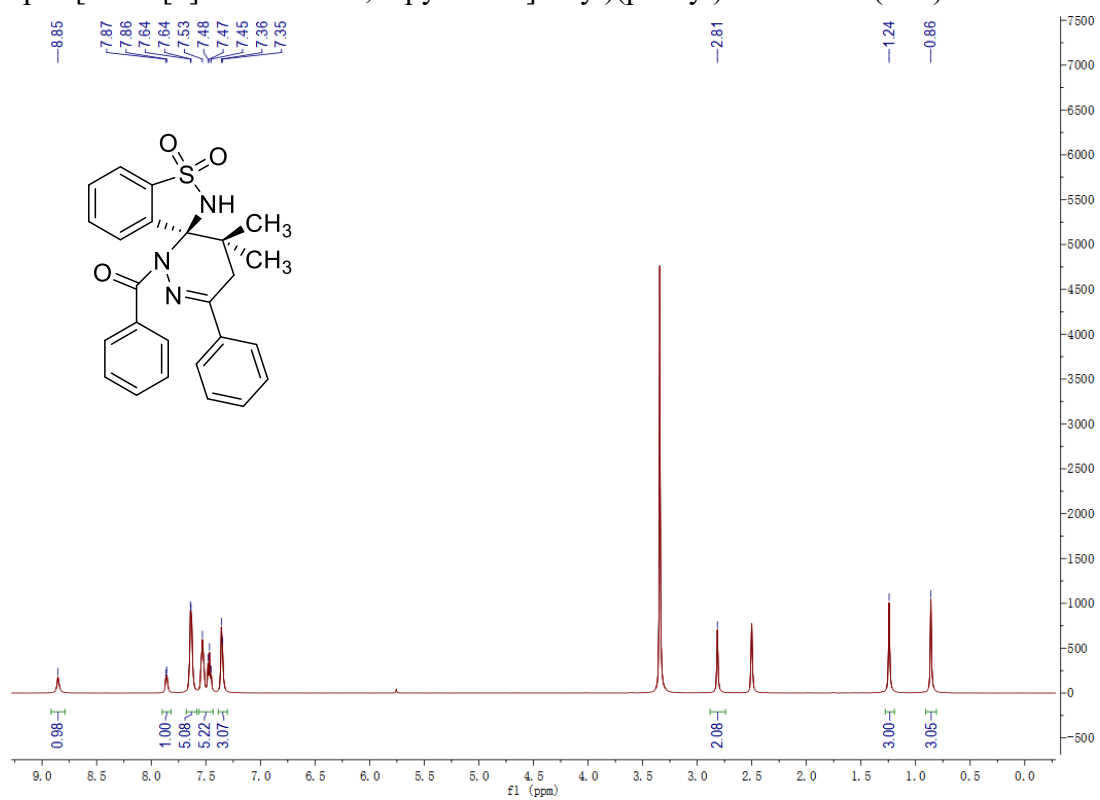

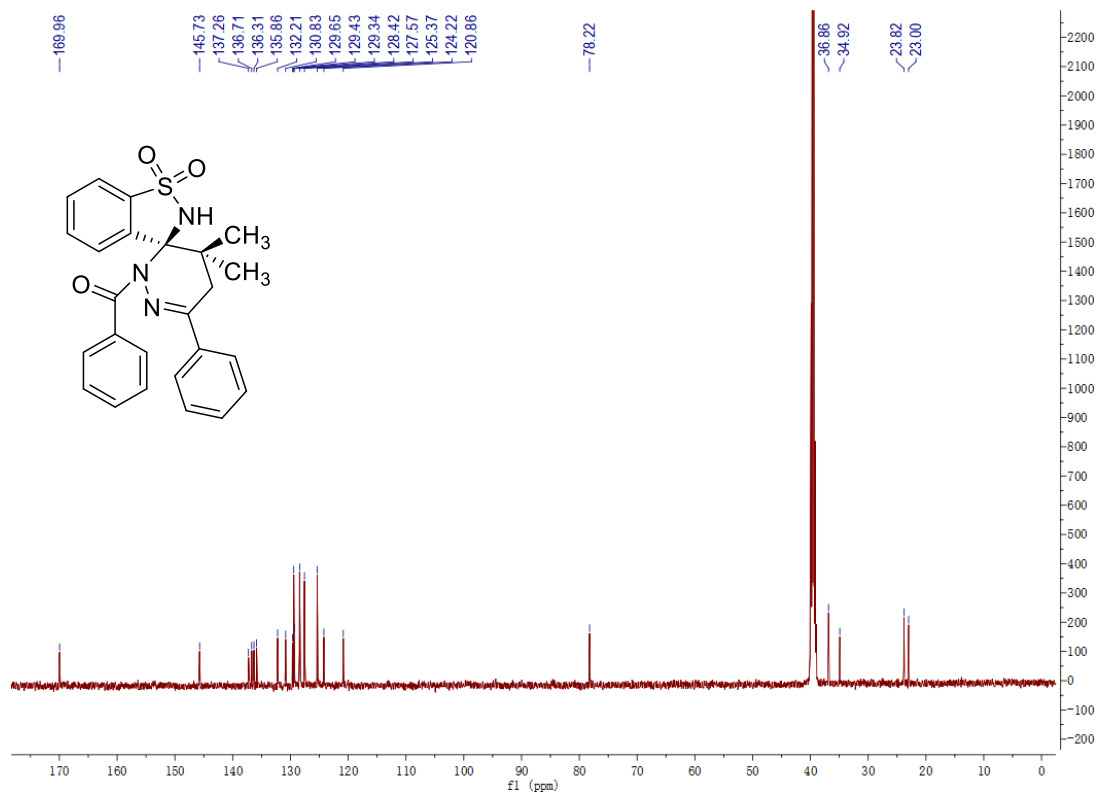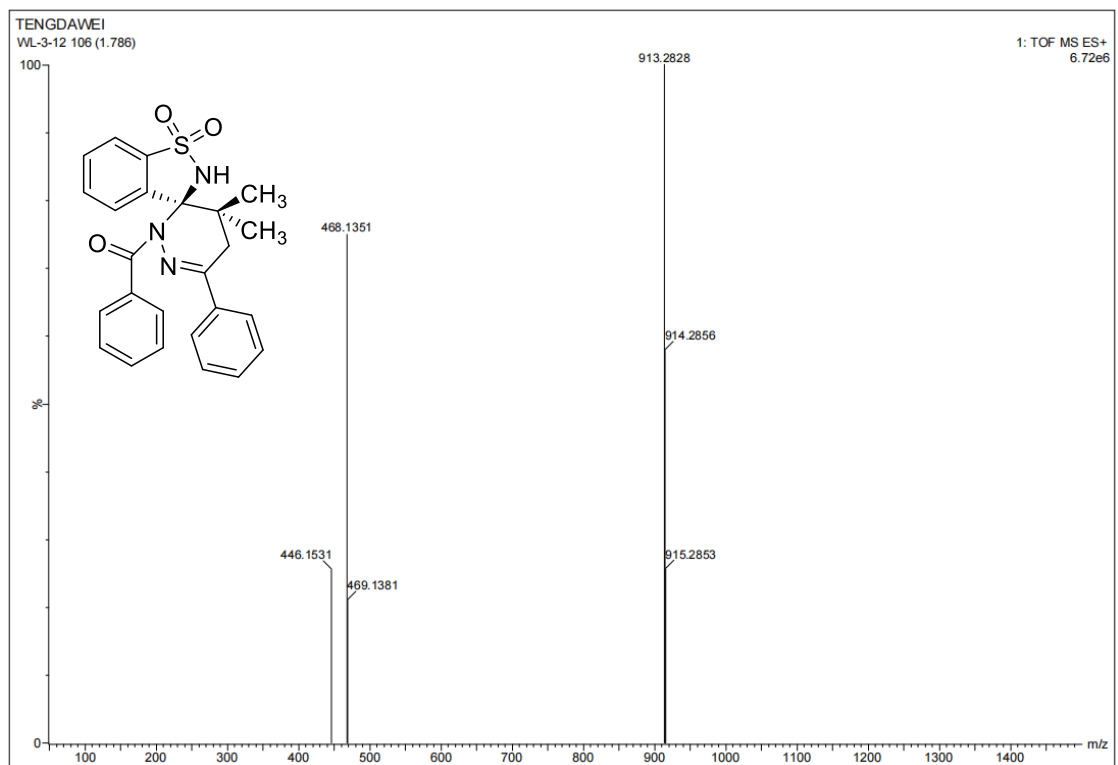

15) ((3*R*\*,4*S*'\*)-1,1-Dioxido-6'-phenyl-4'-propyl-4',5'-dihydro-2*H*,2'*H*-spiro[benzo[*d*]isothiazole-3,3'-pyridazin]-2'-yl)(phenyl)methanone (**3ca**)

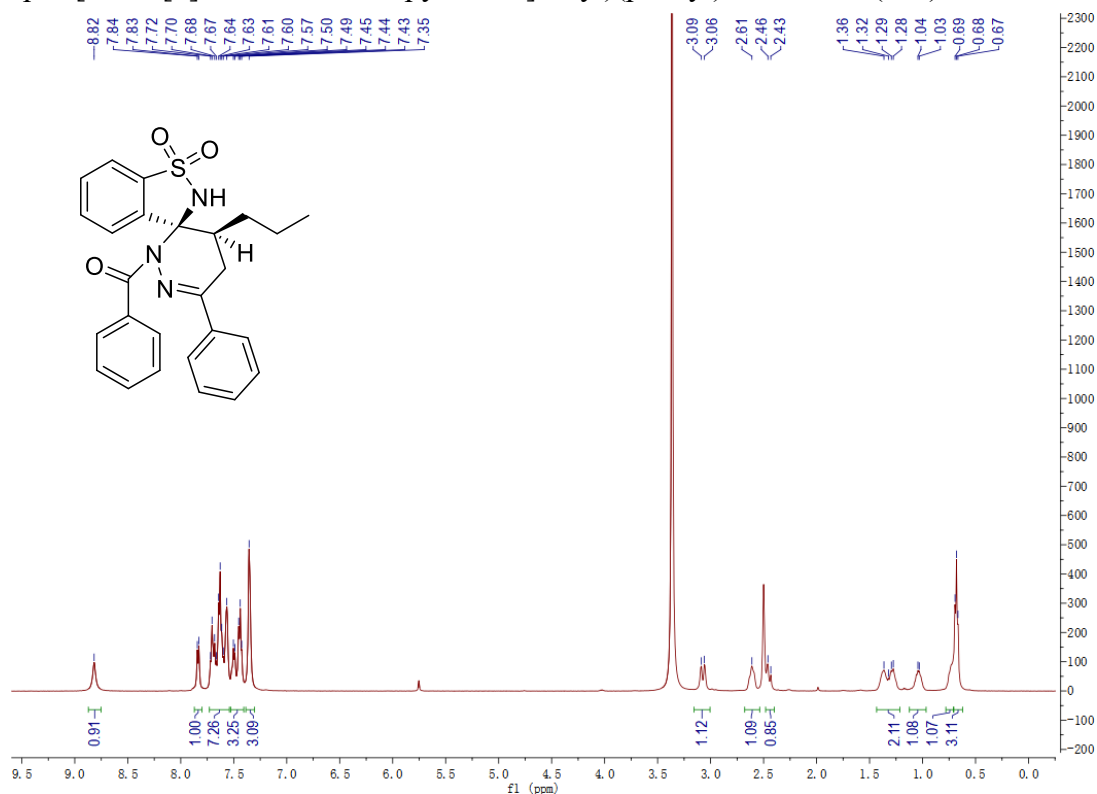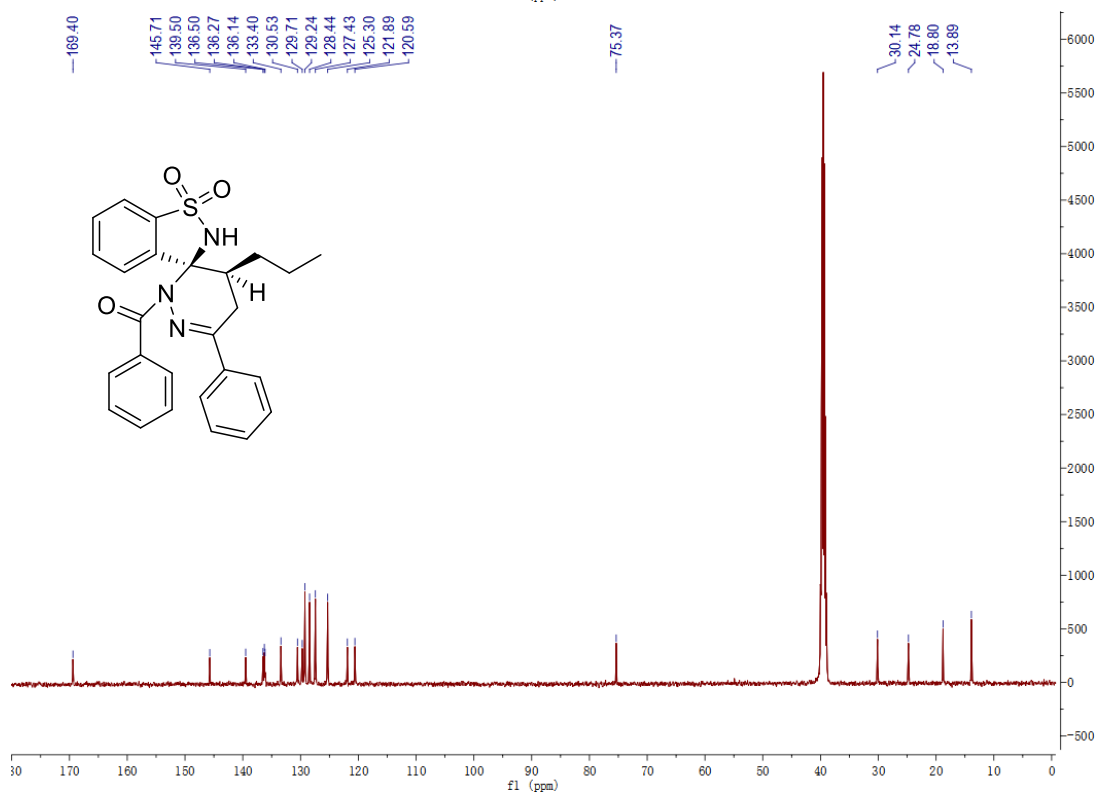

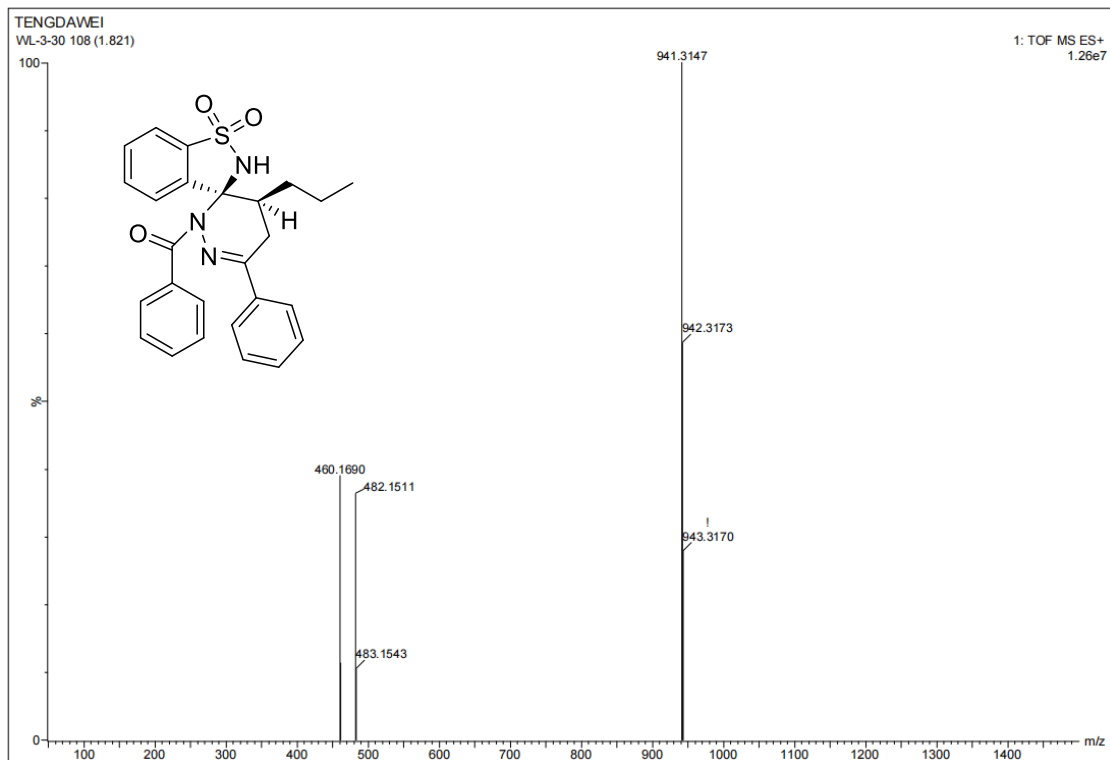

16) (*R*<sup>\*</sup>)-3-Methyl-3-(2-oxo-2-phenylethyl)-2,3-dihydro-4*H*-benzo[*e*][1,2]thiazin-4-one 1,1-dioxide (**4aa**)

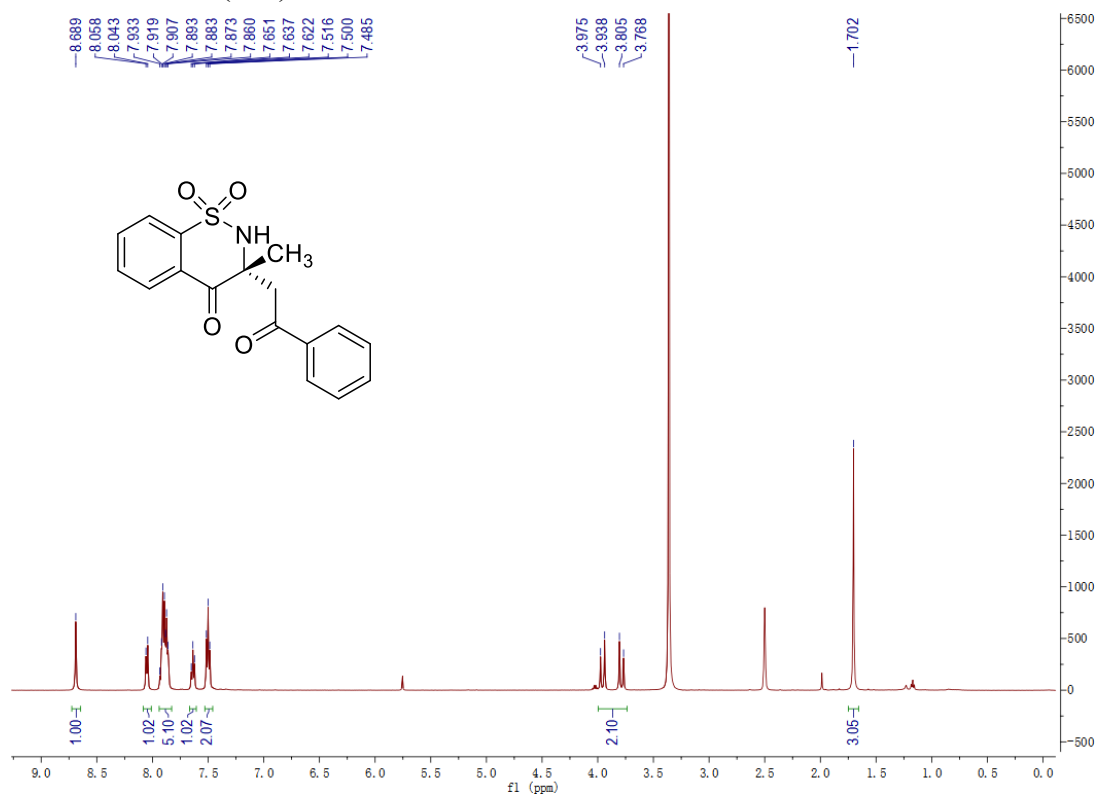



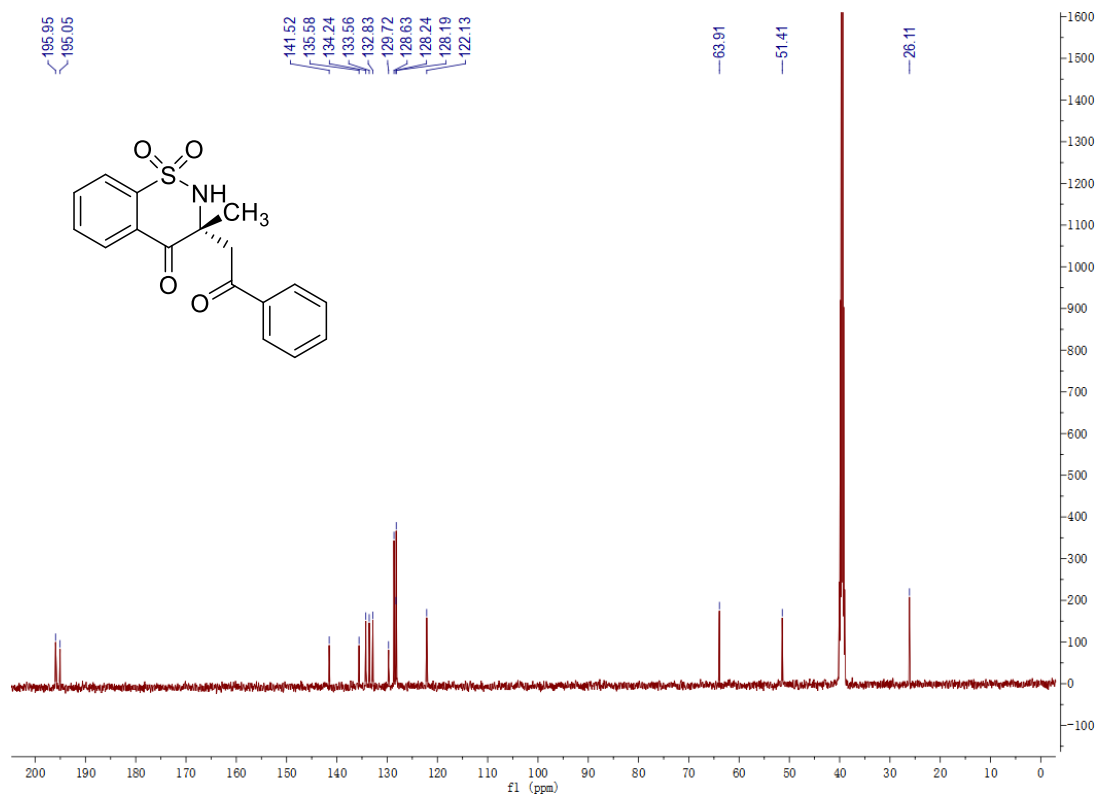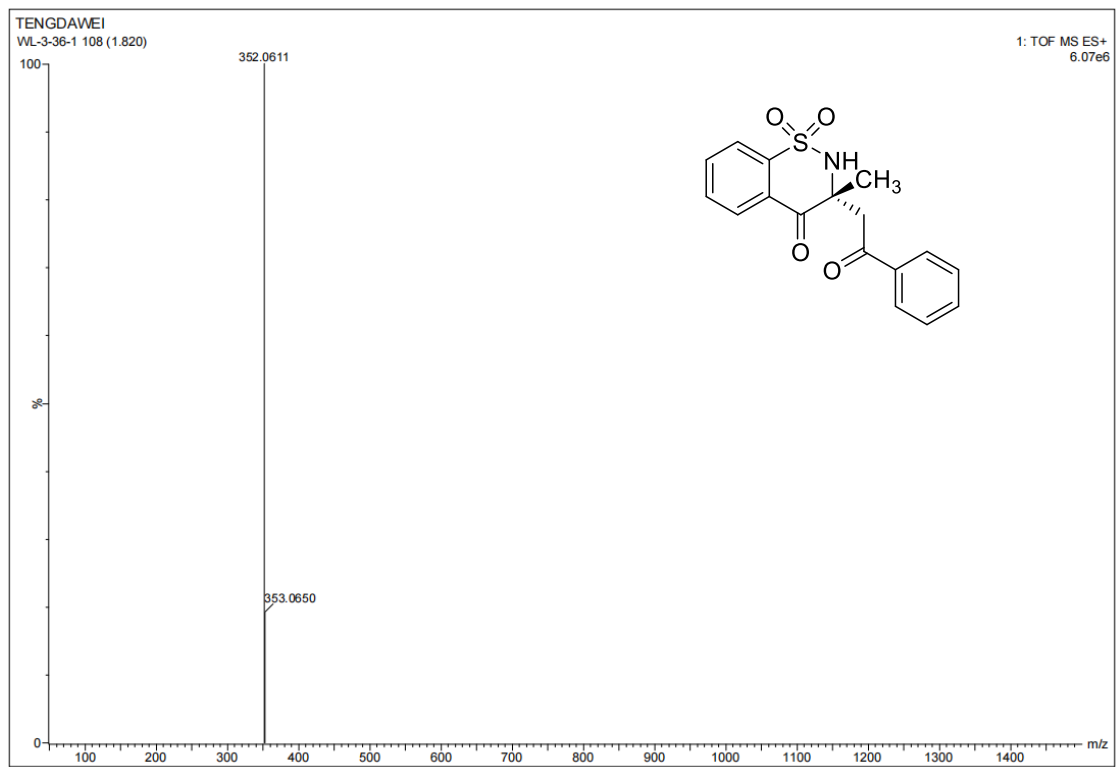

# <sup>1</sup>H NMR chromatograms of compound 3 and its diastereoisomer

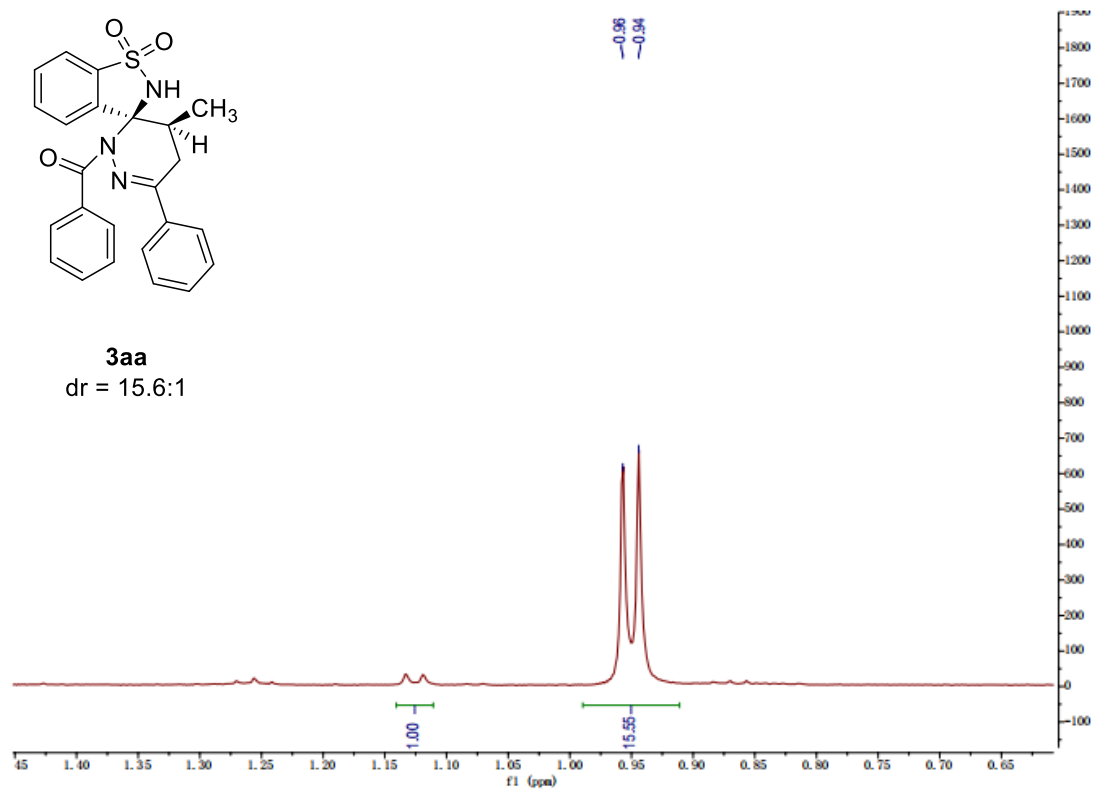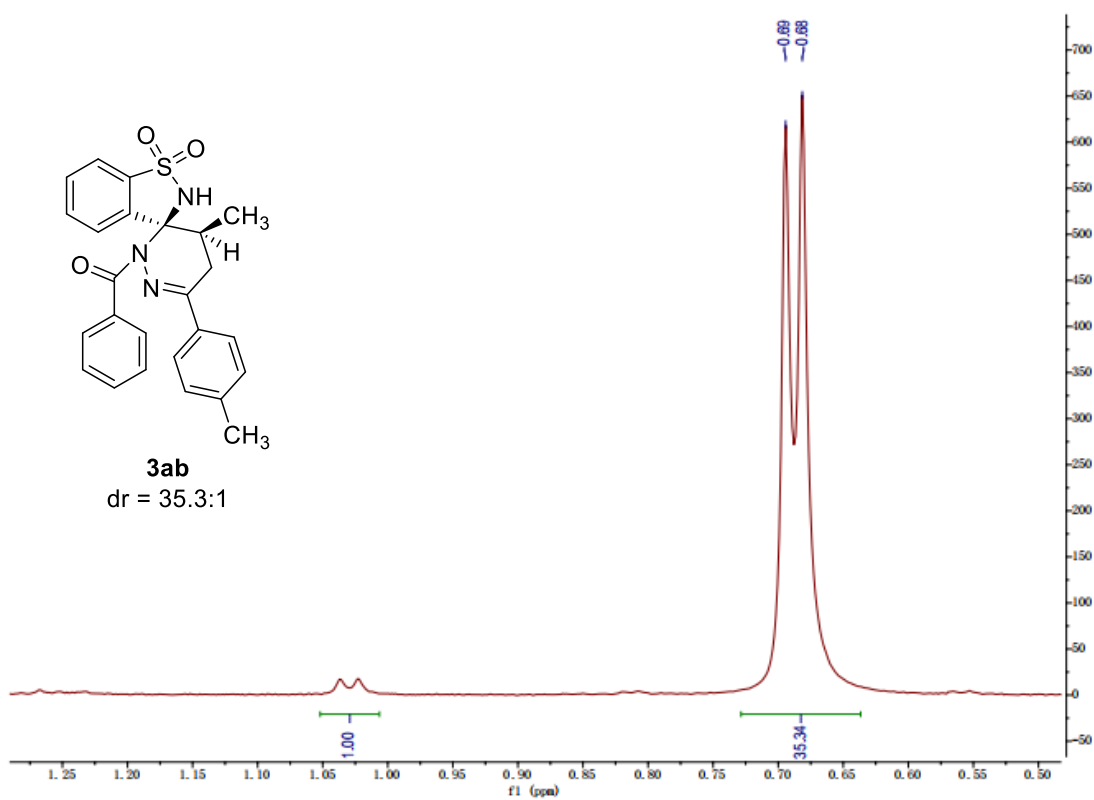

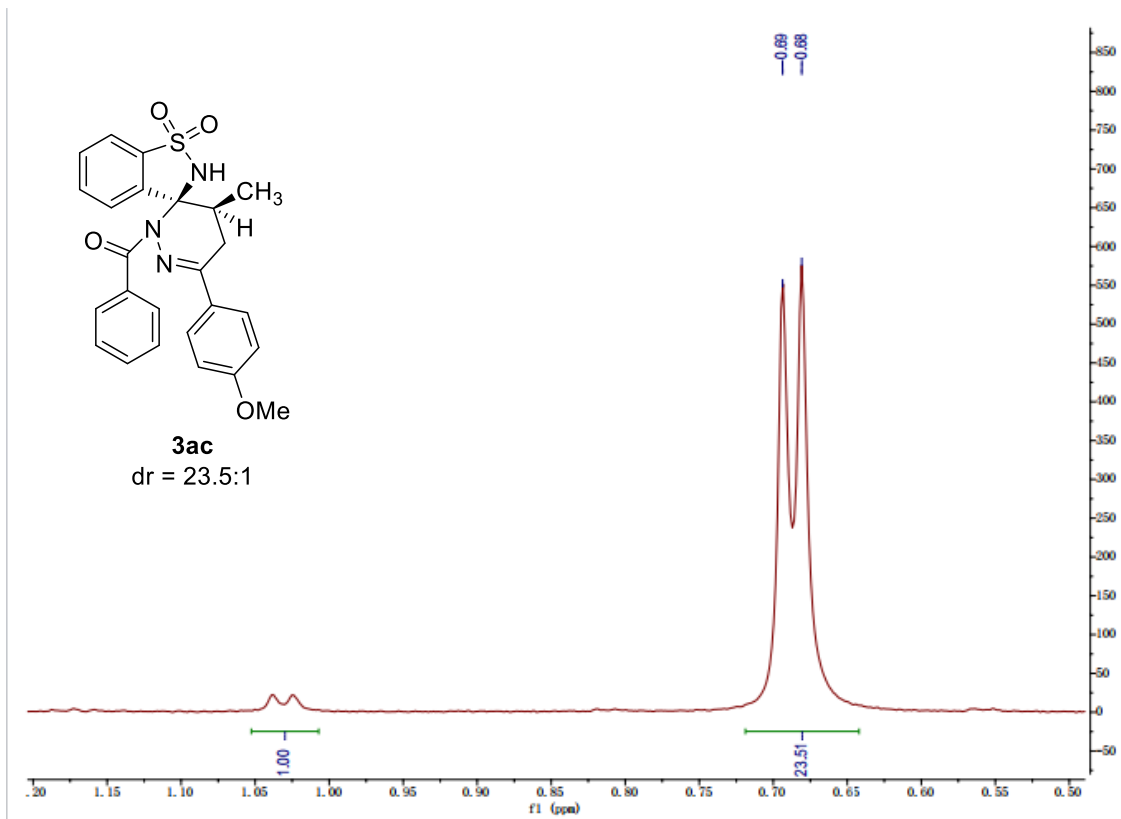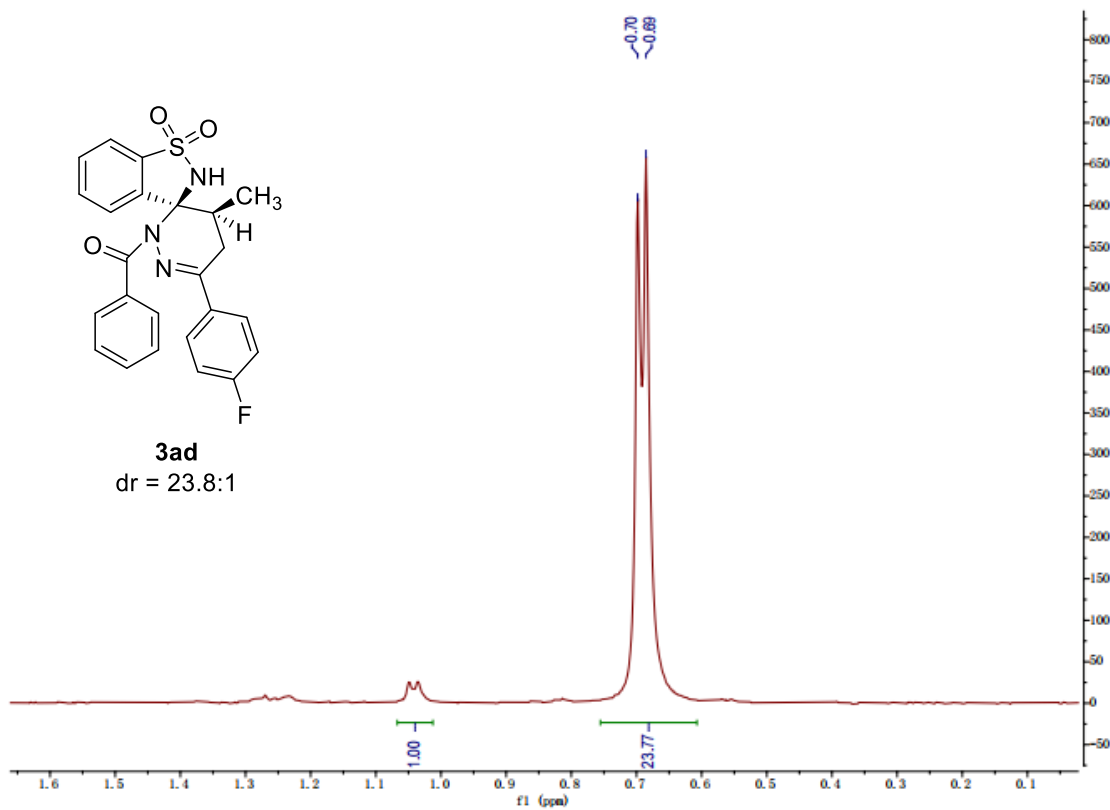

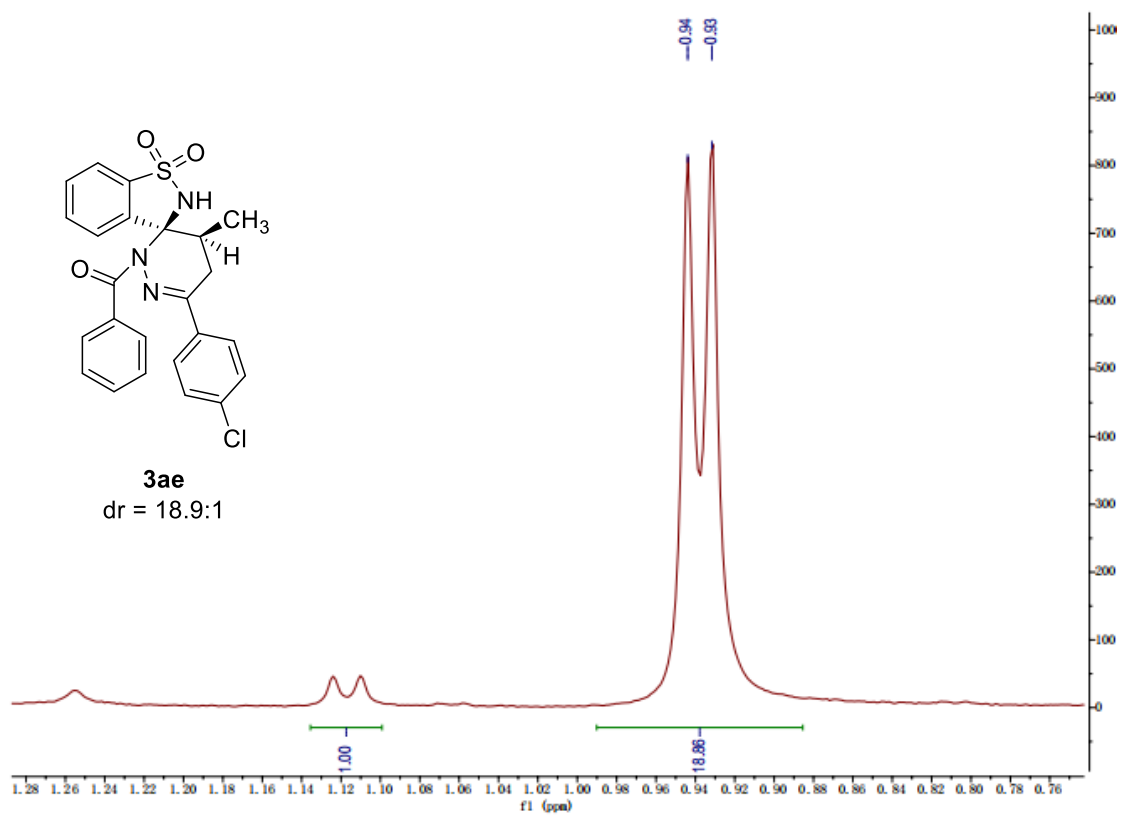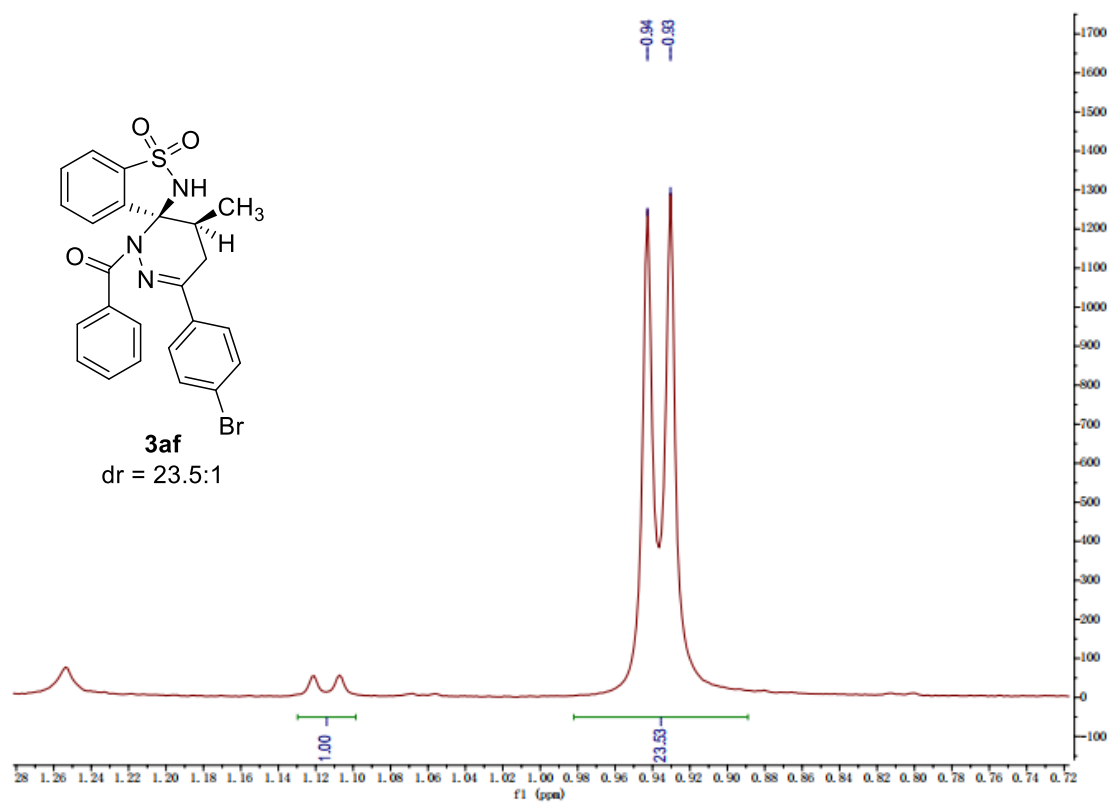

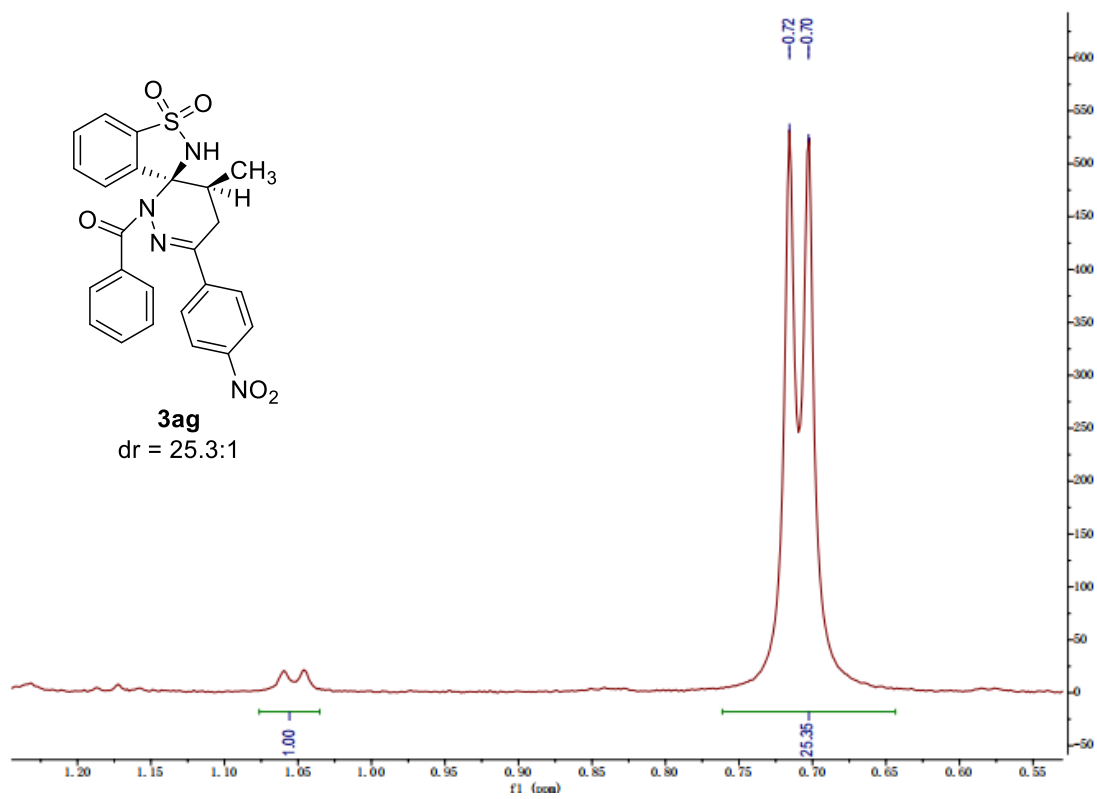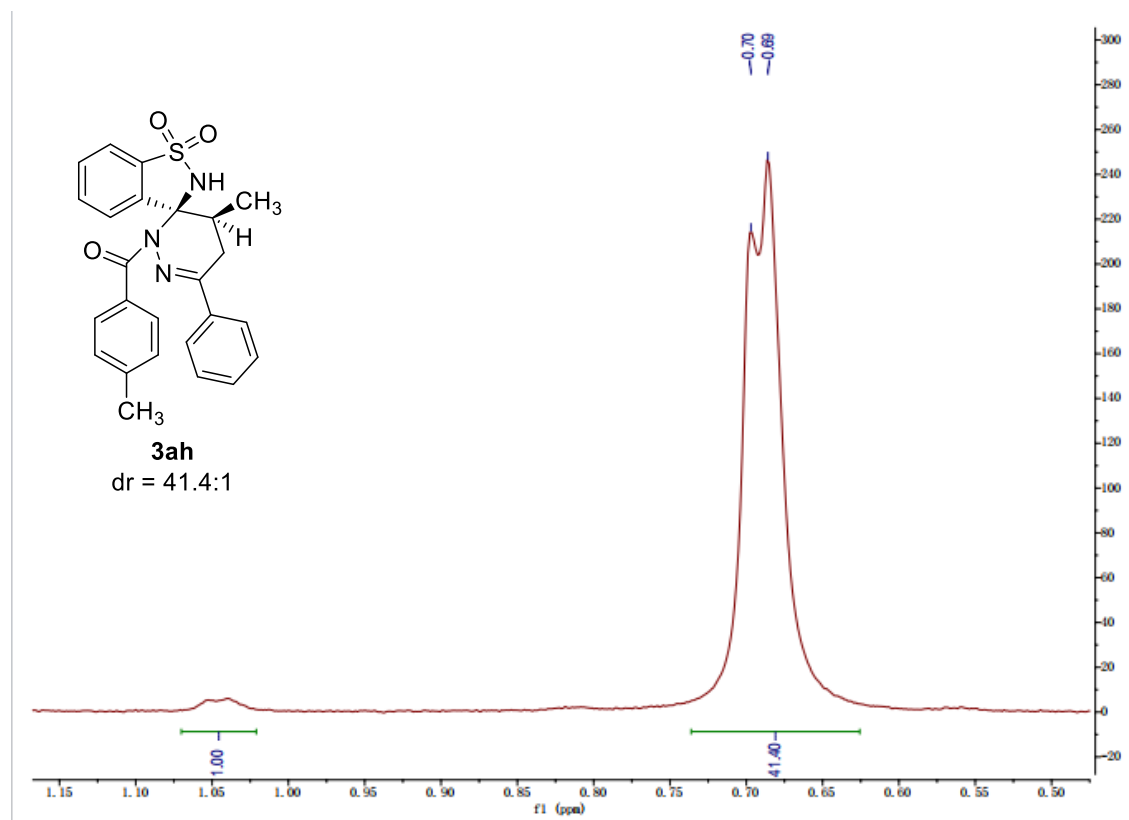

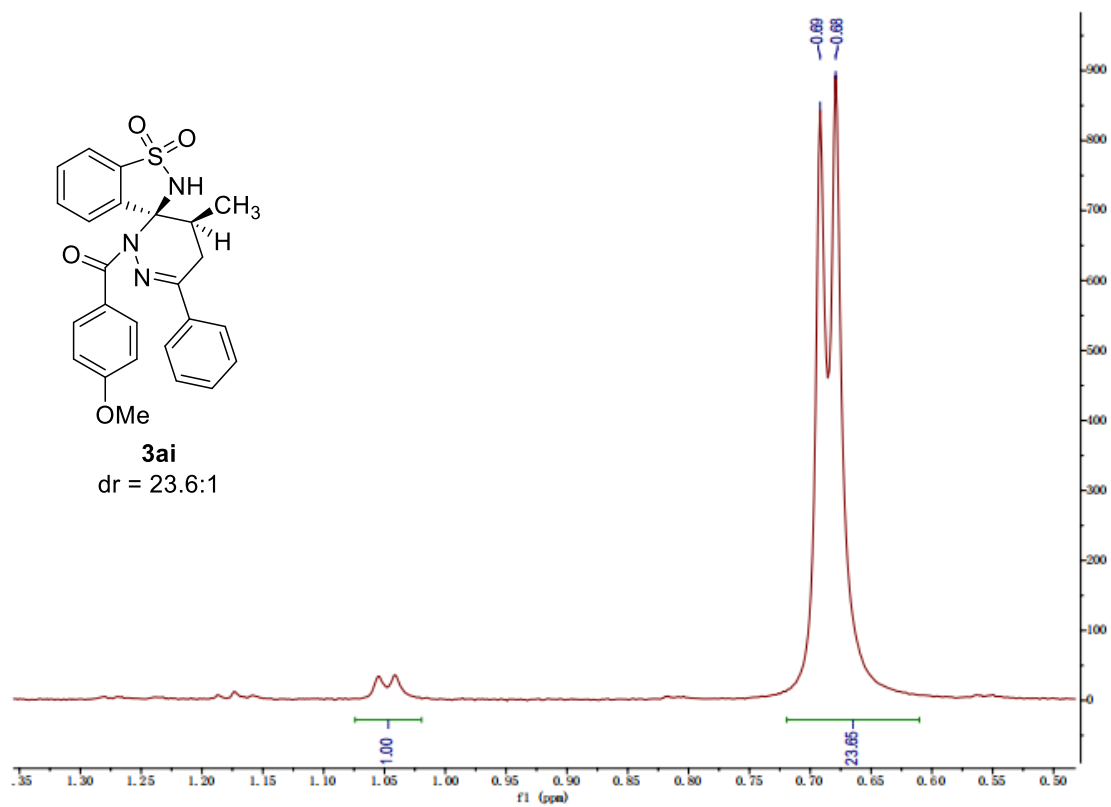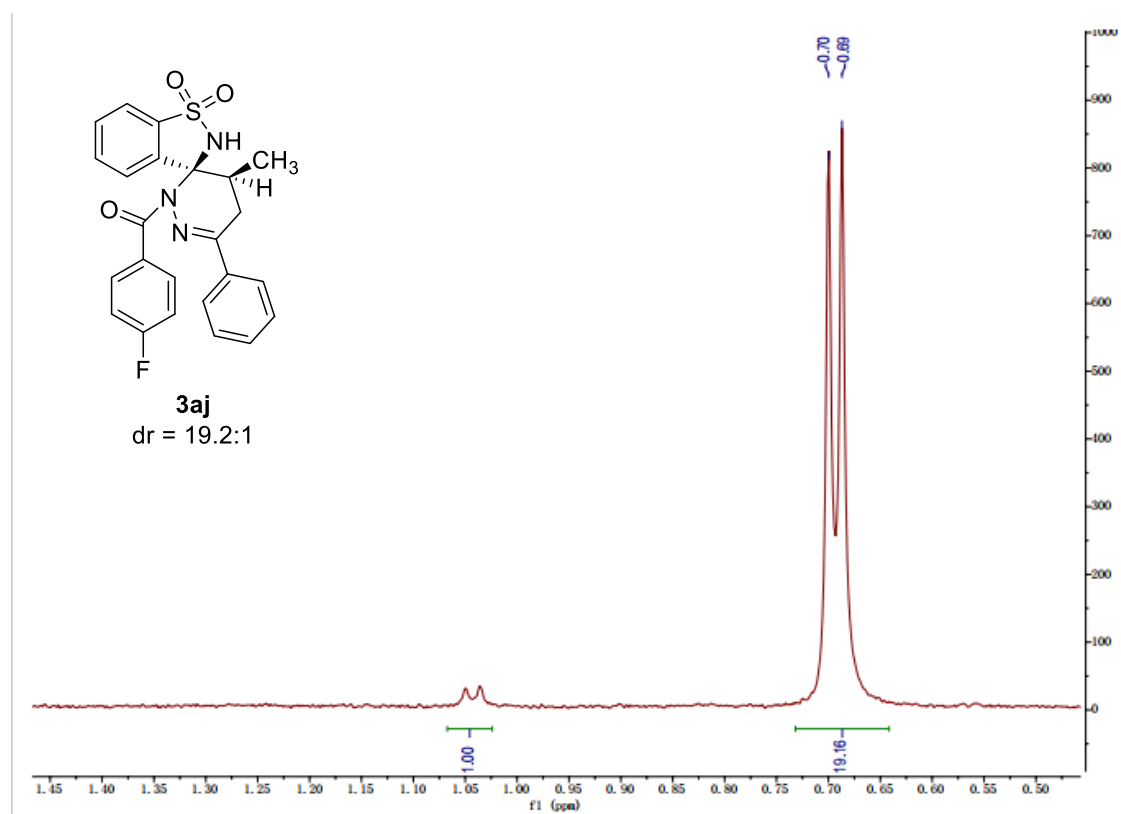

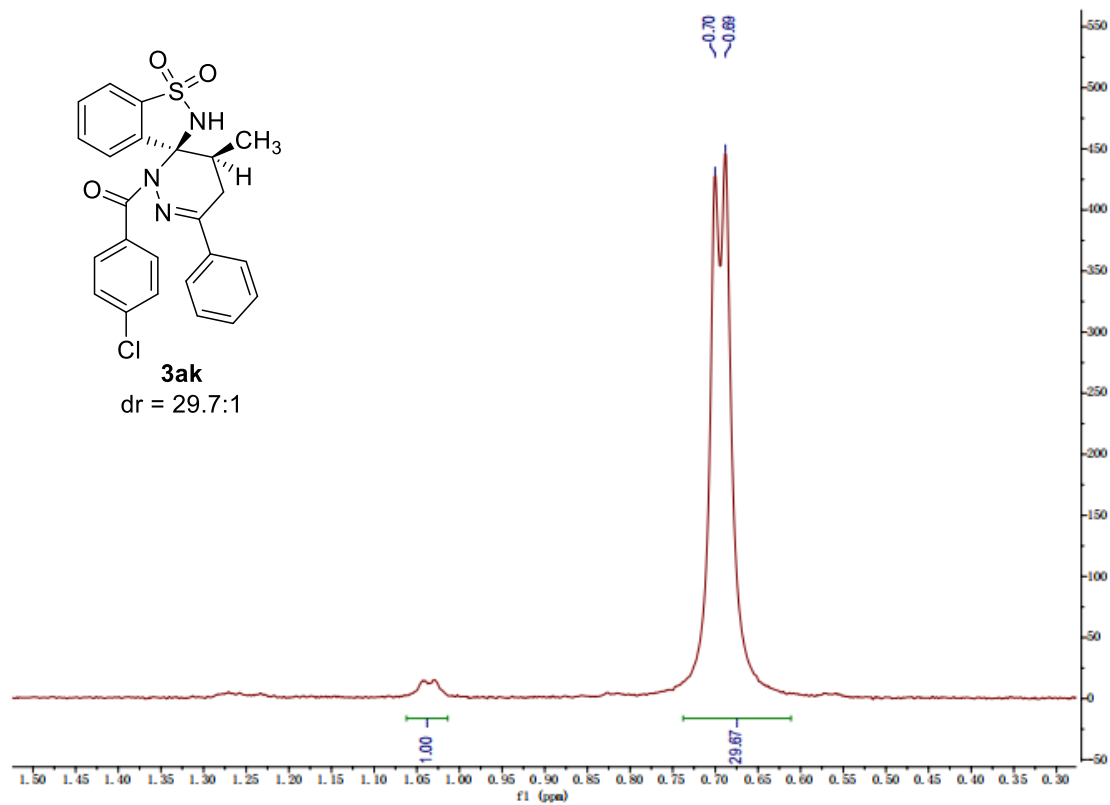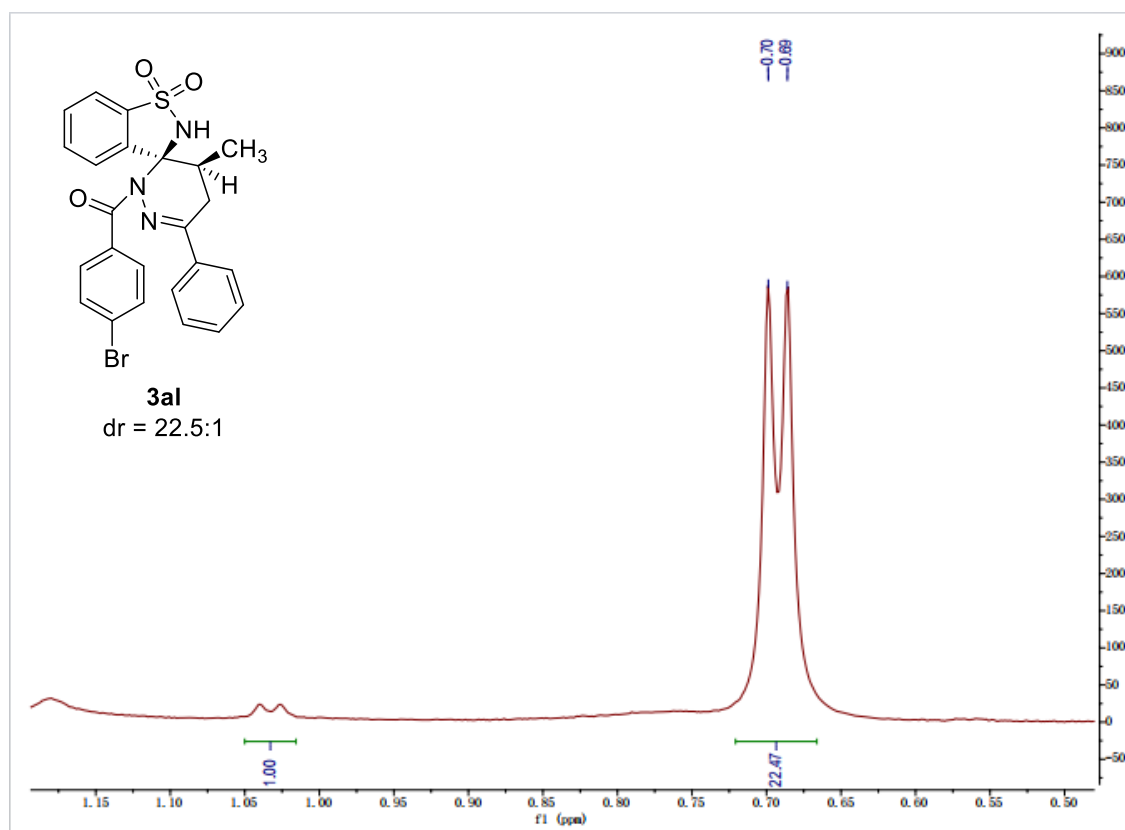

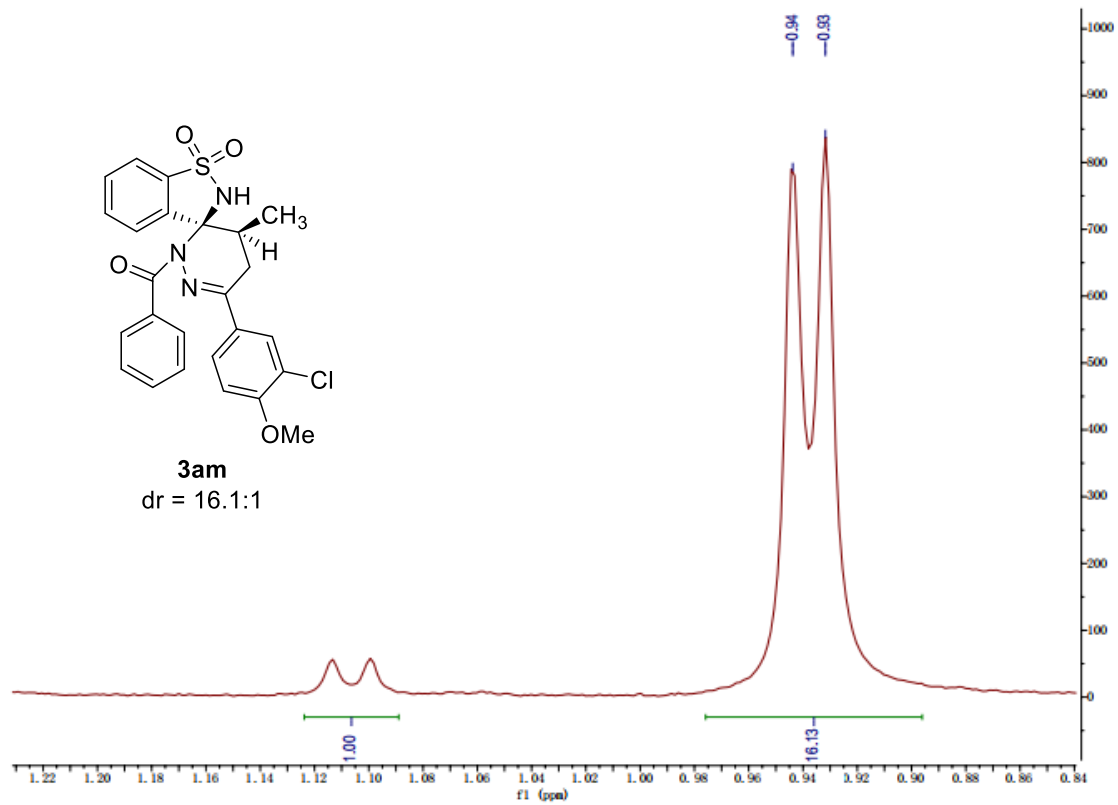

Supplement: Additional file 1 [file 1860-5397-20-29-S1.pdf]
